# Supplementary material
Source: publisher figshare collection journal article supplement (https://tandf.figshare.com/articles/dataset/_/19605934)
Supplement: Supplementary file 1 [file 1]

## Sheet: TableS1
Table S1. List of species names, location of source RNA-seq data* and BUSCO scores for the assembled transcriptomes.
Clade	Species name	Source data	BUSCO score
Rhizaria	Ammonia sp.	SRR1300434	71
Rhizaria	Globobulimina sp.	SRR6202056	76.9
Rhizaria	Eucyrtidium acuminatum	ERR2034991	60.8
Rhizaria	Bigelowiella natans	SRR1296871	66.3
Rhizaria	Paulinella chromatophora	http://cyanophora.rutgers.edu/paulinella/	79.3
Alveolata	Toxoplasma gondii	http://toxodb.org/toxo/	99.3
Alveolata	Plasmodium falciparum	http://plasmodb.org/plasmo/	68.4
Alveolata	Vitrella brassicaformis	MMETSP1451	87.2
Alveolata	Chromera velia	MMETSP0290	83.7
Alveolata	Oxyrrhis marina	MMETSP1426	92.4
Alveolata	Karenia brevis	MMETSP0201	90.1
Alveolata	Tetrahymena thermophila	SRR1702718	99.4
Stramenopiles	Phytophthora infestans	SRR7405249	99
Stramenopiles	Peronospora belbahrii	ERR1578941	89
Stramenopiles	Aureococcus anophagefferens CCMP1850	SRR1300278	88
Stramenopiles	Aurantiochytrium sp. T66	SRR2910019	87
Telonemia	Telonema sp. P-2	SRR7371266	79.6
Centrohelida	Raineriophrys erinaceoides	SRR2170634	83.9
Centrohelida	Raphidiophrys heterophryoidea	SRR2170621	86.3
Centrohelida	Choanocystis sp. FB-2015	SRR2170626	83.9
Centrohelida	Acanthocystis sp. FB-2015	SRR2170625	61.2
Haptophyta	Calcidiscus leptoporus	SRR1300371	63.9
Haptophyta	Scyphosphaera apsteinii	SRR1300370	62.7
Haptophyta	Isochrysis galbana	SRR1300331	60.4
Haptophyta	Emiliania huxleyi	SRR1300289	65.9
Haptophyta	Prymnesium parvum	SRR1296710	65.9
Haptophyta	Pavlova lutheri	ERR2041160	55.3
Cryptista	Guillardia theta	SRR1294409	85.1
Cryptista	Rhodomonas salina	SRR1300353	65.1
Cryptista	Goniomonas pacifica	SRR1296724	73.3
Cryptista	Palpitomonas bilix	SRR1294410	77.7
Glaucophyta	Gloeochaete wittrockiana	SRR1300296	85.5
Chlorophyta	Ostreococcus tauri	SRR4308669	92.4
Chlorophyta	Micromonas CCMP2099	SRR1296697	96.5
Chlorophyta	Lobosphaera incisa	SRR5237726	93.1
Chlorophyta	Chlamydomonas reinhardtii	SRR1801249	85.4
Chlorophyta	Arabidopsis thaliana	SRR7781116	78
Chlorophyta	Oryza sativa	SRR6117352	90.1
Chlorophyta	Marchantia polymorpha	SRR3168960	85.2
Rhodophyta	Mazzaella japonica	SRR5357796	54.6
Rhodophyta	Gracilaria changii	ERR1411899	77.2
Rhodophyta	Cyanidioschyzon merolae	SRR5194807	69
Rhodophyta	Galdieria sulphuraria	SRR4450072	71.4
Ancoracysta	Ancoracysta twista	SRR6175506	67.1
Hemimastigophora	Spironema cf. multiciliatum	SRR6032743	57.2
Ancyromonadida	Nutomonas longa	SRR1617398	62.7
Malawimonadida	Malawimonas sp. strain 249	SRR5996795	95.3
Metamonada	Giardia lamblia	ftp://ftp.ebi.ac.uk/ensemblgenomes/pub/release-51/protists/fasta/giardia_lamblia/pep/Giardia_lamblia.GL2.pep.all.fa.gz	23.9
Metamonada	Dysnectes brevis	SRR3742548	40.8
Metamonada	Kipferlia bialata	DRR083618	37.2
Metamonada	Tritrichomonas foetus	SRR1696451	49.8
Metamonada	Trichomonas vaginalis	http://trichdb.org/trichdb/	53
Metamonada	Monocercomonoides sp. PA203	SRR2962868	51.8
Discoba	Rhynchopus euleeides	SRR5998382	33.1
Discoba	Diplonema sp. ATCC 50224	SRR5998375	45.4
Discoba	Trypanosoma brucei	http://tritrypdb.org/tritrypdb/	99.3
Discoba	Euglena gracilis	ERR974915	48.5
Discoba	Naegleria gruberi	ERR2215457	84.7
Discoba	Percolomonas cosmopolitus	SRR1296756	65.9
Discoba	Andalucia incarcerata	SRR2566811	75.7
Breviates	Pygsuia biforma	SRR766063	52.5
Fungi	Saccharomyces cerevisiae	SRR5963443	98.3
Fungi	Komagataella pastoris	SRR6705046	98.2
Fungi	Schizosaccharomyces pombe	DRR099434	80.9
Fungi	Claroideoglomus etunicatum	DRR041177	81.5
Fungi	Gigaspora rosea	SRR1979252	88.6
Fungi	Catenaria anguillulae	SRR424218	78.4
Fungi	Piromyces finnis	SRR5487626	86.9
Fungi	Gonapodya prolifera	SRR427152	81.8
Fungi	Batrachochytrium dendrobatidis	SRR3707435	87
Fungi	Encephalitozoon cuniculi	SRR769607	97.7
Fungi	Fonticula alba	SRR554360	53.4
Holozoa	Homo sapiens	ftp://ftp.ensembl.org/pub/release-104/fasta/homo_sapiens/pep/Homo_sapiens.GRCh38.pep.all.fa.gz	99.5
Holozoa	Xenopus tropicalis	SRR7639591	88.9
Holozoa	Danio rerio	ftp://ftp.ensembl.org/pub/release-99/fasta/danio_rerio/cdna/Danio_rerio.GRCz11.cdna.all.fa.gz	95.4
Holozoa	Drosophila melanogaster	ftp://ftp.flybase.net/genomes/Drosophila_melanogaster/dmel_r6.24_FB2018_05/fasta/dmel-all-transcript-r6.24.fasta.gz	99.9
Holozoa	Daphnia pulex	SRR5378537	79.3
Holozoa	Caenorhabditis elegans	DRR101405	97.4
Holozoa	Dicyema japonicum	DRR057371	61.9
Holozoa	Corticium candelabrum	SRR504694	72.8
Holozoa	Helgoeca nana	SRR6344981	93.7
Holozoa	Stephanoeca diplocostata	SRR6344982	93.7
Holozoa	Salpingoeca infusionum	SRR6344968	91
Holozoa	Capsaspora owczarzaki	SRR515476	65.9
Holozoa	Ichthyophonus hoferi	SRR1618711	62.4
Holozoa	Creolimax fragrantissima	SRR1029670	57.7
Holozoa	Sphaerothecum destruens	SRR1618479	82.7
Holozoa	Corallochytrium limacisporum	SRR1618598	80
Amoebozoa	Entamoeba histolytica	http://amoebadb.org/amoeba/	45.5
Amoebozoa	Dictyostelium discoideum	http://dictybase.org/db/cgi-bin/dictyBase/download/blast_databases.pl	94.9
Amoebozoa	Vermamoeba sp. Contaminant of CCAP 1503/5	SRR5396440	78
Amoebozoa	Acanthamoeba castellanii	SRR957287	84.3
CRuMs	Mantamonas plastica CCAP 1946/1	SRR5997433	62.3
CRuMs	Rigifila ramosa CCAP 1967/1	SRR5997435	89
* Proteome data was downloaded directly for seven species (Plasmodium falciparum, Toxoplasma gondii, Entamoeba histolytica, Trypanosoma brucei, Trichomonas vaginalis, Giardia lamblia and Homo sapiens); pre-assembled transcriptome data was downloaded directly for eight species (Chromera velia, Oxyrrhis marina, Karenia brevis and Vitrella brassicaformis, Paulinella chromatophora, Danio rerio, Droso…
