# Supplementary material
Source: publisher figshare collection journal article supplement (https://tandf.figshare.com/articles/dataset/_/19605934)
Supplement: Supplementary file 2 [file 1]

Data S1

A

Rhizaria\_Ammoniaseq\_71ATG7  
Rhizaria\_Globobuliminalseq\_74ATG7  
Rhizaria\_Eucyrtidiumseq\_73ATG7  
Rhizaria\_Bigelowiellalseq\_72ATG7  
Rhizaria\_Paulinellalseq\_76ATG7  
Rhizaria\_Paulinellalseq\_75ATG7  
Alveolata\_Toxoplasma[CEJ.74723.1]ATG7  
Alveolata\_Plasmodium[ETW30632.1]ATG7  
Alveolata\_Vitellina[CEJ.92350.1]ATG7  
Alveolata\_Chromera[A0A0G4F387]ATG7  
Alveolata\_Oxyrhiza[A0A673QY57]ATG7  
Alveolata\_Karenia[A0A674UE81]ATG7  
Alveolata\_Tetrahymenalseq\_01ATG7  
Stramenopiles\_Phytophthora[seq\_79]ATG7  
Stramenopiles\_Peronosporalseq\_78ATG7  
Stramenopiles\_Aureococcus[A0A6S9EG39]ATG7  
Stramenopiles\_Aurantiochytrium[seq\_77]ATG7  
Telonemia\_SRR7371266[seq\_80]ATG7  
Telonemia\_SRR7371266[seq\_81]ATG7  
Centrohelidia\_Raineriochytriseq\_17ATG7  
Centrohelidia\_Raphidophryse[seq\_18]ATG7  
Centrohelidia\_Choanocystis[seq\_15]ATG7  
Centrohelidia\_Choanocystis[seq\_16]ATG7  
Centrohelidia\_Acanthocystis[seq\_13]ATG7  
Centrohelidia\_Acanthocystis[seq\_14]ATG7  
Haptophyta\_Calcidiscalseq\_45ATG7  
Haptophyta\_Scyphosphaera[seq\_49]ATG7  
Haptophyta\_Scyphosphaera[seq\_48]ATG7  
Haptophyta\_Isochrysis[A0A670R228]ATG7  
Haptophyta\_Emiliana[XP\_005789984.1]ATG7  
Haptophyta\_Pymnesium[A0A6S9VW10]ATG7  
Haptophyta\_Pavloval[seq\_46]ATG7  
Cryptista\_Guillardia[XP\_005834743.1]ATG7  
Cryptista\_Rhodomonadalseq\_29ATG7  
Cryptista\_Goniomonas[A0A672DUH3]ATG7  
Cryptista\_Palpitomonas[seq\_28]ATG7  
Glaucophyta\_Gloeocharaeata[A0A671G744]ATG7  
Glaucophyta\_Gloeocharaeata[A0A670VLP9]ATG7  
Chlorophyta\_Ostreococcus[seq\_27]ATG7  
Chlorophyta\_Micromonas[seq\_26]ATG7  
Chlorophyta\_Lobosphaera[seq\_23]ATG7  
Chlorophyta\_Lobosphaera[seq\_24]ATG7  
Chlorophyta\_Lobosphaera[seq\_21]ATG7  
Chlorophyta\_Lobosphaera[seq\_24]ATG7  
Chlorophyta\_Lobosphaera[seq\_20]ATG7  
Chlorophyta\_Chlamydomonas[XP\_001703365.1]ATG7  
Chlorophyta\_Chlamydomonas[PNNW84948.1]ATG7  
Chlorophyta\_Arabidopsis[seq\_19]ATG7  
Chlorophyta\_Oryza[XP\_015615773.1]ATG7  
Sisirophyta\_Marchantia[seq\_25]ATG7  
Chlorophyta\_Marchantia[A0A631696.1]ATG7  
Ancoracysta\_Ancoracysta[seq\_31]ATG7  
Hemimastigophora\_Spironemal[seq\_50]ATG7  
Ancyromonadida\_Nutomonas[seq\_41]ATG7  
Malawimonadida\_Malawimonas[seq\_65]ATG7  
Metamonada\_Trichomonas[OH596604.1]ATG7  
Metamonada\_Trichomonas[DS113646-3-36765-38645]ATG7  
Metamonada\_Monoceromonoides[seq\_66]ATG7  
Discoba\_Rhyacozoa[seq\_31]ATG7  
Discoba\_Diplomonad[seq\_31]ATG7  
Discoba\_Trypanosoma[T9297\_10\_v5.1-6-2739506-2737149]ATG7  
Discoba\_Euglenal[seq\_32]ATG7  
Discoba\_Naegleriaseq\_33ATG7  
Discoba\_Percomonas[A0A6U1FMM3]ATG7  
Discoba\_Andalucia[seq\_30]ATG7  
Breviata\_Pygus[seq\_61]ATG7  
Breviata\_Pygus[seq\_61]ATG7  
Breviata\_Pygus[seq\_61]ATG7  
Breviata\_Pygus[seq\_61]ATG7  
Fungi\_Saccharomycetes[ED721648.1]ATG7  
Fungi\_Komagatellalseq\_42ATG7  
Fungi\_Schizosaccharomycetes[seq\_44]ATG7  
Fungi\_Claridoeomul[seq\_37]ATG7  
Fungi\_Claridoeomul[seq\_38]ATG7  
Fungi\_Gigasporal[seq\_40]ATG7  
Fungi\_Catenariaseq\_36ATG7  
Fungi\_Catenaria[QR240662.1]ATG7  
Fungi\_Pirromycetalseq\_43ATG7  
Fungi\_Gonapodyal[seq\_41]ATG7  
Fungi\_Batrachochytrium[seq\_35]ATG7  
Fungi\_Batrachochytrium[QAJ39464.1]ATG7  
Fungi\_Fonticulalseq\_39ATG7  
Metazoa\_Homo[Q95352]ATG7  
Metazoa\_Xenopus[KA661279.1]ATG7  
Metazoa\_Danio[A0A0ZKPR3]ATG7  
Metazoa\_Drosophilalseq\_70ATG7  
Metazoa\_Daphnia[EFX82614.1]ATG7  
Metazoa\_Caenorhabditis[seq\_67]ATG7  
Metazoa\_Dicymal[seq\_69]ATG7  
Metazoa\_Corticium[seq\_68]ATG7  
Holozoa\_Helgocael[seq\_58]ATG7  
Holozoa\_Stephanocael[seq\_64]ATG7  
Holozoa\_Salpiginet[seq\_62]ATG7  
Holozoa\_Capsasporal[KEJ9298.1]ATG7  
Holozoa\_Ichthyophon[seq\_59]ATG7  
Holozoa\_Ichthyophon[seq\_60]ATG7  
Holozoa\_Ichthyophon[seq\_61]ATG7  
Holozoa\_Creolimax[seq\_54]ATG7  
Holozoa\_Creolimax[seq\_56]ATG7  
Holozoa\_Creolimax[seq\_57]ATG7  
Holozoa\_Creolimax[seq\_52]ATG7  
Holozoa\_Creolimax[seq\_55]ATG7  
Holozoa\_Creolimax[seq\_53]ATG7  
Holozoa\_Sphaerostecum[seq\_63]ATG7  
Holozoa\_Coralochytrium[seq\_51]ATG7  
Amoebozoa\_Entamoeba[DS571196-6-71419-69677]ATG7  
Amoebozoa\_Dictyostelium[seq\_11]ATG7  
Amoebozoa\_Vermamoeba[seq\_2]ATG7  
Amoebozoa\_Acanthamoeba[XP\_004349643.1]ATG7  
CruMts\_Mantamonas[seq\_10]ATG7  
CruMts\_Mantamonas[seq\_55]ATG7  
CruMts\_Mantamonas[seq\_9]ATG7  
CruMts\_Rigifal[seq\_12]ATG7

1 DDLLKFDALLSNTDSTFWOELGRKLNELKLSSEEAIPFIFFTFTGGIAATLPPTVFNNDSENLSTELRPOYHFOGPCELLNTIKITETFKKLDKKQLREHAMRIVADNOSGAELSNPALLLYRF 122  
1 EVVLLKEDKLLSSSDSTFWOELGHHKIDDEFKLSSEDAIPFIFFTFTGGISVTLTPPKIFFNHNEEDLDTSLKFFHKYGPCELLNTIKITSEKEMOKQKLLHNHSMKLVDDILNQNYISNALLLYRF 122  
1 -----MG-----V 3  
1 CSPSLKFCPLSSAVDVSFWTOLSKKLNELKLNSSALSISAFTTTHSHSTVPLARLOVSSASLDDSPDFGPEFAVAIGOLHNOITLDFKNLDPGLAAEAANKIWHISILSGAALKNPBELLTDF 122  
1 RRVLKFCPTLSDISFWOKLEEKLRERWLOTWVLAVSRREKAVSSLSALRLDRTAFD-S-SCFTGDVPLGLFLYKNSLEOFKAROISOVLQAASAFITASPSSEELHAPSEMSYSF 121  
1 SYVLKHNNEFKIDISFWOKLEEKLRERWLOTWVLAVSRREKAVSSLSALRLDRTAFD-S-SCFTGDVPLGLFLYKNSLEOFKAROISOVLQAASAFITASPSSEELHAPSEMSYSF 122  
1 ARLKHSFPRVVVDISFWOELAAQODRMKLTTRFPIVAPHSASRTSGLRLTRSSFT-HTSSSLHHEWRTGLINVTLEEFKRSFKQLLDTVAALANSGAEBAESDDRAAL 121  
1 QQAVHFAFNVSDISFWOELSHRLDVLKISTTIEIVTGVFIAGADKTPGVRDLRLSELKTSKDEKVLVYGRVINFUTLDFKKFRLGAAGQVAAEEVAAEAESVSRBTALTRF 122  
1 GEHLFEFGVQSEVGVEFWORVQKNLEHORDVSRKLLWVFSSSSDQKVGAAVRFTDRSFE---DTCGCGCFHCPFWLVNITIEFAAFDQKGMVEKCLDAWAKAVASKEFMODPALLRLV 118  
1 SAPLRFTLSLSPADVFVWELTROLDIQRLDSSRLQOQAYFVAPKADVAEKFLRLREAFDLSCKFEAGSTRLRGKLNFIIMEEFKDSRAERSEVARSRLNDIVSGAALSDPELLRRF 122  
1 DKKFEIIPFSRMDIIGFVSLTAKKLEEWKLNSDAQIDIVKFKISNFTSKKAFNLVDVYSFOQELGQFVEIVIQTLKKNYNTIEEFKQHFYKDLTKQ-----OISADNLFCKDEAFIMK 117  
1 AQVLFKOPVNSAPDVSFWOTLTKLQVWLNDDQCGIIGYFTGRSNNVVARFTTIDESAFAAGQARREYEWAPGQLYNTITLFAFKKLDKSKLLRDAQRLDLDIL-NEEDTSIDHNSF 121  
1 AQVLFKOPVNSAPDVSFWOTLTKLQVWLNDDQCGIIGYFTGRSNNVVARFTTIDESAFAAGQARREYEWAPGQLYNTITLFAFKKLDKSKLLRDAQRLDLDIL-NEEDTSIDHNSF 121  
1 FETLRFAFSSARKVAFVQAVDARLDRMDVDRGARAIDGAWPGSSSGGARELASSVGGAGGEGALAAPGRLLTVNITVEAFRSDMKALLRDAADALADAMSGAMERFEVLGAG 122  
1 TSEVFEAFRSMVQGLVGVFSKALEQIMLSEAFVNLNVAWGLGAAIGALIRVLTGDDLLWSTSEDFNANFRATALLNITVAFKRLKKLLRDAADALADAMSGAMERFEVLGAG 122  
1 -----MTALKSHOFPQVLSYAL-----DFVTFBSHNDKVSVPSSFDAD-----V 46  
1 -----QLAHKLLHQYKLDTOAVALSEFFQCGNT-----RVALMDASDEDSVPPANRRISGSLIMMLTADFGSGDFQKLSSEDAQVQVWDAIRSGAALDDPELLRFR 98  
1 KELVKFCPTSTVDSAFWTLTKLTHQFKLDESERQIRARTTTTTSVPSRLCDHNAVDVDAGGIRFDVHGTIKLYNTIAFKNNKKLIFKLHAQKMDKCKGLSDHPHVMCRF 122  
1 --MLQFOPFVTTIDVSFWORLSEKKIKELKLSAALRIQGHFTCGLGQPPSRCLVEGAADFVDELQASKRHYVDGTLIHTITLLEEFKALDKRDIMQSGTMLWDAIRSGEAFSNPQLCRF 120  
1 --MLKFCPLVSSLELFWITELTRRVEVFMRLTDRVLTGFLLLPGCGGVENKFLGLDAFKDHVGRSHCARAPGQGLVNTIAEVEGLDKAALLKAAAEALHEAVRSGAAMTDPSLLG 118  
1 -----  
1 -----ALQ----- 3  
1 EATLRFRPLCGALDVSFLTELARRLHEFRLSDEPVEIRSSFLRASHQVAAPLCVGADAFSSGVEVPPTVCVVPGTLVNIANTLEDFKDWKQALLRTARTIWEVDHSGRALVEHRLSRF 94  
1 ADTLRFLPLSSAIDVSFLTELARRLHEFRLSDEPVEIRGTABSNHHEVASPLCVSADAFSSGVEVPPSLCVVPGTLVNIANTLEDFKDWKQALLRTARTIWEVDHSGRALVEHRLSRF 122  
1 DVLKFCPTTAAIDVFLTELARRLHEFRLSDEPVEIRHSSYARAERHEIRPFCVGADAFSSGVEVPPTMCVVPGTLVNIANTLEDFKDWKQALLRTARTIWEVDHSGRALVEHRLSRF 122  
1 -----  
1 --MLRIRPPASSLSDASFLSRLIASLHLHLRLSLRLPFTAFCLRHVQSSGOERLVAAADALDLDASAKRAVLITGEVITFMTIESFKELDKKQFLHNIATEMGROITGEEVENPSLVRG 120  
1 -----  
1 QEPLRYCLTFTSIEAARWKAFFSEKISRLKLSSEEDV-----RFLCDRASFDRES-LQAQAVGLGCEHLVDSIDDFKALDKKALLDQARRLOEKISSEKAEKDACLSV 69  
1 --KIAFO-----WRREGDMVAFVKKKGE-----DIGASLFLQKSNR-VGVSIKSHDVEGVIRNFSIDSFKSADKAGALQEEGKLRQYIASGEWVENARKLV 109  
1 --MOFVPIISFVDSFWTDLAKKLEEKYLNERRKLAGFYAVGSSREVAGRLCVKSSLDADVAPPAFNIITPGSLLNFTITIEFKADKNDILOOTAAQEIWNVLSGRAEANTSLNRF 119  
1 ARALAFAPASADGGFWARWAKMSSETMLRESSI-----SCACRVRAEISGAALDHESDGLNADGGGWWARGDARLLNRREGVITTFDREAFLREIGELIRDIESGAERDPSRLMR 118  
1 DVLKFCPTVQSAVDITFWAELARRLNDKGLREDVPIIDGLFACSMHAEVSSVALDKRSFETWTSLATQOARPGTLRRVNTFERFKVEYRQAMLDSEADAWRAVVSQDAARDPHLNOF 122  
1 MVLQFCPTVQSAVDITFWAELARRLNDKGLREDVPIIDGLFACSMHAEVSSVALDKRSFETWTSLATQOARPGTLRRVNTFERFKVEYRQAMLDSEADAWRAVVSQDAARDPHLNOF 121  
1 -----  
1 -----RHGLPDA 7  
1 -----  
1 -----GTA----- 3  
1 SDLCNAALQSVLDSFLAELTDLNLVLKLSSEEVVVGVYFSFNRYDSVPLRLTLDVSSLTAAASSRLDCHAAPGRVLVNTIEGFRSADKALMRRVAAEWIADISGAASEPRLTRF 121  
1 MGVIKFAQLQSVLDSFLAELTDLNLVLKLSSEEVVVGVYFSFNRYDSVPLRLTLDVSSLTAAASSRLDCHAAPGRVLVNTIEGFRSADKALMRRVAAEWIADISGAASEPRLTRF 122  
1 AIILOAFQSNSSVDEBFWHSSSLLDKLQDDSPISITBFGYPCGCGOVSNHLLTISESLDQECGNRNKCPVPGILNITVIESFNKLDKSLKAEANKIWDISGKALEDPVSLTRF 122  
1 BFLMCAAAICVCAETBFDALRRLDLVLQDDSPISITBFGYPCGCGOVSNHLLTISESLDQECGNRNKCPVPGILNITVIESFNKLDKSLKAEANKIWDISGKALEDPVSLTRF 122  
1 SSTRLMFAQVQSAVDITFWAELARRLNDKGLREDVPIIDGLFACSMHAEVSSVALDKRSFETWTSLATQOARPGTLRRVNTFERFKVEYRQAMLDSEADAWRAVVSQDAARDPHLNOF 122  
1 SSTLMFAQVQSAVDITFWAELARRLNDKGLREDVPIIDGLFACSMHAEVSSVALDKRSFETWTSLATQOARPGTLRRVNTFERFKVEYRQAMLDSEADAWRAVVSQDAARDPHLNOF 122  
1 CACVQAPTESAVEVTRWHELAKRLLEVMDLETDVVDHGTFTQITTSSETVRPSVLVHQADDAATLGLSKAPVTRGWMVNTVEEFKKVDKTLAQEQAAQLQAQCHDARN-LVLNKF 120  
1 KHELFKVPVSTIHSDFVLELERRIDLEYKLDNRDIAQGLVLSNNGOIPPLRLNRFSTFDOMLARSELPMWHTGLTCOPSLDAFKQADKNAALRESGKIWDAIRSGALDPSLLNRF 122  
1 GEVVKFVPVQSAVDITFWAELARRLNDKGLREDVPIIDGLFACSMHAEVSSVALDKRSFETWTSLATQOARPGTLRRVNTFERFKVEYRQAMLDSEADAWRAVVSQDAARDPHLNOF 117  
1 MDMRFPQTQSSVPELWELADRRDQDFMLSDAPITGLSCNTQIGIPPSLIAPGSAPFS-SERFNINMFAPVGAHHKQITMEGFKQADKSSLEECAKIMWDIRSGAVERDAPLQRF 119  
1 --MATFQOASIIAIEPSFHWALSKOKLNDMLDERPESFVAYQFCQGRSGISSFLFNEESESQTOQYLNATYKALITGLTLVTKNNFSLDRAGILKSLSDSIFQAEITRSWLEQSSLLK 120  
1 --MSFONISSLIESFWALNKLNDKMLDETFRDIIISYQFAGRSAGVKAFAPINEDSPKKEFLNVLGTFTFIPTYLNTIKSPFKKLRDKNLSKAEINKNINSEWNNPISLLK 119  
1 SKDLKFCPTSSPILFWKVLSEKLDVLKSDDAVIGVFCSCGTEERASHFLFDENAFEGASKREHHYAVPGLSILNITWDAKLLNFKQGLLEDAKGLIKLAKLELHELEHSELR 121  
1 CMARFEKSHAKVEFWFKHMSKLELTKLSDDAVIGVFCSCGTEERASHFLFDENAFEGASKREHHYAVPGLSILNITWDAKLLNFKQGLLEDAKGLIKLAKLELHELEHSELR 122  
1 NTNADQEKSIITKCYFMSLSLDDKWLKDAEISAILVMSLSLDDKSLSEKQVPSIYEAVIPGTUKCHNITETAEAVDRKSILHSECDKLDQIRSEFLKNQONLH 122  
1 MERLKLMDRFRIISFWYELKRLHEWLESEPIIVWFSYRSLVSSLSASRNVTNRLRLD-ETSLRCVHTLHOGIFONTAKQYOLPRRSALWDILKKCKNREESSAEELAVNFSI 121  
1 STLLOFELACRVEFWFELEKRLHKEYGVDFEIVGVSAGHGVSSPVAVAEEGAAPD-ATGVFGRIGOLLTNTLEELKRSQGLIAAAGAEWAAQEGAWLORGLNRF 122  
1 -----YHANTIEEFNNYDKKSLRNVGLIEYNKIVNQGWLKNPNEITHF 44  
1 KMKIKKAKIRLLDQEWTFATQKEITHKKLDLDTIKTYGTIAAGNEMNRVQOTRIGESLRERKIGRDMGSIAGKYKKNQKEEFAIKIKDFVRE-----FEKVFDDSEQEIISILNOF 118  
1 KRNVLVFPKPIVDVQVFWLEHRRKLEEWKLDERRPSSASFATSSYSSFSVPFNKESDV-----STQDPRMKGTLLINIVGSDHAKRKSILAE-----EWSHIFSDKTRMFLV 114  
1 -----MDVCSFAPKQOL-----SPHIEDGLLALVDYSSFAFLGQPSRWVWFSEFRAADKVAK-----GLDL 64  
1 -----  
1 -----EARS----- 4  
1 MNTLOELPLSSSGVGVFVSLVGGKLEEWKNDVAFQSLQGYTYSVPS-----LSSKFFDELADEFKFS-STFKVKVPGKILIFNLDFKAFNKKKDLHTLQKISASVESEGLDPELLR 119  
1 ERLVNLAPFKSFLDSTFFQELSRLLDLNVLKLDSTQVNLDLHNIKASQADVPLFNTRSFENNKNRINEVPLQSGIFRVLDFEKNLQKQLFHORALEOVEDGIKINKCVS-----F 117  
1 SMDIPYSQISFVSSNDSFQKLLDNKLYRLDDTDKAIQVDFDKIVG-NORTSLVDSESHNNINTYTHAQFVKGILIKKLLVDFFRKVDVQFLQSGKLVQDQKLSKLT 121  
1 GKALOFQSHSSIDATFWHOLSNYVEKOKLDAHLITHKFNTRYR-----GNISIVFGEABSN-SNIDKDLAETGLLNATPOEFTNVKREEGEV-----LNSIKGVSVSRNLLRF 112  
1 SBLVOVAFSSAVEATFTSTRKLDLYKDDTSHLDLYFTGHTIISMRAPCLNSGADDDATLPPFSYPSIGKIKNTITVDFKALDKTALFEITEQIWDIKSGEAVKNVYLLTRF 122  
1 SNLVOFVSSAVEATFWHTLSTRKLDLYKDDTPOSILBYSVYSYLITMPLRYLIGTAFOATLPPFISYSGAKNTITIEFKNLDKNAFPRETAEGWKDILISGAARKDPVYLTRF 122  
1 --MDPFCOSVSGVFWHLKATLETLKLDSDAPICARAIITQSIALBASISLSBTLDFTFAPRISTVYPTKNTITIEFKNLDKNAFPRETAEGWKDILISGAARKDPVYLTRF 119  
1 RRALVLAQSHHOARNAQARRLAHLFTTHARRHHPAIRVAFDLGNS-RTARLVAALHLARAHAPRISTVYPTKNTITIEFKNLDKNAFPRETAEGWKDILISGAARKDPVYLTRF 122  
1 KTVLVOFSSLSVDEFTWYSLTGNEIKIKSDVLTGIEYYSYNSIKVPSLNDVNSLTNEI-IPSFSPKGLKNTITIEFKNLDKNAFPRETAEGWKDILISGAARKDPVYLTRF 120  
1 MSPLOFQSFQTCVASTFWHLRDLDAFRLDDQKRIWASYSLSHTNSPFIISLGYEATDLAVFSSAIPVPGITINTLDEFKSLDKROALADAQGLWDDISGAALACDPLLRF 122  
1 SKILOVFPQSAVDITFWHTLSGNINLYKLDASVIGQFYSSGADALSRLCVSSTSFSKIQRPDSRSCIPVGLVKNITITIEFKSVQKNSLKTYSVLEIWDILSAAVADPLTLNK 122  
1 DKLLFAPFVRIRIEHGFWDALVKNHDAVARLSDAPITAFYSPLHRASVELDLMVFNHESLSTSSRGASVACRGTLVYVLFSPQNADRNALIKAEAAELWADIVASGKPGATVAQR 122  
1 LSKLOFAPSSALDVBFWHELTKQKLENYRDEAPKIKBYYNNDQSAELPRLTLEFSAFDMAPTARCCPAGITLYNTITIEFSKTAADKLLLEQAANEIWESGKSTALENVLNKF 122  
1 DAKLOFPTLSALDVBFWHELTKQKLENYRDEAPKIKBYYNNDQSAELPRLTLEFSAFDMAPTARCCPAGITLYNTITIEFSKTAADKLLLEQAANEIWESGKSTALENVLNKF 122  
1 SKILOFAPSSALDVBFWHELTKQKLENYRDEAPKIKBYYNNDQSAELPRLTLEFSAFDMAPTARCCPAGITLYNTITIEFSKTAADKLLLEQAANEIWESGKSTALENVLNKF 122  
1 EIILOFAPVSSVSTFWHLKLAELDHDRLSDSKRSITHTYTNRNA-SCQLLEVDTYANRMKPKFHSIAISTYIKNTIEFKALDKQLLDAKELLDADMCGGALRDPSSLTRF 120  
1 EKILQFLPSSVLSFSSFWHLKLTQMDVYALNDVEITHTYTNQNSISRLAEALNDYSSFENRQVGTNIGICOLLQNTITIEFAKDINKOTAINKCEQWINDILSAAALSNPSSLTRF 122  
1 --MATFVPTCLDITFWNEVKNKLNDKMLDETFCISQSLSLHQTEEFKCHLSLYDSLSL-ESTTGLSMGTLTYNTIESFKMDKSLIRSEAKIWESITRKLWNPLRSLRF 118  
1 --MKFVPTNTIDTEFWKLSTRLENLRLSEKRVIMGHYSTKIG-ETNNSLIGGESLDEIE-PSFVEVIRGELIYMKSNKSFRE-AQKIVEEKSOFTWTLDPQLFERPQIMOF 115  
1 -----IESVSGRAVNDPSLLVDF 18  
1 -----MEFKSAVINAAVQT-----IVASITSGALKDSSLLVKF 35  
1 -----  
1 -----FTITQT----- 7  
1 AKLMOFPTSSADASFWHTLQKLESEFKLDESALHEWMAKSSGLDFVARLSLTATAFQPLDSQOONAAIRGVLHNANSNSFKAFEMTSAPRTASALGASIRDSVSKNSYLTDF 122  
1 MRLQFAPSSADASFWHTLQKLESEFKLDESALHEWMAKSSGLDFVARLSLTATAFQPLDSQOONAAIRGVLHNANSNSFKAFEMTSAPRTASALGASIRDSVSKNSYLTDF 122  
1 -----V----- 2  
1 -----  
1 -----DG----- 58  
1 MSLLFLPLASSAEVAFVYYSROLENIRLSEEL-----LSDAVENVGTGPHLVLDLDFKNIDKQALLLETASKLWDDITSGRALSDPGLNLRV 36  
1 ----- 1  
1 -----  
1 ENILOAFBESAVDAGFWHLTORLDIYKLSDSPOSIHAYYACGEGVPPRCIGSOAFSCYSEVSIRNFVAPGTFLNLTAEFKNLDKKALLEKFSQLQWDRISGAAVSNPSLLSRF 122  
1 -----MIRPOFFRALSQLLEVRLDEETEREIFSTVQLGLDPTTLARVRLDNLAEEDKSDPRNVVHGTVLNLTIEFKRLNAQITIDSGAVLWDDLLKQWDDPSRLGRF 111  
1 TMTLOKFLDLQIDVTFWHEFTKRLLEVFLSEKAIPIYS-----EASGNIILRTHAFSE-----ROESCELELLNYLTISFKESKALKIYTE-----FSERCKLNEENSIWAK 104  
1 INTAKKESSFNIVITKYEFSNKLDELKLSSEISILNGHYTFSSQSDGLFLCFLFNARLNNVPLPRSYLSHGLYVNLVWDDQKSPKIKLENDASKRIVNNNDIKDSTLSLRF 122  
1 -----  
1 GQLLOFEGVESRSSSSSPRPRVLAHYPIGHHQO-----TTTTTAARVLPRLLEASADAPPHTRKYHFVPGCELLNTITIEFAHALDKKQOLDVAAKWTDIESGEALREPRRLCRF 118  
1 KSNLOFEPVLSQVGTWHELSRMDELKLDSSIEIFHYGTITTSISAAKLKLDACGEQON-TEAYHYPIGTLVNTITIEGKKFED-SLLKEAGSIWESIVSGDALTTSSLLNRF 119  
1 -----  
1 ARPLQFQVSSHCDARWHTLADRLINVLRLHGTILRIFSTYFVAHTHSLAPVFDOLSFQNTSASCMFPIGTIHLVDSLEAFKAVDKARLEHDAKPAWEALISGAALENPSLVNI 122

[illegible]



**Rhizaria**, *Ammoniumia*[seq\_71]ATG7  
**Rhizaria**, *Globobulimina*[seq\_74]ATG7  
**Rhizaria**, *Eucyrtidium*[seq\_73]ATG7  
**Rhizaria**, *Bigelowella*[seq\_72]ATG7  
**Rhizaria**, *Paulinella*[seq\_76]ATG7  
**Rhizaria**, *Paulinella*[seq\_75]ATG7  
**Alveolata**, *Toxoplasma*[CEL74723].1ATG7  
**Alveolata**, *Plasmodium*[CEL74723].1ATG7  
**Alveolata**, *Vitrella*[CEL92350].1ATG7  
**Alveolata**, *Chromera*[AOA004F387].3ATG7  
**Alveolata**, *Oxyrhiza*[OA06V3QY5T].1ATG7  
**Alveolata**, *Karenia*[OA06T4U8BE].1ATG7  
**Alveolata**, *Tetrahymena*[seq\_Q1]ATG7  
**Stramenopiles**, *Phytophthora*[seq\_79]AT7  
**Stramenopiles**, *Peronospora*[seq\_78]AT7  
**Stramenopiles**, *Aureococcus*[OA06S9EG39].ATG7  
**Stramenopiles**, *Phaeodactylum*[seq\_77]ATG7  
**Telonomia**, *SRR371266*[seq\_80]ATG7  
**Telonomia**, *SRR371266*[seq\_81]ATG7  
**Centrohelida**, *Rainieriphyllus*[seq\_71]ATG7  
**Centrohelida**, *Raphidocystis*[seq\_18]ATG7  
**Centrohelida**, *Choanocystis*[seq\_19]ATG7  
**Centrohelida**, *Choanocystis*[seq\_18]ATG7  
**Centrohelida**, *Acanthocyrtis*[seq\_13]ATG7  
**Centrohelida**, *Acanthocyrtis*[seq\_14]ATG7  
**Haptophyta**, *Caldicetus*[seq\_48]AT7  
**Haptophyta**, *Scyphosphaera*[seq\_49]ATG7  
**Haptophyta**, *Scyphosphaera*[seq\_48]ATG7  
**Haptophyta**, *Isocyrtis*[OA06TOR22B].ATG7  
**Haptophyta**, *Isocyrtis*[OA06TOS3V2].ATG7  
**Haptophyta**, *Emiliania*[XP\_005789984.1]ATG7  
**Haptophyta**, *Pyrrenomonas*[OA06S9VWL0].ATG7  
**Haptophyta**, *Favosites*[seq\_46]ATG7  
**Cryptista**, *Gullardia*[XP\_005834743.1]ATG7  
**Cryptista**, *Rhodomonas*[seq\_29]ATG7  
**Cryptista**, *Comamonas*[OA06T2DUH3].ATG7  
**Cryptista**, *Palpitomona*[seq\_28]ATG7  
**Glaucochyta**, *Gloeochaete*[OA06TGVL944].ATG7  
**Glaucochyta**, *Gloeochaete*[OA06TGYL7P].ATG7  
**Chlorophyta**, *Ostreococcus*[seq\_27]ATG7  
**Chlorophyta**, *Micromonas*[seq\_26]ATG7  
**Chlorophyta**, *Lobosphaera*[seq\_21]ATG7  
**Chlorophyta**, *Lobosphaera*[seq\_22]ATG7  
**Chlorophyta**, *Lobosphaera*[seq\_21]ATG7  
**Chlorophyta**, *Lobosphaera*[seq\_20]ATG7  
**Chlorophyta**, *Chlamydomonas*[XP\_00703365.1]ATG7  
**Chlorophyta**, *Chlamydomonas*[PNW84948.1]ATG7  
**Chlorophyta**, *Arabidopsis*[seq\_19]ATG7  
**Chlorophyta**, *Oryzax*[XP\_0587173.1]ATG7  
**Chlorophyta**, *Oryzax*[XP\_0587173.1]ATG7  
**Chlorophyta**, *Marchantia*[OAE31696.1]ATG7  
**Anacorcyta**, *Anacorcyta*[seq\_31]ATG7  
**Hemistastogophora**, *Spironema*[seq\_50]ATG7  
**Anycronomadina**, *Nutomonas*[seq\_41]ATG7  
**Malawinomadina**, *Malawinomonas*[seq\_65]ATG7  
**Metamonada**, *Trichomonads*[OH596604.1]ATG7  
**Metamonada**, *Trichomonads*[D13946-3-36765-36645]ATG7  
**Metamonada**, *Trichomonads*[seq\_66]ATG7  
**Discoba**, *Rhynchopus*[seq\_34]ATG7  
**Discoba**, *Diplonema*[seq\_31]ATG7  
**Discoba**, *Trypanosoma*[TB927\_10\_v5-1e-2-373506-2737149]ATG7  
**Discoba**, *Euglenales*[seq\_32]ATG7  
**Discoba**, *Naegleriales*[seq\_33]ATG7  
**Discoba**, *Percomonads*[OA06U1FMH3].ATG7  
**Discoba**, *Andalucia*[seq\_30]ATG7  
**Breviates**, *Pysyllae*[seq\_61]ATG7  
**Breviates**, *Pysyllae*[seq\_61]ATG7  
**Breviates**, *Pysyllae*[seq\_61]ATG7  
**Breviates**, *Pysyllae*[seq\_71]ATG7  
**Fungi**, *Saccharomyces*[EDJ271648.1]ATG7  
**Fungi**, *Komagataella*[seq\_42]ATG7  
**Fungi**, *Schizosaccharomyces*[seq\_44]ATG7  
**Fungi**, *Claroideoglommus*[seq\_38]ATG7  
**Fungi**, *Gigasporales*[seq\_40]ATG7  
**Fungi**, *Catenaria*[seq\_39]ATG7  
**Fungi**, *Catenaria*[ORZ40662.1]ATG7  
**Fungi**, *Pirionymys*[seq\_43]ATG7  
**Fungi**, *Gonapodytes*[seq\_41]ATG7  
**Fungi**, *Batrachochytrium*[seq\_35]ATG7  
**Fungi**, *Batrachochytrium*[OA39464.1]ATG7  
**Fungi**, *Funticulales*[seq\_39]ATG7  
**Metazoa**, *Homo*[95532]ATG7  
**Metazoa**, *Xenopus*[KA686729].1ATG7  
**Metazoa**, *Danio*[RER1013].ATG7  
**Metazoa**, *Drosophila*[seq\_70]ATG7  
**Metazoa**, *Cephalopoda*[EFX82614.1]ATG7  
**Metazoa**, *Daphnia*[seq\_61]ATG7  
**Metazoa**, *Corymbeles*[seq\_69]ATG7  
**Metazoa**, *Dicelyme*[seq\_68]ATG7  
**Holozoa**, *Heliocelis*[seq\_58]ATG7  
**Holozoa**, *Staphenoceles*[seq\_64]ATG7  
**Holozoa**, *Salpingoeca*[VF17].ATG7  
**Holozoa**, *Capasaporis*[KEJ92398.1]ATG7  
**Holozoa**, *Ichthyophonius*[seq\_59]ATG7  
**Holozoa**, *Ichthyophonius*[seq\_60]ATG7  
**Holozoa**, *Ichthyophonius*[seq\_61]ATG7  
**Holozoa**, *Creolimax*[seq\_54]ATG7  
**Holozoa**, *Creolimax*[seq\_54]ATG7  
**Holozoa**, *Creolimax*[seq\_57]ATG7  
**Holozoa**, *Creolimax*[seq\_52]ATG7  
**Holozoa**, *Creolimax*[seq\_55]ATG7  
**Holozoa**, *Creolimax*[seq\_53]ATG7  
**Holozoa**, *Sphaerothericum*[seq\_63]ATG7  
**Holozoa**, *Corallorchythium*[seq\_51]ATG7  
**Amoebozoa**, *Entamoeba*[DS571196-6-71419-69677]ATG7  
**Amoebozoa**, *Dictyostelium*[seq\_1]ATG7  
**Amoebozoa**, *Vermamoeba*[seq\_2]ATG7  
**Amoebozoa**, *Acanthamoeba*[XP\_00439643.1]ATG7  
**Crums**, *Mentomonas*[seq\_10]ATG7  
**Crums**, *Mentomonas*[seq\_9]ATG7  
**Crums**, *Riofilices*.12ATG7  
242 **Crums**, *Riofilices*.12ATG7





*Rhizaria*, *Glabronella*seq\_71ATG7  
*Rhizaria*, *Ambloimulina*seq\_74ATG7  
*Rhizaria*, *Eucyrtidium*seq\_73ATG7  
*Rhizaria*, *Bigelowella*seq\_72ATG7  
*Rhizaria*, *Paulinella*seq\_76ATG7  
*Rhizaria*, *Paulinella*seq\_75ATG7  
*Alveolata*, *Toxoplasma*CEL74723.1ATG7  
*Alveolata*, *Pfiesteria*seq\_70ATG7  
*Alveolata*, *Vitrella*(CJ92350.1)ATG7  
*Alveolata*, *Chromera*AOA004F387ATG7  
*Alveolata*, *Oxyrhiza*AOA6V3OY5TATG7  
*Alveolata*, *Karenia*AOA6U4UEBIATG7  
*Alveolata*, *Tritonympha*seq\_01ATG7  
*Stramenopiles*, *Phytophthora*seq\_79ATG7  
*Stramenopiles*, *Peronospora*seq\_78ATG7  
*Stramenopiles*, *Aureococcus*AOA6S9EG39ATG7  
*Stramenopiles*, *Phaeodactylum*seq\_77ATG7  
*Telomelia*, *SRR731266*seq\_80ATG7  
*Telomelia*, *SRR731266*seq\_81ATG7  
*Centrohelida*, *Raineriophrys*seq\_17ATG7  
*Centrohelida*, *Raphidochrysis*seq\_18ATG7  
*Centrohelida*, *Choanocystis*seq\_15ATG7  
*Centrohelida*, *Choanocystis*seq\_16ATG7  
*Centrohelida*, *Acanthocystis*seq\_13ATG7  
*Centrohelida*, *Acanthocystis*seq\_14ATG7  
*Haptophyta*, *Caldicladius*seq\_47ATG7  
*Haptophyta*, *Scyphosphaera*seq\_49ATG7  
*Haptophyta*, *Scyphosphaera*seq\_48ATG7  
*Haptophyta*, *Isochrysis*(AOA6TOR228)ATG7  
*Haptophyta*, *Isochrysis*(AOA6TOS3V2)ATG7  
*Haptophyta*, *Emiliania*XP\_005789984.1ATG7  
*Haptophyta*, *Pyrenium*AOA6S9VWL01ATG7  
*Haptophyta*, *Pavlova*seq\_46ATG7  
*Haptophyta*, *Pavlova*seq\_47ATG7  
*Cryptista*, *Gulldonia*seq\_005834743.1ATG7  
*Cryptista*, *Rhodomonas*seq\_29ATG7  
*Cryptista*, *Goniomonas*(AOA6T2DUH3)ATG7  
*Cryptista*, *Palpitomonas*seq\_28ATG7  
*Glaucophyta*, *Gloeochaete*(AOA6TG197)ATG7  
*Glaucophyta*, *Gloeochaete*(AOA6T0DYL6)ATG7  
*Chlorophyta*, *Ostreococcus*seq\_27ATG7  
*Chlorophyta*, *Micromonas*seq\_26ATG7  
*Chlorophyta*, *Lobosphaera*seq\_23ATG7  
*Chlorophyta*, *Lobosphaera*seq\_22ATG7  
*Chlorophyta*, *Lobosphaera*seq\_21ATG7  
*Chlorophyta*, *Lobosphaera*seq\_24ATG7  
*Chlorophyta*, *Chlamydomonas*XP\_001073365.1ATG7  
*Chlorophyta*, *Chlamydomonas*PNW84948.1ATG7  
*Chlorophyta*, *Arabidopsis*seq\_19ATG7  
*Chlorophyta*, *Oryza*seq\_21ATG7  
*Chlorophyta*, *Marchantia*seq\_23ATG7  
*Chlorophyta*, *Marchantia*(OAEC31696.1)ATG7  
*Anacorcyta*, *Anacorcyta*seq\_31ATG7  
*Hemistastogophora*, *Spironema*seq\_50ATG7  
*Ancyromonadida*, *Nutomonas*seq\_41ATG7  
*Malawimonadida*, *Malawimonas*seq\_65ATG7  
*Metamonada*, *Trichomonas*(OH596604.1)ATG7  
*Metamonada*, *Trichomonas*D313946-3-36765-36645ATG7  
*Metamonada*, *Trichomonas*seq\_66ATG7  
*Discoba*, *Rhychnops*seq\_34ATG7  
*Discoba*, *Diplonema*seq\_31ATG7  
*Discoba*, *Trypanosoma*(TB927\_10\_v5-1-6-273956-2737149)ATG7  
*Discoba*, *Euglenales*seq\_32ATG7  
*Discoba*, *Naegleriales*seq\_33ATG7  
*Discoba*, *Percomonas*(AOA6U1FMN3)ATG7  
*Discoba*, *Andalucia*seq\_30ATG7  
*Breviata*, *Pysyllus*seq\_61ATG7  
*Breviata*, *Pysyllus*seq\_61ATG7  
*Breviata*, *Pysyllus*seq\_61ATG7  
*Breviata*, *Pysyllus*seq\_71ATG7  
*Fungi*, *Saccharomyces*EDJ271648.1ATG7  
*Fungi*, *Komagataella*seq\_42ATG7  
*Fungi*, *Schizosaccharomyces*seq\_44ATG7  
*Fungi*, *Claroideoglomeris*seq\_37ATG7  
*Fungi*, *Claroideoglomeris*seq\_38ATG7  
*Fungi*, *Gigasporaceae*seq\_39ATG7  
*Fungi*, *Catenarial*seq\_36ATG7  
*Fungi*, *Catenarial*seq\_36ATG7  
*Fungi*, *Catenarial*(ORZ40662.1)ATG7  
*Fungi*, *Pirionymys*seq\_43ATG7  
*Fungi*, *Gonapodytes*seq\_41ATG7  
*Fungi*, *Batrachochytrium*seq\_31ATG7  
*Fungi*, *Batrachochytrium*(QA39464.1)ATG7  
*Fungi*, *Fonticulites*seq\_39ATG7  
*Metazoa*, *Homo*(O935352)ATG7  
*Metazoa*, *Xenopus*(XEN000000.1)ATG7  
*Metazoa*, *Drosophila*AOA002KPR3ATG7  
*Metazoa*, *Drosophila*seq\_70ATG7  
*Metazoa*, *Caenorhabditis*EFX82614.1ATG7  
*Metazoa*, *Daphnia*seq\_67ATG7  
*Metazoa*, *Corymella*seq\_69ATG7  
*Metazoa*, *Dicelyme*seq\_68ATG7  
*Holozoa*, *Helgocelis*seq\_58ATG7  
*Holozoa*, *Stephanocalyx*seq\_64ATG7  
*Holozoa*, *Salpingoeca*seq\_63ATG7  
*Holozoa*, *Capsasporum*KJE92398.1ATG7  
*Holozoa*, *Ichthyophonius*seq\_59ATG7  
*Holozoa*, *Ichthyophonius*seq\_60ATG7  
*Holozoa*, *Ichthyophonius*seq\_61ATG7  
*Holozoa*, *Creolimax*seq\_54ATG7  
*Holozoa*, *Creolimax*seq\_56ATG7  
*Holozoa*, *Creolimax*seq\_57ATG7  
*Holozoa*, *Creolimax*seq\_52ATG7  
*Holozoa*, *Creolimax*seq\_55ATG7  
*Holozoa*, *Creolimax*seq\_53ATG7  
*Holozoa*, *Sphaerothecum*seq\_63ATG7  
*Holozoa*, *Corallorhynchus*seq\_62ATG7  
*Amoebozoa*, *Entamoeba*(DS571196-6-71419-69677)ATG7  
*Amoebozoa*, *Dicystostellium*seq\_1ATG7  
*Amoebozoa*, *Vermamoeba*seq\_2ATG7  
*Amoebozoa*, *Acanthamoeba*XP\_00439643.1ATG7  
*CrUMs*, *Montanina*seq\_11ATG7  
*CrUMs*, *Montanina*seq\_11ATG7  
*CrUMs*, *Montanina*seq\_9ATG7  
*CrUMs*, *Rafflesia*seq\_12ATG7

|                                                          |                                           |       |
|----------------------------------------------------------|-------------------------------------------|-------|
| Rhizaria_Amonia[seq_71]ATG7                              | 593 LKVLNDTKYLEKVSGLQKLEIIDLVDMDVDDIDEED  | 630   |
| Rhizaria_Globobulimina[seq_74]ATG7                       | 594 IKTLNEPKYIEIVSGLNKLKDDIDLIDMDVDDDDGML | 631   |
| Rhizaria_Eucyrtidium[seq_73]ATG7                         | 354 LEVLRSPAYLEDVTGKELMSKIDDFDCAWDEEDSAEE | 391   |
| Rhizaria_Bigelowiella[seq_72]ATG7                        | -----                                     | ----- |
| Rhizaria_Paulinella[seq_78]ATG7                          | 518 -----KQKQKEKV-----                    | 523   |
| Rhizaria_Paulinella[seq_75]ATG7                          | 107 MSRLNCOILEDCGTLQKKEADQLQMDMEIEDD      | 143   |
| Alveolata_Toxoplasma[CEL74723.1]ATG7                     | 606 QEVIASSSVLEKVSGLDMQRIEARBEDADVIGLSDE  | 643   |
| Alveolata_Plasmodium[ETW30632.1]ATG7                     | 604 LVVGENPEFKELCDIEEGDDHNEEANDEVEEKSDEN  | 641   |
| Alveolata_Vitrella[CEL92350.1]ATG7                       | 596 TVQVHDPCHLESVSGRVFMKMSRVEEDVIQIDDEEL  | 633   |
| Alveolata_Chromera[AAOAG4F3B7]ATG7                       | 608 LRVLRDRVLELERSVGLSEFKEREARATQKGGVGGV  | 645   |
| Alveolata_Oxyrhiza[AAO6V3QY57]ATG7                       | 588 QRVTANSSITLERMSGLEEMKQRLQSFMDLDDFEPL  | 624   |
| Alveolata_Karenia[AOAGT4UBE1]ATG7                        | 597 MRVADSSLEELISGLAAMKAHNAFDEFDDFDDGAPD  | 634   |
| Alveolata_Tetrahymena[seq_0]ATG7                         | 601 QRVINDDVYLQVTKLSELLRDLDTDAFTEVDD----  | 634   |
| Stramenopiles_Phytophthora[seq_79]ATG7                   | 606 EMAGNSSAYLEELTGUNLTKAADALVIDLESDDEGE  | 643   |
| Stramenopiles_Personospora[seq_78]ATG7                   | -----                                     | ----- |
| Stramenopiles_Aureococcus[AOAGS9EG39]ATG7                | 592 AAVAADPAHLAVSGLTKKADVDG-----YEDDDDDF  | 625   |
| Stramenopiles_Aurantiochytrium[seq_77]ATG7               | 609 LQAFNKPDFLEDLTGLDTRLNSASLDDDLDDFDDD   | 646   |
| Telonemia_SFR7371266[seq_80]ATG7                         | 514 IKCMNDRHMDVTVGLRAEKEAMEAKYANWEDDDLD   | 561   |
| Telonemia_SFR7371266[seq_81]ATG7                         | 583 IQAFNNRTYLEDLTGITALKACEDSDSDFDWSDEEQ  | 620   |
| Centrohelida_Raineriophrys[seq_17]ATG7                   | -----                                     | ----- |
| Centrohelida_Raphidiophrys[seq_13]ATG7                   | 611 FSAFDDPLFLERFTGLDDVKRKAESMDVWDGDDLL   | 648   |
| Centrohelida_Choanocystis[seq_15]ATG7                    | 607 FRAFNEPSFLEDLAGVSQMLAAEQSQANWEDDDL    | 644   |
| Centrohelida_Choanocystis[seq_16]ATG7                    | 605 LRAFGEPSFLEDLVAGLITAMKAADAMSGFDDADG   | 642   |
| Centrohelida_Acanthocystis[seq_13]ATG7                   | -----                                     | ----- |
| Centrohelida_Acanthocystis[seq_14]ATG7                   | 170 MNCFNDRFTFTITGLAEKKATEIVSYESEEEEEEE   | 207   |
| Haptophyta_Calcidiscus[seq_45]ATG7                       | 318 RDALNHGSLYLEDLTGLSAMQKQAEASFDEADDEDL  | 355   |
| Haptophyta_Scyphosphaera[seq_49]ATG7                     | 143 LEAFNRGSLYLEDLTGLSKMHHEAEAFFDEPSEVD   | 180   |
| Haptophyta_Scyphosphaera[seq_48]ATG7                     | -----                                     | ----- |
| Haptophyta_Isochrysis[AOAGT0R228]ATG7                    | 580 MEAFNGGTFFLEELTGLQAMHREAEAALEVDL      | 617   |
| Haptophyta_Isochrysis[AOAGT0S3V2]ATG7                    | 608 LEAFNGGAFLEELTGLQAMHREAEADLFDDVEE     | 645   |
| Haptophyta_Emiliania[XP_005789984.1]ATG7                 | 607 LQAFNGGVLEELTGLQAMHREAEAALEDVFFDEDED  | 644   |
| Haptophyta_Pymnesium[AOAGS9VWLQ]ATG7                     | 611 MSAFNSSSYLEDLTGLTEMHRETEAAGLASECD     | 648   |
| Haptophyta_Pavlova[seq_46]ATG7                           | -----                                     | ----- |
| Haptophyta_Pavlova[seq_47]ATG7                           | -----                                     | ----- |
| Cryptista_Guillardia[XP_005834743.1]ATG7                 | 138 LRAFNEPDFLEIFSGURELHKQAAEIAEVL        | 175   |
| Cryptista_Rhodomonas[seq_29]ATG7                         | 607 LRAFNEPNFLEEASGLTMDLREGEALMEDWDEVEEL  | 644   |
| Cryptista_Goniomonas[AOAGT0DUH3]ATG7                     | 467 LQAFNEPDFLEELSGUKEFLKAADDMDWDEDE      | 504   |
| Cryptista_Palpitomonas[seq_28]ATG7                       | 548 LRVFNENFLEDLTGITEMRALADKEDIWSDDEEDDM  | 584   |
| Glaucophyta_Gloeochaete[AOAGT1G744]ATG7                  | 580 ARVVSGRGELQISGLAAFNASITAEVEEVVD       | 617   |
| Glaucophyta_Gloeochaete[AOAGT0VLP9]ATG7                  | 458 LRCONDSAVIEEVCGLAEDRLDVDVIEFELO       | 489   |
| Glaucophyta_Ostreococcus[seq_27]ATG7                     | 605 MDAFGKPHYLEELTGLSAMMAAAAEVIAWDDDD     | 638   |
| Chlorophyta_Micrononas[seq_26]ATG7                       | 604 ISVFDDPKLLEDAITGLTELLAVDADDAEVLDDDDF  | 640   |
| Chlorophyta_Lobosphaera[seq_23]ATG7                      | 611 LAAFAADTLEEDKLGITKVMHDAADA--VEV       | 646   |
| Chlorophyta_Lobosphaera[seq_22]ATG7                      | -----                                     | ----- |
| Chlorophyta_Lobosphaera[seq_21]ATG7                      | 58 LEALODKKKLEDLTGUTALHSETAAMFDG          | 95    |
| Chlorophyta_Lobosphaera[seq_24]ATG7                      | -----                                     | ----- |
| Chlorophyta_Lobosphaera[seq_20]ATG7                      | -----                                     | ----- |
| Chlorophyta_Chlamydomonas[XP_001703365.1]ATG7            | -----                                     | ----- |
| Chlorophyta_Chlamydomonas[PNW84948.1]ATG7                | 611 AEALASPARLALTGLEELHAAAADEESEEE        | 648   |
| Chlorophyta_Arabidopsis[seq_19]ATG7                      | 610 LEAINHRTYLEDLTGLTELLKKAANSFNLWD       | 647   |
| Chlorophyta_Crysa[XP_01615773.1]ATG7                     | 607 MWLINERTYLEDLTGLTLKSAASVQVEWIDEVDD    | 644   |
| Chlorophyta_Marchantia[seq_25]ATG7                       | 609 LEVLNRPNYLEDLTGLTEMLAATCGLTLDWDEDD    | 645   |
| Chlorophyta_Marchantia[OE31696.1]ATG7                    | 544 LEVLNRPNYLEDLTGLTEMLAATCGLTLDWDEDD    | 580   |
| Ancoracysta_Ancoracysta[seq_3]ATG7                       | 600 AQVFSNPNYLEDITGLSQLOQACDQVWVDDDD      | 637   |
| Hemimastigophora_Spironema[seq_50]ATG7                   | 592 LQVLKNPAMLDEITGLTSMKKATETMTLDWDE      | 629   |
| Ancyromonadida_Nutomonas[seq_4]ATG7                      | 605 LQVMNSPTVLEDMTGLTAMNKEAEELDFONDDDD    | 642   |
| Malawimonadida_Malawimonas[seq_65]ATG7                   | 604 MDVLRTPKLLEDISGVTEMTTDADERGEMIVL      | 641   |
| Metamonada_Tritrichomonas[OH9S9604.1]ATG7                | 562 MRAVNEPNFLEDSVSGITEMKATMVDEDC         | 595   |
| Metamonada_Metamonas[DS113646-3-36765-38645]ATG7         | 563 LRAITVEGLSEVSGINAKMAEMADVDC           | 599   |
| Metamonada_Monocercomonoides[seq_66]ATG7                 | 606 LQAFNDPEVLERLVGSGMNDNDVDDDEDSV        | 643   |
| Discoba_Rhynchopus[seq_34]ATG7                           | 602 EKVLNDRSLELTERAGIDAMLKVADDLDM         | 639   |
| Discoba_Diplonema[seq_31]ATG7                            | 592 LEVLNDRPTOLSKIISGLHAFLEKVKEDFAL       | 629   |
| Discoba_Trypanosoma[Tb927_10_v5.1-6-2739506-2737149]ATG7 | 601 LRCINDPMYIEEVSGVKAFKESCALSDCD         | 638   |
| Discoba_Euglenia[seq_32]ATG7                             | 605 ETVLNNRVELEDMTGLKQVKKEVDAEEEA         | 642   |
| Discoba_Naegleria[seq_33]ATG7                            | 529 ERCFNDSKYLEELTGLKQHQETLKDYSE          | 566   |
| Discoba_Percolomonas[AOAGU1FMM3]ATG7                     | 591 YOALLHPEALEELTGLSTLKKQ-----DEK        | 625   |
| Discoba_Andaliucia[seq_30]ATG7                           | 588 RNVGNDRSILEELISGLQDVDDGSEILEMT        | 625   |
| Breviata_Pygusial[seq_6]ATG7                             | -----                                     | ----- |
| Breviata_Pygusial[seq_5]ATG7                             | 93 ETVGNDRTHLE-----                       | 103   |
| Breviata_Pygusial[seq_8]ATG7                             | -----                                     | ----- |
| Breviata_Pygusial[seq_7]ATG7                             | -----                                     | ----- |
| Fungi_Saccharomyces[EDZ71648.1]ATG7                      | 578 KKALEHRLYLEEISGLSVTKQEVERLNDV         | 615   |
| Fungi_Komagataella[seq_42]ATG7                           | 593 KDALNENNYLEDLTGLTKVQKESEIQEFN         | 630   |
| Fungi_Schizosaccharomyces[seq_44]ATG7                    | 596 LRAINEPDVVEELGSLREVOALGEITMEV         | 633   |
| Fungi_Claridoeglomus[seq_37]ATG7                         | -----                                     | ----- |
| Fungi_Claridoeglomus[seq_38]ATG7                         | 280 KRVFDSRTLEELTGLSKLHOSEVDFW            | 316   |
| Fungi_Gigasporia[seq_40]ATG7                             | 609 NRVFDSRACLLEDLTGLSKLHOSEVDFW          | 645   |
| Fungi_Catenaria[seq_36]ATG7                              | 592 REVGNAPGVLEKMTGLDENKRAEEALK           | 629   |
| Fungi_Catenaria[ORZ40662.1]ATG7                          | 578 REVGNAPGVLEKMTGLDENKRAEEALK           | 645   |
| Fungi_Piromyces[seq_43]ATG7                              | 606 QKIVSTPDVLEQLTGLDNLHKEGLLNCV          | 643   |
| Fungi_Gonapodyales[seq_41]ATG7                           | 598 ERVLNDRPSYLERVSGLOAMKDKLES            | 635   |
| Fungi_Batrachochytrium[seq_35]ATG7                       | 607 LKGLASPEVLEEVSGLKDLKHEH--VD           | 642   |
| Fungi_Batrachochytrium[OAJ39464.1]ATG7                   | 511 LKGLASPEVLEEVSGLKDLKHEH--VD           | 546   |
| Fungi_Forticula[seq_39]ATG7                              | 608 QRVLREBILLEDLTGISEIKNAADND            | 642   |
| Metazoa_Homo[Q93532]ATG7                                 | 611 AKVFNSSSFLEDLTGLTLHQETQA--AE          | 647   |
| Metazoa_Xenopus[KA8612791.1]ATG7                         | 611 AKAFNSSSFLEDLTGLTLHQETQA--AE          | 647   |
| Metazoa_Danio[AOAG2KPR3]ATG7                             | 604 AKVFNSSSFLEDLTGLTLHQETQAAE            | 639   |
| Metazoa_Drosophila[seq_70]ATG7                           | 603 FKIFETAKFLEDLTGISEFKRLNSEI            | 640   |
| Metazoa_Daphnia[EPX82614.1]ATG7                          | 608 AEVFNDSVLEQVSGUADLHKDIATIED           | 644   |
| Metazoa_Caenorhabditis[seq_67]ATG7                       | 595 RDVMNSPGRLEEVTLGDELQNSVNAI            | 630   |
| Metazoa_Dicymela[seq_69]ATG7                             | 601 LSCQNDSTFIRSLVKLGEDHSNVDFLED          | 637   |
| Metazoa_Corticium[seq_68]ATG7                            | 507 LQVFNSTPFLFEEVTGSLQHAAEAVE--          | 542   |
| Holozoa_Helgocaul[seq_58]ATG7                            | 523 IGAGNIPNVLEDLSGLALHDVADE--LE          | 558   |
| Holozoa_Stephanocaul[seq_64]ATG7                         | 377 TVNGNTSTFLEDLTGLSAMQAAVED             | 414   |
| Holozoa_Salpingocaul[seq_62]ATG7                         | 596 ----P-----                            | 597   |
| Holozoa_Capsaspora[KJ92398.1]ATG7                        | 608 QKAFNSRTFLEELTGKKLHEETEAALAD          | 645   |
| Holozoa_Ichthyophonus[seq_59]ATG7                        | -----                                     | ----- |
| Holozoa_Ichthyophonus[seq_60]ATG7                        | 69 LKALNS-----                            | 75    |
| Holozoa_Ichthyophonus[seq_61]ATG7                        | -----                                     | ----- |
| Holozoa_Creolimax[seq_54]ATG7                            | -----                                     | ----- |
| Holozoa_Creolimax[seq_56]ATG7                            | 76 -----RDAFDK-----                       | 82    |
| Holozoa_Creolimax[seq_57]ATG7                            | -----                                     | ----- |
| Holozoa_Creolimax[seq_52]ATG7                            | -----                                     | ----- |
| Holozoa_Creolimax[seq_55]ATG7                            | 79 LCA-----                               | 81    |
| Holozoa_Creolimax[seq_53]ATG7                            | -----                                     | ----- |
| Holozoa_Sphaerothecum[seq_63]ATG7                        | 611 FKVFNLPSYLEDITGLSELHRETDELS           | 648   |
| Holozoa_Coralochytrium[seq_51]ATG7                       | 591 IEVLADSSYLELSGISTLHASA--ADL           | 626   |
| Amoebozoa_Entamoeba[DS571196-6-71419-69677]ATG7          | 546 LDAINDPKILNIVGIDQVE-----ND            | 578   |
| Amoebozoa_Dictyostelium[seq_1]ATG7                       | 611 INWMDSSCLTKICGIDDLKNTENVID            | 648   |
| Amoebozoa_Vermamoeba[seq_2]ATG7                          | 400 MEAFNSPKLEDLTGITKMKESANLDV            | 437   |
| Amoebozoa_Acanthamoeba[XP_004349643.1]ATG7               | 558 QYVGNNTHTLEDITGLTLQKATVDFS            | 595   |
| CRuMs_Mantamonas[seq_10]ATG7                             | -----                                     | ----- |
| CRuMs_Mantamonas[seq_11]ATG7                             | 44 KEAFNNPDVLEVSGLTAMKAMEDMD              | 80    |
| CRuMs_Mantamonas[seq_9]ATG7                              | -----                                     | ----- |
| CRuMs_Rigifilia[seq_12]ATG7                              | 603 MRVLSNPSHLEDVTGLTALKESMEVE            | 640   |



65 LKRY IVNVEYVYVPLVYMDAYRQGVMDVADLTGRGKAWFLTGLEPGLGRPLCALHPORIALIMAPIMOTSAFSSSSSSSSSSSSSSSSSSSSSSSSSSKARSAPSK  
66 LRKGLSVYVAKFPLVYFHYIMDXYKQKATLEIKELGASAKLEIIDLIVPLGFSYFVIOQRNVEKTEYF-FSPITSLMILKLFENLYLKE  
65 LLEFHIVYHTIYVQVPLVYFRVQAVDGTVNSNIVYRDLQSGNRFTVAMEEVLPGKPFSLHPCEIATAMQLLAQLQARSTEVQPLVSWLSVQPLVLESLDYB--  
65 LLEFHIVYHTIYVQVPLVYFRVQAVDGTVNSNIVYRDLQSGNRFTVAMEEVLPGKPFSLHPCEIATAMQLLAQLQARSTEVQPLVSWLSVQPLVLESLDYB--  
65 LLEFHIVYHTIYVQVPLVYFRASAVDGRPLVLEHIVASNDMSIAMEEVLPGKPFSLHPCEIATAMQLLAQLQARSTEVQPLVSWLSVQPLVLESLDYB--  
110EWFHVLFTVYSGPELRRLRADWAGAPLSLAEVRRGL--DFDGVSVREAVYGEAFVLVGCACAEKVDAL--AARCCALDGFALPLHLAAGACALISLPGQPIVDA  
77 VAEHLVHVLQOVNFVPMVFNLYODDQVMRGCLLERTMTASSWANLTGAEHIVPLGFFLHPCEIOMFNTLIVYHNSNTRTBLFLNFMILSOVNTPTPTPKPKN  
92 LLEHLVHNESFQPOLLVTA--TENRYSLELWDOCFKLLEHSLTETMIPR--MGCFHPORIAEWMSVLAKHT-ADTELSTLIVMAAFVSSFLPISKESVWLYPOH  
116 LLEHLVHNESFQPOLLVTA--TENRYSLELWDOCFKLLEHSLTETMIPR--MGCFHPORIAEWMSVLAKHT-ADTELSTLIVMAAFVSSFLPISKESVWLYPOH  
92 LLEHLVHNESFQPOLLVTA--TENRYSLELWDOCFKLLEHSLTETMIPR--MGCFHPORIAEWMSVLAKHT-ADTELSTLIVMAAFVSSFLPISKESVWLYPOH  
82 LLEHLVYNGVRLQVOLLCA--TQOYMSHTOLWEKLSLSSGFSSFMIPILHVFFLHPGOSAEWISML-LAKHTDHNTRFSS--ALLVWAVVTVLPLRLBSAQISOLQ  
94 QFELNVYNTAHMQLLHAINENKYLKSHKEWCELEKPEMTLITLFEHPLLR--VFLGHPOSSEWNNILMSVKNINNNND--YLLTWYFVLSLHPLEKFO-QIELEN  
86 QFELNVYNTAHMQLLHAINENKYLKSHKEWCELEKPEMTLITLFEHPLLR--VFLGHPOSSEWNNILMSVKNINNNNDYLLTWYFVLSLHPLEKFO-QIELEN  
21-----HAH-----SAADFVYTGAEHVLGVPCLMALHPCLASHLMRAMADGAE-----VLDYLVAMGVHAPLVGVADHGLMLVVGQ  
100 RVEHLVYEDTVGPMMLFNAYAPGSSPKK-----  
81 LRLHICRGATVQVQLLLGLSGDGRVDVDEARAYLOOPLDOMLTPAEHPLGFLPCVALHACHAELLSLMDSDAASREGQRPDLGAWSLVAPLELRQVNTVT--  
90 RLEHLVYGATVQVQLLLGLSGAGELWTVSRSHMAIAADSVQVLEHAPLGVFFALHPORAEWMAJLORRESADGQPLVSLASVLAQVADARAMLSSA--  
68 RVHVIYVLOVTCOPLVLLLRHOGDGLSALDEIWAHLSADHMAFVFTVEVPLGTGFCFALHPORINELMALMSRARSAPSGGSLVSWMSVITIV-RLV-IRPTVH--  
81 MRVHYVVEAFCOPLVFLKGLIBGRLLDLEYIWRHDSQSGWCLPTTEHPVGEFFHFVHPORKOFMDAIOAFLEPCTOSNFKWLSVQVIAV-GRLLPLHSGN-  
113 VHYVVEAFCOPLVFLRGGTAAGA--SLPEAWAKQASRSALAEITDDEHGEFFLGLHPORREFMDMMAMRKQDQKDFEACWLVSFGVQV-GRVPLALFQASG-  
72 VGHVIAYSAAVPLLLFRGQDQKPLKLEIWAHLSAKWSLSQCEHPVGFVFLAVHPORAEWLSQVLTSTVSTQKDFEACWLVSFGVQV-GRVPLALFQASG-  
83 VREHYVYSAFVPCVLCVARDATTAAMTVSRLSTLRNDNDVLYPSNHPRGQWACVPAAGARML-LAADAATS--KLEAWLRQVAREVSD--  
93 VLYHIVYSSSFGVCLMLFRAHHOGSGMAEAVDAPLSTSRWTFITLHEHPLH--PAPORIALMELMLRSGSVGLVAVVAVVAPVRLP-SPJIA--  
105 LLDVHCYSASVQVPMHFRYSGDGLPLADVAVALFPEQLGVFLGCEHPLGFWALHPCEIADWALVAGAMAGSSGAGEGQVRAWLAVHGVHVLGRAG-  
97 YDHYHCYSASVQVPLVFRSCTSGEPLADVAKKVPLESKWTFITGEEHPLNRPWFKLHPCEIGVAILKQSSSSSSSSGQVLYVSSVVGQV-GR--PLEMLN-  
90 YDHYHVVSFSYKVPVLFQCGHAGSGLLTDEIKEDIPESKWTFITREEHPFSRWFVTLHPGOSDOCKMLLEVE-NKDQHVQVPAWLSVVGQV-GLKIPLELYMOSS-  
88 YDHYHVVSFSYKVPVLFQCGHAGSGLLTDEIKEDIPESKWTFITREEHPFSRWFVTLHPGOSDOCKMLLEVE-NKDQHVQVPAWLSVVGQV-GLKIPLELYASG-  
70 YDHYHVVSFSYKVPVLFQCGHSGGLLTDEIKEDIPESRWTFITREEHPFSRWFVTLHPGOSDOCKMLLEMOQKQDQ--VLPWALTIVVGQV-GLKIPGLGHGNS-  
92 YDHYHVVSFSYKVPVLFQCGHSGGLLTDEIKEDIPESRWTFITREEHPFSRWFVTLHPGOSDOCKMLLEMOQKQDQ--VLPWALTIVVGQV-GLKIPGLGHGNS-  
80 RCTHIVHVSFNVPLVFRHSHSGSPLNWLDAVLDPONRVTFGLTEHPLRWFMLHPGOSLSMSLMLTRIKKQSRGQDQWLLVLSVGAACVRLVPLDGLFSLKN-  
72 DDLHIVHVSFNVPLVFRV--ARAFAGMLTEHPVLTACAMLHPCEIOTMIMHALKSSDN--YLVMLVGAACVLA-EISIDAEALLAAR  
68 RSHVHLSAAFAAPMLFSFARDGLHCLHADAISPLTQVMDLPLHLOEENIATMOTL--QHTTBEVYQWTVNLVPMPSID--IAEFSRR  
8 FANYIYSDOVFTVPLSATFENRCHOLTESELSIAPLEKLDGVSREHDLQKPVFFIHPOQEEFY--DPLKIAS--VILWNLVRVLP--FR-RLP-  
43 FVTIYIDVEVQOAPVLSAYTESGHRITDELKIMEKLDMSVSRHITGILPFLFIHPKIEITVL--EHH--GIDEMNFWGLPFL--RLPI-  
60 VLNHIVYFDVSVYVYFRATHESEFVNLQLSHT--SDKNITOGIHPYRPFYMHPOQINIL-KLGOTLQSEKMDSDLLFWISLFLRLVDVPLIQCKF  
8--DLEVOQHIVYRPLAFASAYTAKGTVYSARIFDLIRNHPSSVLSAASHVITA--CNVHPGEANLKV--NATDTPAYDALISFAGAILVQSSQOLRAECA--  
80 KADINLEVOQHIVYRPLAFASAYTAKGTVIRADKLLSNPCNDQDVALSAGLITY--LILNHPGEANLKV--NVS-ASSG--IYTSFSLHGNFIQVSEMOCPVPPR  
107 SEFHVHVVSFVSFVPLVFLWYSEDGRSLSLDLYSGVSGTRGAFITGLEHILEKPFYCIHPORIAELLRTWATGPNQKQSGSLLEWISLWGLV-GLHDTMAAAGS  
80 SIRHYVNIQIFKCPILVFNLYNNNNLLTQMLEIFONFNRTGAFITGLEHILEKPFYCIHPORIAELLRTWATGPNQKQSGSLLEWISLWGLV-GLHDTMAAAGS  
66 FLSHLILVQDVLHPLVFFFRFAGSGCOLLEIRDLKSSISSRPLKFSQPLVSSQPFFFLHPORQDVLSHL--SLSSFLVLSWFLS-  
68 FLLHVLVQDVLHPLVFFFRFAGSGCOLLEIRDLKSSISSRPLKFSQPLVSSQPFFFLHPORQDVLSHL--SLSSFLVLSWFLS-  
77 HILVLYKSVNPLLLRLWIEIDIMTK-LMLDLEL-TILNLE--BSWYSFHPDSCIV-DOAE--FASTLRWVSF-IFS-WLYDEY-  
85 TMHVARDSFSEVPOFFQVANGSDPILKTEQILEQNLAYDALIGOCR--GTWAVIHPORRDEMELE--QIKEDKILSLWLYIHOVLSPLIIRKAVDA  
97 TVDHYIYASVQVPLVFNAYRKGTGHPNLEVSLVLDLIGKGSISQDHPILIPFYHHPCEIATLKSIVDKSGSSNNNNNIRASWLSVGVV-GLK-VGSYFL-  
95 PMWHIYASVQVPLVFNAYRKGTGHPNLEVSLVLDLIGKGSISQDHPILIPFYHHPCEIATLKSIVDKSGSSNNNNNIRASWLSVGVV-GLK-VGSYFL-  
74 WHEHVIYFHVQVPLVFRASDGLPLPPEVIAHLGQDYTNLSLSQDHPFLGTFWFVHPCTALRKLKSGQSKNVSSSSASFLSVGVV-GLK-VGLEFGM-  
90 ECKDFVLYASVQVPLVFSIVDDTGMVLSLSEIVMLQDSHRFATISMODVSYPOVILHPCNHAKSEQHSDAT--FLOYLLHINNRLLSINIDIEIVQOEK  
117 WYHVLVQVQVPLVFRASDGLGRPLTLK--IGWYSASPILSVTHVYLRPPFMVHPORCROMADLDDATA--GPEYMSAFLVAAGAAGLGOALATLHSLAG-  
89 KYEHVLYCSYQVPLVFRASDGLGRPLTLK--IGWYHVGQMDVITQGEHPLGPPFFLHPCEINEFMTLVKNSQKINKN--NEFMSLVGVV-GLNYAKALSDER  
97 HYEHLVLYCSYQVPLVFRASDGLGRPLTLK--IGWYHVGQMDVITQGEHPLGPPFFLHPCEINEFMTLVKNSQKINKN--NEFMSLVGVV-GLNYAKALSDER  
98 HYEHLVLYCSYQVPLVFRASDGLGRPLTLK--IGWYHVGQMDVITQGEHPLGPPFFLHPCEINEFMTLVKNSQKINKN--NEFMSLVGVV-GLNYAKALSDER  
97 HYEHLVLYCSYQVPLVFRASDGLGRPLTLK--IGWYHVGQMDVITQGEHPLGPPFFLHPCEINEFMTLVKNSQKINKN--NEFMSLVGVV-GLNYAKALSDER  
47 TDETLNLSNIVYPIIFWNFENFSSPLFTVDIRNISEARSRSHYEPFMGLVLYNHPONSNINKELE-----NTRDS--MLMSVYVGOOL-GLK--DORVL-  
39 FKVEIYNSVYPIIFWNFENFSSPLFTVDIRNISEARSRSHYEPFMGLVLYNHPONSNINKELE-----NTRDS--MLMSVYVGOOL-GLK--DORVL-  
38 TCDHYIYSSVSEVPIIFWNFENFSSPLFTVDIRNISEARSRSHYEPFMGLVLYNHPONSNINKELE-----NTRDS--MLMSVYVGOOL-GLK--DORVL-  
106 VHYVYVQAVPLVFSVLELDTGPISEGAWRHLPQCREQATVYSDADPALORPFYFHPORIAEML--AATVADTPAEALNVSLITREV-GLNVPLAEOLP-  
96 QFHYIAYNNAYAPVLFYFVLELDTGPISEGAWRHLPQCREQATVYSDADPALORPFYFHPORIAEML--AATVADTPAEALNVSLITREV-GLNVPLAEOLP-  
85 SIPLHWDVATGAPCLMFOAKFTQDQVITSDLPGLTQADVAHEGLSKDHLPGPPFFHHPORIANLDENVRSQDQSGASVDLEFLSVGVSIGIR--VHLHVR-  
107 VHYVYVQAVPLVFNENATLEKRSQDQVNDMHQVSRSSFLGAEHVLGKPPFFHHPORIANLDENVRSQDQSGASVDLEFLSVGVSIGIR--VHLHVR-  
-----LDQWQVIL--BSRL-----INDVR--SVITQIDHPDQVYFQVHPORIANLRAIDTAN-----ETNPLIIVISLVGLVGLTYLMTNDCI-  
90 EAEHIVYSTRVPLVITGRMRGRLRLRLSILNSLTALTGVEEPLGLIFMLVHPORIEELMTLVNSCVRSESKQNVITWALVAPFV-GLYTNIMKET-  
101 EAEHIVYSTRVPLVITGRMRGRLRLRLSILNSLTALTGVEEPLGLIFMLVHPORIEELMTLVNSCVRSESKQNVITWALVAPFV-GLYTNIMKET-  
90 EAEHIVYSTRVPLVITGRMRGRLRLRLSILNSLTALTGVEEPLGLIFMLVHPORIEELMTLVNSCVRSESKQNVITWALVAPFV-GLYTNIMKET-  
91 EODDILYKSVQVPLNLSGSSFFSDPSLNMNWNPLDOSTIBYITVEHPLGNCPCOLHPORIQNLMOQ-KTMH-GENDKRPLVHLVSLFAPLA-GLKPLFKMKN-  
66 VYVYVYVYSTRVPLVYFOASHLDRMLTEWADVPEMDRWNVITQGEHPLGVPCHYIHPCEIKALMTSLTADASTSSN

[illegible]



|                                                           |                                                           |     |
|-----------------------------------------------------------|-----------------------------------------------------------|-----|
| Rhizaria_Ammonia seq_205 ATG12                            | 115 - G K E L - V L H Y S L V P A W A - - - - -           | 129 |
| Rhizaria_Globobulimina seq_217 ATG12                      | 104 - G E L I L V - - Y S L V P A W A - - - - -           | 117 |
| Rhizaria_Eucyrtidium seq_210 ATG12                        | 97 - G E L I C V - - Y S T V L A W G - - - - -            | 110 |
| Rhizaria_Bigelowiella seq_208 ATG12                       | 98 - N N E L - E V S Y C T I N O W G - - - - -            | 112 |
| Rhizaria_Paulinella seq_222 ATG12                         | 116 - N G E L - V V N Y C L V E A W G - - - - -           | 130 |
| Alveolata_Toxoplasma ESS29570.1 ATG12                     | 293 - G G S L - M V S Y C Y T P A Y - - - - -             | 306 |
| Alveolata_Plasmodium ETW54366.1 ATG12                     | 71 - S G S L - N I S Y S F T P A Y - - - - -              | 84  |
| Alveolata_Plasmodium EUR62061.1 ATG12                     | 98 - S G S L - N I S Y S F T P A Y - - - - -              | 111 |
| Alveolata_Vitrella A0A6U4JFV6 ATG12                       | 101 - G E Q L - N I G S L I P A F H - - - - -             | 115 |
| Alveolata_Chromera A0A0G4GWD9 ATG12                       | 108 - E B M A - V O Y G S D N R L S V Q Y N I V S L R S   | 131 |
| Alveolata_Oxyrrhis A0A6V4NV07 ATG12                       | 108 - G Q Q L - A I T T S L E P A F A - - - - -           | 122 |
| Alveolata_Oxyrrhis A0A6V4J2U9 ATG12                       | 106 - Q G E L - I L N Y S I V G A W G - - - - -           | 120 |
| Alveolata_Karenia A0A6T5NH78 ATG12                        | 113 - G N Q L - Q I S Y S E A A F S - - - - -             | 127 |
| Stramenopiles_Phytophthora seq_234 ATG12                  | 101 - G D - V L - V L N Y S L T O A W G - - - - -         | 115 |
| Stramenopiles_Peronosporales seq_231 ATG12                | 93 - G D - V L - V L N Y S L T O A W G - - - - -          | 107 |
| Stramenopiles_Peronosporales seq_232 ATG12                | 88 - D G K L - V V N Y A C S M A W G - - - - -            | 102 |
| Stramenopiles_Aureococcus seq_228 ATG12                   | 122 - G G E L - V V N Y A T I G A Y G - - - - -           | 136 |
| Stramenopiles_Aurantiochytrium seq_224 ATG12              | 75 - N G T L - R I T I G Q A V F G - - - - -              | 89  |
| Telonomia_SRR7371266 seq_241 ATG12                        | 83 - D G R L - H L Y A T N A W G - - - - -                | 97  |
| Centrohelida_Raineriophrys seq_46 ATG12                   | 123 - K G R L - V V N Y C L T P A W G - - - - -           | 137 |
| Centrohelida_Raphidiophrys seq_48 ATG12                   | 114 - E G C L - V V N Y C L I A W G - - - - -             | 128 |
| Centrohelida_Choanocystis seq_41 ATG12                    | 105 - G G S L - S L G Y C E E V A F G - - - - -           | 119 |
| Centrohelida_Choanocystis seq_38 ATG12                    | 98 - D G C L - V V N Y C P T E A W G - - - - -            | 112 |
| Centrohelida_Acanthocystis seq_36 ATG12                   | 116 - D K C L - V I N Y C L T A A W G - - - - -           | 130 |
| Haptophyta_Calcidiscus seq_121 ATG12                      | 106 - D G V L - I L N Y C T T P A W G - - - - -           | 120 |
| Haptophyta_Isochrysis A0A6T1JSG5 ATG12                    | 87 - - A L S L W C L S S C P T T O P P H L S              | 106 |
| Haptophyta_Isochrysis A0A6T0XET5 ATG12                    | 106 - G S A L - V L H Y C T T P A W G - - - - -           | 120 |
| Haptophyta_Emiliana seq_242 ATG12                         | 89 - G S T L - V L H Y C T T E A W G - - - - -            | 103 |
| Haptophyta_Emiliana seq_123 ATG12                         | 89 - H S - - - H T A R F R K R E H T R T I R R A B T - -  | 109 |
| Haptophyta_Prymnesium A0A6S9YC33 ATG12                    | 110 - D G V L - I L N Y C O T P A W G - - - - -           | 124 |
| Haptophyta_Prymnesium A0A6S9YNG5 ATG12                    | 108 - S S T A - - S S W T R - - G W A T S E S A S T S - - | 127 |
| Haptophyta_Pavlova seq_127 ATG12                          | 63 - D G V L - S L H Y C T T P A W G - - - - -            | 77  |
| Haptophyta_Pavlova seq_129 ATG12                          | 82 - D G V L - S L H Y C T T P A W G - - - - -            | 96  |
| Cryptista_Guillardia A0A6U6D6A0 ATG12                     | 116 - N G K L - V I D Y A L K E A W G - - - - -           | 130 |
| Cryptista_Rhodomonas seq_73 ATG12                         | 109 - D G K L - Q I D Y A L M E A W G - - - - -           | 123 |
| Cryptista_Goniomonas seq_67 ATG12                         | 98 - K G C L - V V N N A L E A W G - - - - -              | 112 |
| Cryptista_Palpatomonas seq_71 ATG12                       | 78 - G S K L - S F N S L T P A W G - - - - -              | 92  |
| Glaucophyta_Gloeocharaete seq_117 ATG12                   | 83 - D G V L - V L N Y A T T V A W G - - - - -            | 97  |
| Chlorophyta_Ostreococcus OUS48613.1 ATG12                 | 275 - E G G K - V V F Y S T T P A W G - - - - -           | 290 |
| Chlorophyta_Micromonas seq_60 ATG12                       | 107 - E G K L - V V Y Y A T T P A W G - - - - -           | 121 |
| Chlorophyta_Lobosphaerales seq_54 ATG12                   | 77 - D G R L - L V N Y A C T P A W G - - - - -            | 91  |
| Chlorophyta_Chlamydomonas seq_52 ATG12                    | 77 - E G K L - H V S Y A L T P A W G - - - - -            | 91  |
| Chlorophyta_Arabidopsis NP_001326256.1 ATG12              | 60 - - - Y L - - L C L S L V - - - - -                    | 67  |
| Chlorophyta_Arabidopsis seq_50 ATG12                      | 82 - D B K L - V V N Y A C S M A W G - - - - -            | 96  |
| Chlorophyta_Oryza EA036194.1 ATG12                        | 101 - D G C L - V V N Y A S S M A W G - - - - -           | 115 |
| Chlorophyta_Oryza EAZ00079.1 ATG12                        | 89 - D G Q L - V V N Y A S S M A W G - - - - -            | 103 |
| Chlorophyta_Marchantia seq_56 ATG12                       | 89 - D G K L - V V N Y A C S M A W G - - - - -            | 103 |
| Ancoracysta_Ancoracysta seq_22 ATG12                      | 125 - D G K L - I V N Y C S T P A W G - - - - -           | 139 |
| Ancyromonadida_Nutomonas seq_26 ATG12                     | 109 - - - G K M L M I N Y A T Q E - - - - -               | 120 |
| Malawimonadida_Malawimonadida seq_163 ATG12               | 96 - G G L L - N I S Y C T T A A W G - - - - -            | 110 |
| Metamonada_Tritrichomonas seq_173 ATG12                   | 74 - V E - E I - D I N Y S I S P O F G - - - - -          | 88  |
| Metamonada_Trichomonas DS113793-6-20469-20053 ATG12       | 76 - Q T T L - D I Y Y S S G O V F G - - - - -            | 90  |
| Discoba_Rhynchopus seq_91 ATG12                           | 77 - S K K L - T V F Y S L K O A W G - - - - -            | 91  |
| Discoba_Diplonemoides seq_78 ATG12                        | 108 - N T K L - S I T A F K E I A W G - - - - -           | 122 |
| Discoba_Trypanosoma Tb927_11_v5.1-1-3040801-3041157 ATG12 | 96 - S S D Q R - H L S F A S L I F H G - - - - -          | 112 |
| Discoba_Euglenas seq_83 ATG12                             | 102 - Q B T L - V V N Y S R O A W G - - - - -             | 116 |
| Discoba_Neodieria seq_85 ATG12                            | 114 - N G M L - V I N Y S L K I A W G - - - - -           | 128 |
| Discoba_Percolomonas seq_89 ATG12                         | 110 - D K K L - C I Y N D I S P C F G - - - - -           | 124 |
| Discoba_Percolomonas A0A6UOKS69 ATG12                     | 96 - E S H L - I V S Y C T Q S W A W G - - - - -          | 110 |
| Discoba_Percolomonas A0A6UOKD5 ATG12                      | 83 - E S H L - I V S Y C T Q S W A W G - - - - -          | 97  |
| Discoba_Andalucia seq_77 ATG12                            | 109 - D B K L - V V H Y C L T P A W G - - - - -           | 123 |
| Breviata_Pygsuia seq_28 ATG12                             | 85 - D G C L - I V N Y C L T O A W G - - - - -            | 99  |
| Fungi_Saccharomyces seq_114 ATG12                         | 108 - N D - E L - I V S Y C A S V A F G - - - - -         | 122 |
| Fungi_Komagataella seq_107 ATG12                          | 108 - N G E L - V V S Y S R V A F S - - - - -             | 122 |
| Fungi_Schizosaccharomyces seq_116 ATG12                   | 118 - D S H L - L I N Y C I N V A F G - - - - -           | 132 |
| Fungi_Claroideoglomus seq_98 ATG12                        | 114 - D G H L - I I N Y C T S A A W G - - - - -           | 128 |
| Fungi_Gigasporales seq_103 ATG12                          | 120 - D G H L - I I N Y C T S A A W G - - - - -           | 134 |
| Fungi_Gigasporales RIB01942.1 ATG12                       | 70 - D G H L - I I N Y C T S A A W G - - - - -            | 84  |
| Fungi_Catenaria seq_96 ATG12                              | 79 - T D G H L - V V S Y S M T P A W S - - - - -          | 94  |
| Fungi_Piromyces seq_109 ATG12                             | 72 - G G E L - Q V N Y A N M P A Y G - - - - -            | 86  |
| Fungi_Gonapodytes seq_104 ATG12                           | 79 - H G - - - A V A D N G - - - - -                      | 87  |
| Fungi_Gonapodytes seq_105 ATG12                           | 92 - A G D L - V I N Y A T T A A W G - - - - -            | 106 |
| Fungi_Batrachochytrium seq_92 ATG12                       | 108 - D G K L - I V N Y S I T P A W G - - - - -           | 122 |
| Metazoa_Homo O94817 ATG12                                 | 116 - D G K L - V L H Y C K S O A W G - - - - -           | 130 |
| Metazoa_Xenopus seq_201 ATG12                             | 114 - D G K L - V L H Y C K S O A W G - - - - -           | 128 |
| Metazoa_Danio seq_186 ATG12                               | 105 - D G K L - V L H Y C K S O A W G - - - - -           | 119 |
| Metazoa_Drosophila seq_198 ATG12                          | 97 - N G K L - V L Y Y C K N O A W G - - - - -            | 111 |
| Metazoa_Daphnia EFX89332.1 ATG12                          | 111 - D G K L - I L A Y C R T O A W G - - - - -           | 125 |
| Metazoa_Caenorhabditis seq_175 ATG12                      | 99 - D K E I L - E L O V S I T P A Y G - - - - -          | 114 |
| Metazoa_Dicymela seq_194 ATG12                            | 87 - G B T L - F L S Y C K K V A W G - - - - -            | 101 |
| Metazoa_Corticium seq_182 ATG12                           | 90 - D G K L - V F H Y C K S O A W G - - - - -            | 104 |
| Holozoa_Helgocaela seq_148 ATG12                          | 99 - E G I L - E L T Y T V I P S A W G - - - - -          | 113 |
| Holozoa_Stephanocaela seq_158 ATG12                       | 108 - K - A L I L D V T Y G I N E A W G - - - - -         | 123 |
| Holozoa_Salpingoecia seq_152 ATG12                        | 119 - K G T S L - I L R Y S L T P A Y G - - - - -         | 134 |
| Holozoa_Capsasporales seq_138 ATG12                       | 128 - K G O L - D I O V A T T P A W G - - - - -           | 142 |
| Holozoa_Ichthyophonus seq_150 ATG12                       | 101 - D N A L - D I Y Y C T I E A W G - - - - -           | 115 |
| Holozoa_Creolimax seq_142 ATG12                           | 98 - D S K L - D I Y Y C T T P A W G - - - - -            | 112 |
| Holozoa_Sphaerodiscum seq_154 ATG12                       | 115 - D B K L - D I H Y S T T P A W G - - - - -           | 129 |
| Holozoa_Coralichytrium seq_139 ATG12                      | 84 - S N E L - N I Q V A L V E A Y G - - - - -            | 99  |
| Amoebozoa_Entamoeba XP_653661.2 ATG12                     | 104 - Q B E I - E L T F S R D N V F G - - - - -           | 118 |
| Amoebozoa_Dictyostelium seq_17 ATG12                      | 103 - N D - Q L - I I N Y S L O M A W G - - - - -         | 117 |
| Amoebozoa_Vermamoeba seq_21 ATG12                         | 109 - N G K L - V I N Y A N T A A W G - - - - -           | 123 |
| Amoebozoa_Acanthamoeba seq_15 ATG12                       | 105 - S G O L - V I N Y C T T A A W G - - - - -           | 119 |
| CRuMs_Mantamonas seq_30 ATG12                             | 112 - N N K L - A I S Y C E T V A W G - - - - -           | 126 |
| CRuMs_Rigifilia seq_34 ATG12                              | 143 - N D - I L - I V N Y C I T P A W G - - - - -         | 157 |

[illegible]



Rhizaria\_Amonialesseq\_59/ATG5  
Rhizaria\_Globobulimina)seq\_62/ATG5  
Rhizaria\_Eucyrtidom)seq\_61/ATG5  
Rhizaria\_Bigelowiell)seq\_60/ATG5  
Rhizaria\_Paulinell)seq\_63/ATG5  
Alveolata\_Toxoplasma)AAQM03000026-2-330440-33361/ATG5  
Alveolata\_Plasmodium)ETW28760.1/ATG5  
Alveolata\_Plasmodium)ETW39978.1/ATG5  
Alveolata\_Plasmodium)KOB58748.1/ATG5  
Alveolata\_Plasmodium)KOB58177.1/ATG5  
Alveolata\_Vittellia)A06U4C230/ATG5  
Alveolata\_Chromera)A06U4V62/ATG5  
Alveolata\_Karenia)A06A76A5D3/ATG5  
Alveolata\_Tetrahymena)seq\_0/ATG5  
Stramenopiles\_Phytophthora)seq\_67/ATG5  
Stramenopiles\_Peronosporales)seq\_65/ATG5  
Stramenopiles\_Parvosporales)seq\_66/ATG5  
Stramenopiles\_Aureococcus)A04A6S9GGB0/ATG5  
Stramenopiles\_Aurantiochytrium)seq\_64/ATG5  
Telonemia\_SRR731266)seq\_68/ATG5  
Centrohelida\_Raineriophrys)seq\_10/ATG5  
Centrohelida\_Raineriophrys)seq\_11/ATG5  
Centrohelida\_Raphidiophrys)seq\_12/ATG5  
Centrohelida\_Chanoocyts)seq\_9/ATG5  
Centrohelida\_Acanthocyts)seq\_8/ATG5  
Haptophyta\_Calcidiscus)seq\_37/ATG5  
Haptophyta\_Isochrysis)A06T1HWB5/ATG5  
Haptophyta\_Isochrysis)A06T1JHNB4/ATG5  
Haptophyta\_Emiliana)A046U8L241/ATG5  
Haptophyta\_Pyrnesium)A06GT08TB7/ATG5  
Haptophyta\_Pavlovales)seq\_38/ATG5  
Cryptista\_Guillardia)XP\_00583979.1/ATG5  
Cryptista\_Rhodomonas)A06U4PNF5/ATG5  
Cryptista\_Goniomonas)seq\_18/ATG5  
Cryptista\_Goniomonas)A06T1JQ56/ATG5  
Cryptista\_Palpitomonas)seq\_19/ATG5  
Glaucophyta\_Glaucocystes)A06T1G970/ATG5  
Glaucophyta\_Glaucocystes)seq\_36/ATG5  
Chlorophyta\_Ostreococcus)OUS45109.1/ATG5  
Chlorophyta\_Micromonas)seq\_16/ATG5  
Chlorophyta\_Lobosphaera)seq\_14/ATG5  
Chlorophyta\_Lobosphaera)seq\_15/ATG5  
Chlorophyta\_Chlamydomonas)PNW73408.1/ATG5  
Chlorophyta\_Chlamydomonas)XP\_001692662.1/ATG5  
Chlorophyta\_Arabidopsis)seq\_13/ATG5  
Chlorophyta\_Oryza)seq\_17/ATG5  
Chlorophyta\_Marchantia)P44619.1/ATG5  
Ancoracysta\_Ancoracysta)seq\_4/ATG5  
Hemistaplophora\_Spironema)seq\_39/ATG5  
Ancyromonadida\_Nutomonas)seq\_5/ATG5  
Malawimonadida\_Malawimonas)seq\_47/ATG5  
Metamonada\_Trichomonas)A0077224.1/ATG5  
Metamonada\_Trichomonas)DS113397-4-91101-90688/ATG5  
Metamonada\_Trichomonas)XP\_001292688.1/ATG5  
Metamonada\_Monoceromonoides)seq\_49/ATG5  
Metamonada\_Monoceromonoides)seq\_50/ATG5  
Metamonada\_Monoceromonoides)seq\_48/ATG5  
Metamonada\_Monoceromonoides)seq\_51/ATG5  
Discoba\_Rhynchopus)seq\_25/ATG5  
Discoba\_Diplanema)seq\_22/ATG5  
Discoba\_Diplanema)seq\_21/ATG5  
Discoba\_Trypanosoma)XP\_011774026.1/ATG5  
Discoba\_Euglenoides)seq\_23/ATG5  
Discoba\_Nautilia)XP\_00268039.1/ATG5  
Discoba\_Percolonas)seq\_24/ATG5  
Discoba\_Percolonas)A06U4VJ83/ATG5  
Discoba\_Andaliu)seq\_20/ATG5  
Fungi\_Saccharomyces)seq\_34/ATG5  
Fungi\_Komagataella)seq\_32/ATG5  
Fungi\_Schizosaccharomyces)seq\_35/ATG5  
Fungi\_Gigasporales)seq\_28/ATG5  
Fungi\_Catenariales)seq\_27/ATG5  
Fungi\_Pirromyces)seq\_33/ATG5  
Fungi\_Gonapodyales)seq\_31/ATG5  
Fungi\_Batrachochytrium)seq\_26/ATG5  
Fungi\_Funiculariales)seq\_29/ATG5  
Metazoa\_Homo)O9H1Y0/ATG5  
Metazoa\_Xenopus)seq\_58/ATG5  
Metazoa\_Danio)seq\_54/ATG5  
Metazoa\_Drosophila)seq\_57/ATG5  
Metazoa\_Daphnia)seq\_55/ATG5  
Metazoa\_Caenorhabditis)seq\_52/ATG5  
Metazoa\_Dicorymbes)seq\_56/ATG5  
Metazoa\_Corticium)seq\_53/ATG5  
Holozoa\_Stephanocelis)seq\_43/ATG5  
Holozoa\_Helgomonas)seq\_46/ATG5  
Holozoa\_Salpincgocelis)seq\_44/ATG5  
Holozoa\_Capsaspora)XP\_00434817.1/ATG5  
Holozoa\_Ichthyophonus)seq\_43/ATG5  
Holozoa\_Creolimax)seq\_41/ATG5  
Holozoa\_Serialia)seq\_45/ATG5  
Holozoa\_Corallochytrium)seq\_40/ATG5  
Amoebozoa\_Entamoeba)DS571153-6-30394-29480/ATG5  
Amoebozoa\_Dictyostelium)seq\_3/ATG5  
Amoebozoa\_Vermamoeba)seq\_3/ATG5  
Amoebozoa\_Acanthamoeba)seq\_1/ATG5  
CruRs\_Mantamonas)seq\_6/ATG5  
CruRs\_Rigillia)seq\_7/ATG5

225 GSFNNYLKOCVFLSSNNVAAVSAKSKSDQDTLWSGVKADNLLVFPVYHSIFGKH-----LIRYPPRLILRFNEOVDVPTORPILDCGGRRLRECLQOIIPGVLCQOQSEIGITVOGVRVALNIP 243  
226 TFFNNYLKOCVFLSSNNVAAVSAKSKSDQDTLWSGVKADNLLVFPVYHSIFGKH-----LIRYPPRLILRFNEOVDVPTORPILDCGGRRLRECLQOIIPGVLCQOQSEIGITVOGVRVALNIP 246  
80 QNFMFLKOCVFLSSNNVAAVSAKSKSDQDTLWSGVKADNLLVFPVYHSIFGKH-----LIRYPPRLILRFNEOVDVPTORPILDCGGRRLRECLQOIIPGVLCQOQSEIGITVOGVRVALNIP 172  
119 EFFFHSLKOCVFLSSNNVAAVSAKSKSDQDTLWSGVKADNLLVFPVYHSIFGKH-----LIRYPPRLILRFNEOVDVPTORPILDCGGRRLRECLQOIIPGVLCQOQSEIGITVOGVRVALNIP 235  
125 SFFNNALKEFLVYASSOAVMGVSQSDFSALWDSIASDPRDFSGARSKIMSVSVAASGCEPLRVLLVSPGLIIOQPTPLRLTDDSKPOIIRTLFESMLPGVOKPEVEVLVCGIKPPLITP 247  
226 SFFNNALKEFLVYASSOAVMGVSQSDFSALWDSIASDPRDFSGARSKIMSVSVAASGCEPLRVLLVSPGLIIOQPTPLRLTDDSKPOIIRTLFESMLPGVOKPEVEVLVCGIKPPLITP 250  
126 EYIINQLKANYILNKNRLEILPQRIQKDLVYSKHFHIEKICSLYREYIDYNIQINGEEESPVKITHCYDNEYLDQIQNDSSSDHVHLTIGDFLHEQLPSFLIFSPYMFIIVNGIQIPLNTP 250  
126 EYIINQLKANYILNKNRLEILPQRIQKDLVYSKHFHIEKICSLYREYIDYNIQINGEEESPVKITHCYDNEYLDQIQNDSSSDHVHLTIGDFLHEQLPSFLIFSPYMFIIVNGIQIPLNTP 250  
126 EYIINQLKANYILNKNRLEILPQRIQKDLVYSKHFHIEKICSLYREYIDYNIQINGEEESPVKITHCYDNEYLDQIQNDSSSDHVHLTIGDFLHEQLPSFLIFSPYMFIIVNGIQIPLNTP 250  
126 IRFLNTLKEFLVYASSOAVMGVSQSDFSALWDSIASDPRDFSGARSKIMSVSVAASGCEPLRVLLVSPGLIIOQPTPLRLTDDSKPOIIRTLFESMLPGVOKPEVEVLVCGIKPPLITP 247  
125 SFFNNALKEFLVYASSOAVMGVSQSDFSALWDSIASDPRDFSGARSKIMSVSVAASGCEPLRVLLVSPGLIIOQPTPLRLTDDSKPOIIRTLFESMLPGVOKPEVEVLVCGIKPPLITP 243  
123 KVMVNOFQALVYONSLAPGKLGKQQQDTLWESIKSSNVEAFKVTQNSDOLLFRNLTCRSLAVRLICAGQVLLHPLAPLREDTISRVDOLFKEAMRV-----VELIMHGIRPLEP 241  
125 KIRFALKESLHIFDSQDTILMOAEKQNWESIKNLLNQTFSSILDOIQLKLQNNKAIKLPVRVY-IEEYIQOLSSQID-SENIGDFLTKYFKKINDNKNYKVICNGIVGNLNM 244  
119 SFFHSLKOCVFLSSNNVAAVSAKSKSDQDTLWSGVKADNLLVFPVYHSIFGKH-----LIRYPPRLILRFNEOVDVPTORPILDCGGRRLRECLQOIIPGVLCQOQSEIGITVOGVRVALNIP 243  
124 WNFINALKEAAYIITGNCKNIMNMSQSDQTELWRSVLNQLAEVLRVSSKLLDITDATSGKIPVRLVY-----RTIEEDVD-----ELEB-----VEVIL-DSWVKVHYINS-----PVE----- 223  
126 SFFHSLKOCVFLSSNNVAAVSAKSKSDQDTLWSGVKADNLLVFPVYHSIFGKH-----LIRYPPRLILRFNEOVDVPTORPILDCGGRRLRECLQOIIPGVLCQOQSEIGITVOGVRVALNIP 214  
114 KAFVHALKQAVHLRQRTARALQDAALFALADOLSAAFSRFRTRKAALLEHRA-----PRGPPPAWR-LAL-LAFALDQDQRDCLADARRATLS-DOBIVVVEEHHVTMAY----- 224  
115 GEFPHLFRGMPFLNRSRLRLREHDDADLWESIAEEDRMVITLORMEYFA-----PKAAPVRILOQVRAI-LSQVPPFLDSSL-----FACELVDDILGL-----DSRKLRCOGILPADAL 227  
122 QLFRRARKEATFLSSSVSTIMSLELQOQALWQAY-LDISQRRHISGIGTELSEROGROPIRVRY-LGDO-----TLLRPLA-EEAFVQQLQSL-----DOAEACQWQVQKVEA 235  
123 WALVNSLKEATVLRHNSRAVMSKESQOMLDGLVEHNKRKWSVNOGLDSD-----CRYVPILFDLCKG-EVKPIPFDDSGKHTLNTLNMIMRHTLHIFRILASLLQSLQICQOAP 241  
124 WALVNSLKEATVLRHNSRAVMSKESQOMLDGLVEHNKRKWSVNOGLDSDSTG-CRYVPILRILV-FDALFVQKPIPFDDSGKHTLNTLNMIMRHTLHIFRILASLLQSLQICQOAP 241  
122 WALVNSLKEAMVYHSGAKAMALTKDSQQHFOFKLHNRFRVMSQOQLQVEYDGHGVKQVHIFRFRFLRCQFVQKPIPFDDSGKHTLNTLNMIMRHTLHIFRILASLLQSLQICQOAP 241  
122 WNFHSLKOCVFLSSNNVAAVSAKSKSDQDTLWSGVKADNLLVFPVYHSIFGKH-----LIRYPPRLILRFNEOVDVPTORPILDCGGRRLRECLQOIIPGVLCQOQSEIGITVOGVRVALNIP 243  
123 WNVNSLKEAMVYHSGAKAMALTKDSQQHFOFKLHNRFRVMSQOQLQVEYDGHGVKQVHIFRFRFLRCQFVQKPIPFDDSGKHTLNTLNMIMRHTLHIFRILASLLQSLQICQOAP 241  
123 WNVNSLKEAMVYHSGAKAMALTKDSQQHFOFKLHNRFRVMSQOQLQVEYDGHGVKQVHIFRFRFLRCQFVQKPIPFDDSGKHTLNTLNMIMRHTLHIFRILASLLQSLQICQOAP 241  
24 RLSIGLGA-----EQ-----PRALIPRVY-TAQTWRLPVQSGSAGQCLSHALATLLQOL-TFFPALVOGIRPLITP 94  
125 ALVRGALKESLHIFDSQDTILMOAEKQNWESIKNLLNQTFSSILDOIQLKLQNNKAIKLPVRVY-IEEYIQOLSSQID-SENIGDFLTKYFKKINDNKNYKVICNGIVGNLNM 244  
125 ALVRGALKESLHIFDSQDTILMOAEKQNWESIKNLLNQTFSSILDOIQLKLQNNKAIKLPVRVY-IEEYIQOLSSQID-SENIGDFLTKYFKKINDNKNYKVICNGIVGNLNM 244  
123 ALVRGALKESLHIFDSQDTILMOAEKQNWESIKNLLNQTFSSILDOIQLKLQNNKAIKLPVRVY-IEEYIQOLSSQID-SENIGDFLTKYFKKINDNKNYKVICNGIVGNLNM 243  
123 WALVNSLKEAMVYHSGAKAMALTKDSQQHFOFKLHNRFRVMSQOQLQVEYDGHGVKQVHIFRFRFLRCQFVQKPIPFDDSGKHTLNTLNMIMRHTLHIFRILASLLQSLQICQOAP 241  
122 WALVNSLKEAMVYHSGAKAMALTKDSQQHFOFKLHNRFRVMSQOQLQVEYDGHGVKQVHIFRFRFLRCQFVQKPIPFDDSGKHTLNTLNMIMRHTLHIFRILASLLQSLQICQOAP 241  
122 WNFHSLKOCVFLSSNNVAAVSAKSKSDQDTLWSGVKADNLLVFPVYHSIFGKH-----LIRYPPRLILRFNEOVDVPTORPILDCGGRRLRECLQOIIPGVLCQOQSEIGITVOGVRVALNIP 243  
123 WNVNSLKEAMVYHSGAKAMALTKDSQQHFOFKLHNRFRVMSQOQLQVEYDGHGVKQVHIFRFRFLRCQFVQKPIPFDDSGKHTLNTLNMIMRHTLHIFRILASLLQSLQICQOAP 241  
24 RLSIGLGA-----EQ-----PRALIPRVY-TAQTWRLPVQSGSAGQCLSHALATLLQOL-TFFPALVOGIRPLITP 94  
125 ALVRGALKESLHIFDSQDTILMOAEKQNWESIKNLLNQTFSSILDOIQLKLQNNKAIKLPVRVY-IEEYIQOLSSQID-SENIGDFLTKYFKKINDNKNYKVICNGIVGNLNM 244  
125 ALVRGALKESLHIFDSQDTILMOAEKQNWESIKNLLNQTFSSILDOIQLKLQNNKAIKLPVRVY-IEEYIQOLSSQID-SENIGDFLTKYFKKINDNKNYKVICNGIVGNLNM 244  
123 ALVRGALKESLHIFDSQDTILMOAEKQNWESIKNLLNQTFSSILDOIQLKLQNNKAIKLPVRVY-IEEYIQOLSSQID-SENIGDFLTKYFKKINDNKNYKVICNGIVGNLNM 243  
123 WALVNSLKEAMVYHSGAKAMALTKDSQQHFOFKLHNRFRVMSQOQLQVEYDGHGVKQVHIFRFRFLRCQFVQKPIPFDDSGKHTLNTLNMIMRHTLHIFRILASLLQSLQICQOAP 241  
122 WALVNSLKEAMVYHSGAKAMALTKDSQQHFOFKLHNRFRVMSQOQLQVEYDGHGVKQVHIFRFRFLRCQFVQKPIPFDDSGKHTLNTLNMIMRHTLHIFRILASLLQSLQICQOAP 241  
122 WNFHSLKOCVFLSSNNVAAVSAKSKSDQDTLWSGVKADNLLVFPVYHSIFGKH-----LIRYPPRLILRFNEOVDVPTORPILDCGGRRLRECLQOIIPGVLCQOQSEIGITVOGVRVALNIP 243  
123 WNVNSLKEAMVYHSGAKAMALTKDSQQHFOFKLHNRFRVMSQOQLQVEYDGHGVKQVHIFRFRFLRCQFVQKPIPFDDSGKHTLNTLNMIMRHTLHIFRILASLLQSLQICQOAP 241  
24 RLSIGLGA-----EQ-----PRALIPRVY-TAQTWRLPVQSGSAGQCLSHALATLLQOL-TFFPALVOGIRPLITP 94  
125 ALVRGALKESLHIFDSQDTILMOAEKQNWESIKNLLNQTFSSILDOIQLKLQNNKAIKLPVRVY-IEEYIQOLSSQID-SENIGDFLTKYFKKINDNKNYKVICNGIVGNLNM 244  
125 ALVRGALKESLHIFDSQDTILMOAEKQNWESIKNLLNQTFSSILDOIQLKLQNNKAIKLPVRVY-IEEYIQOLSSQID-SENIGDFLTKYFKKINDNKNYKVICNGIVGNLNM 244  
123 ALVRGALKESLHIFDSQDTILMOAEKQNWESIKNLLNQTFSSILDOIQLKLQNNKAIKLPVRVY-IEEYIQOLSSQID-SENIGDFLTKYFKKINDNKNYKVICNGIVGNLNM 243  
123 WALVNSLKEAMVYHSGAKAMALTKDSQQHFOFKLHNRFRVMSQOQLQVEYDGHGVKQVHIFRFRFLRCQFVQKPIPFDDSGKHTLNTLNMIMRHTLHIFRILASLLQSLQICQOAP 241  
122 WALVNSLKEAMVYHSGAKAMALTKDSQQHFOFKLHNRFRVMSQOQLQVEYDGHGVKQVHIFRFRFLRCQFVQKPIPFDDSGKHTLNTLNMIMRHTLHIFRILASLLQSLQICQOAP 241  
122 WNFHSLKOCVFLSSNNVAAVSAKSKSDQDTLWSGVKADNLLVFPVYHSIFGKH-----LIRYPPRLILRFNEOVDVPTORPILDCGGRRLRECLQOIIPGVLCQOQSEIGITVOGVRVALNIP 243  
123 WNVNSLKEAMVYHSGAKAMALTKDSQQHFOFKLHNRFRVMSQOQLQVEYDGHGVKQVHIFRFRFLRCQFVQKPIPFDDSGKHTLNTLNMIMRHTLHIFRILASLLQSLQICQOAP 241  
24 RLSIGLGA-----EQ-----PRALIPRVY-TAQTWRLPVQSGSAGQCLSHALATLLQOL-TFFPALVOGIRPLITP 94  
125 ALVRGALKESLHIFDSQDTILMOAEKQNWESIKNLLNQTFSSILDOIQLKLQNNKAIKLPVRVY-IEEYIQOLSSQID-SENIGDFLTKYFKKINDNKNYKVICNGIVGNLNM 244  
125 ALVRGALKESLHIFDSQDTILMOAEKQNWESIKNLLNQTFSSILDOIQLKLQNNKAIKLPVRVY-IEEYIQOLSSQID-SENIGDFLTKYFKKINDNKNYKVICNGIVGNLNM 244  
123 ALVRGALKESLHIFDSQDTILMOAEKQNWESIKNLLNQTFSSILDOIQLKLQNNKAIKLPVRVY-IEEYIQOLSSQID-SENIGDFLTKYFKKINDNKNYKVICNGIVGNLNM 243  
123 WALVNSLKEAMVYHSGAKAMALTKDSQQHFOFKLHNRFRVMSQOQLQVEYDGHGVKQVHIFRFRFLRCQFVQKPIPFDDSGKHTLNTLNMIMRHTLHIFRILASLLQSLQICQOAP 241  
122 WALVNSLKEAMVYHSGAKAMALTKDSQQHFOFKLHNRFRVMSQOQLQVEYDGHGVKQVHIFRFRFLRCQFVQKPIPFDDSGKHTLNTLNMIMRHTLHIFRILASLLQSLQICQOAP 241  
122 WNFHSLKOCVFLSSNNVAAVSAKSKSDQDTLWSGVKADNLLVFPVYHSIFGKH-----LIRYPPRLILRFNEOVDVPTORPILDCGGRRLRECLQOIIPGVLCQOQSEIGITVOGVRVALNIP 243  
123 WNVNSLKEAMVYHSGAKAMALTKDSQQHFOFKLHNRFRVMSQOQLQVEYDGHGVKQVHIFRFRFLRCQFVQKPIPFDDSGKHTLNTLNMIMRHTLHIFRILASLLQSLQICQOAP 241  
24 RLSIGLGA-----EQ-----PRALIPRVY-TAQTWRLPVQSGSAGQCLSHALATLLQOL-TFFPALVOGIRPLITP 94  
125 ALVRGALKESLHIFDSQDTILMOAEKQNWESIKNLLNQTFSSILDOIQLKLQNNKAIKLPVRVY-IEEYIQOLSSQID-SENIGDFLTKYFKKINDNKNYKVICNGIVGNLNM 244  
125 ALVRGALKESLHIFDSQDTILMOAEKQNWESIKNLLNQTFSSILDOIQLKLQNNKAIKLPVRVY-IEEYIQOLSSQID-SENIGDFLTKYFKKINDNKNYKVICNGIVGNLNM 244  
123 ALVRGALKESLHIFDSQDTILMOAEKQNWESIKNLLNQTFSSILDOIQLKLQNNKAIKLPVRVY-IEEYIQOLSSQID-SENIGDFLTKYFKKINDNKNYKVICNGIVGNLNM 243  
123 WALVNSLKEAMVYHSGAKAMALTKDSQQHFOFKLHNRFRVMSQOQLQVEYDGHGVKQVHIFRFRFLRCQFVQKPIPFDDSGKHTLNTLNMIMRHTLHIFRILASLLQSLQICQOAP 241  
122 WALVNSLKEAMVYHSGAKAMALTKDSQQHFOFKLHNRFRVMSQOQLQVEYDGHGVKQVHIFRFRFLRCQFVQKPIPFDDSGKHTLNTLNMIMRHTLHIFRILASLLQSLQICQOAP 241  
122 WNFHSLKOCVFLSSNNVAAVSAKSKSDQDTLWSGVKADNLLVFPVYHSIFGKH-----LIRYPPRLILRFNEOVDVPTORPILDCGGRRLRECLQOIIPGVLCQOQSEIGITVOGVRVALNIP 243  
123 WNVNSLKEAMVYHSGAKAMALTKDSQQHFOFKLHNRFRVMSQOQLQVEYDGHGVKQVHIFRFRFLRCQFVQKPIPFDDSGKHTLNTLNMIMRHTLHIFRILASLLQSLQICQOAP 241  
24 RLSIGLGA-----EQ-----PRALIPRVY-TAQTWRLPVQSGSAGQCLSHALATLLQOL-TFFPALVOGIRPLITP 94  
125 ALVRGALKESLHIFDSQDTILMOAEKQNWESIKNLLNQTFSSILDOIQLKLQNNKAIKLPVRVY-IEEYIQOLSSQID-SENIGDFLTKYFKKINDNKNYKVICNGIVGNLNM 244  
125 ALVRGALKESLHIFDSQDTILMOAEKQNWESIKNLLNQTFSSILDOIQLKLQNNKAIKLPVRVY-IEEYIQOLSSQID-SENIGDFLTKYFKKINDNKNYKVICNGIVGNLNM 244  
123 ALVRGALKESLHIFDSQDTILMOAEKQNWESIKNLLNQTFSSILDOIQLKLQNNKAIKLPVRVY-IEEYIQOLSSQID-SENIGDFLTKYFKKINDNKNYKVICNGIVGNLNM 243  
123 WALVNSLKEAMVYHSGAKAMALTKDSQQHFOFKLHNRFRVMSQOQLQVEYDGHGVKQVHIFRFRFLRCQFVQKPIPFDDSGKHTLNTLNMIMRHTLHIFRILASLLQSLQICQOAP 241  
122 WALVNSLKEAMVYHSGAKAMALTKDSQQHFOFKLHNRFRVMSQOQLQVEYDGHGVKQVHIFRFRFLRCQFVQKPIPFDDSGKHTLNTLNMIMRHTLHIFRILASLLQSLQICQOAP 241  
122 WNFHSLKOCVFLSSNNVAAVSAKSKSDQDTLWSGVKADNLLVFPVYHSIFGKH-----LIRYPPRLILRFNEOVDVPTORPILDCGGRRLRECLQOIIPGVLCQOQSEIGITVOGVRVALNIP 243  
123 WNVNSLKEAMVYHSGAKAMALTKDSQQHFOFKLHNRFRVMSQOQLQVEYDGHGVKQVHIFRFRFLRCQFVQKPIPFDDSGKHTLNTLNMIMRHTLHIFRILASLLQSLQICQOAP 241  
24 RLSIGLGA-----EQ-----PRALIPRVY-TAQTWRLPVQSGSAGQCLSHALATLLQOL-TFFPALVOGIRPLITP 94  
125 ALVRGALKESLHIFDSQDTILMOAEKQNWESIKNLLNQTFSSILDOIQLKLQNNKAIKLPVRVY-IEEYIQOLSSQID-SENIGDFLTKYFKKINDNKNYKVICNGIVGNLNM 244  
125 ALVRGALKESLHIFDSQDTILMOAEKQNWESIKNLLNQTFSSILDOIQLKLQNNKAIKLPVRVY-IEEYIQOLSSQID-SENIGDFLTKYFKKINDNKNYKVICNGIVGNLNM 244  
123 ALVRGALKESLHIFDSQDTILMOAEKQNWESIKNLLNQTFSSILDOIQLKLQNNKAIKLPVRVY-IEEYIQOLSSQID-SENIGDFLTKYFKKINDNKNYKVICNGIVGNLNM 243  
123 WALVNSLKEAMVYHSGAKAMALTKDSQQHFOFKLHNRFRVMSQOQLQVEYDGHGVKQVHIFRFRFLRCQFVQKPIPFDDSGKHTLNTLNMIMRHTLHIFRILASLLQSLQICQOAP 241  
122 WALVNSLKEAMVYHSGAKAMALTKDSQQHFOFKLHNRFRVMSQOQLQVEYDGHGVKQVHIFRFRFLRCQFVQKPIPFDDSGKHTLNTLNMIMRHTLHIFRILASLLQSLQICQOAP 241  
122 WNFHSLKOCVFLSSNNVAAVSAKSKSDQDTLWSGVKADNLLVFPVYHSIFGKH-----LIRYPPRLILRFNEOVDVPTORPILDCGGRRLRECLQOIIPGVLCQOQSEIGITVOGVRVALNIP 243  
123 WNVNSLKEAMVYHSGAKAMALTKDSQQHFOFKLHNRFRVMSQOQLQVEYDGHGVKQVHIFRFRFLRCQFVQKPIPFDDSGKHTLNTLNMIMRHTLHIFRILASLLQSLQICQOAP 241  
24 RLSIGLGA-----EQ-----PRALIPRVY-TAQTWRLPVQSGSAGQCLSHALATLLQOL-TFFPALVOGIRPLITP 94  
125 ALVRGALKESLHIFDSQDTILMOAEKQNWESIKNLLNQTFSSILDOIQLKLQNNKAIKLPVRVY-IEEYIQOLSSQID-SENIGDFLTKYFKKINDNKNYKVICNGIVGNLNM 244  
125 ALVRGALKESLHIFDSQDTILMOAEKQNWESIKNLLNQTFSSILDOIQLKLQNNKAIKLPVRVY-IEEYIQOLSSQID-SENIGDFLTKYFKKINDNKNYKVICNGIVGNLNM 244  
123 ALVRGALKESLHIFDSQDTILMOAEKQNWESIKNLLNQTFSSILDOIQLKLQNNKAIKLPVRVY-IEEYIQOLSSQID-SENIGDFLTKYFKKINDNKNYKVICNGIVGNLNM 243  
123 WALVNSLKEAMVYHSGAKAMALTKDSQQHFOFKLHNRFRVMSQOQLQVEYDGHGVKQVHIFRFRFLRCQFVQKPIPFDDSGKHTLNTLNMIMRHTLHIFRILASLLQSLQICQOAP 241  
122 WALVNSLKEAMVYHSGAKAMALTKDSQQHFOFKLHNRFRVMSQOQLQVEYDGHGVKQVHIFRFRFLRCQFVQKPIPFDDSGKHTLNTLNMIMRHTLHIFRILASLLQSLQICQOAP 241  
122 WNFHSLKOCVFLSSNNVAAVSAKSKSDQDTLWSGVKADNLLVFPVYHSIFGKH-----LIRYPPRLILRFNEOVDVPTORPILDCGGRRLRECLQOIIPGVLCQOQSEIGITVOGVRVALNIP 243  
123 WNVNSLKEAMVYHSGAKAMALTKDSQQHFOFKLHNRFRVMSQOQLQVEYDGHGVKQVHIFRFRFLRCQFVQKPIPFDDSGKHTLNTLNMIMRHTLHIFRILASLLQSLQICQOAP 241  
24 RLSIGLGA-----EQ-----PRALIPRVY-TAQTWRLPVQSGSAGQCLSHALATLLQOL-TFFPALVOGIRPLITP 94  
125 ALVRGALKESLHIFDSQDTILMOAEKQNWESIKNLLNQTFSSILDOIQLKLQNNKAIKLPVRVY-IEEYIQOLSSQID-SENIGDFLTKYFKKINDNKNYKVICNGIVGNLNM 244  
125 ALVRGALKESLHIFDSQDTILMOAEKQNWESIKNLLNQTFSSILDOIQLKLQNNKAIKLPVRVY-IEEYIQOLSSQID-SENIGDFLTKYFKKINDNKNYKVICNGIVGNLNM 244  
123 ALVRGALKESLHIFDSQDTILMOAEKQNWESIKNLLNQTFSSILDOIQLKLQNNKAIKLPVRVY-IEEYIQOLSSQID-SENIGDFLTKYFKKINDNKNYKVICNGIVGNLNM 243  
123 WALVNSLKEAMVYHSGAKAMALTKDSQQHFOFKLHNRFRVMSQOQLQVEYDGHGVKQVHIFRFRFLRCQFVQKPIPFDDSGKHTLNTLNMIMRHTLHIFRILASLLQSLQICQOAP 241  
122 WALVNSLKEAMVYHSGAKAMALTKDSQQHFOFKLHNRFRVMSQOQLQVEYDGHGVKQVHIFRFRFLRCQFVQKPIPFDDSGKHTLNTLNMIMRHTLHIFRILASLLQSLQICQOAP 241  
122 WNFHSLKOCVFLSSNNVAAVSAKSKSDQDTLWSGVKADNLLVFPVYHSIFGKH-----LIRYPPRLILRFNEOVDVPTORPILDCGGRRLRECLQOIIPGVLCQOQSEIGITVOGVRVALNIP 243  
123 WNVNSLKEAMVYHSGAKAMALTKDSQQHFOFKLHNRFRVMSQOQLQVEYDGHGVKQVHIFRFRFLRCQFVQKPIPFDDSGKHTLNTLNMIMRHTLHIFRILASLLQSLQICQOAP 241  
24 RLSIGLGA-----EQ-----PRALIPRVY-TAQTWRLPVQSGSAGQCLSHALATLLQOL-TFFPALVOGIRPLITP 94  
125 ALVRGALKESLHIFDSQDTILMOAEKQNWESIKNLLNQTFSSILDOIQLKLQNNKAIKLPVRVY-IEEYIQOLSSQID-SENIGDFLTKYFKKINDNKNYKVICNGIVGNLNM 244  
125 ALVRGALKESLHIFDSQDTILMOAEKQNWESIKNLLNQTFSSILDOIQLKLQNNKAIKLPVRVY-IEEYIQOLSSQID-SENIGDFLTKYFKKINDNKNYKVICNGIVGNLNM 244  
123 ALVRGALKESLHIFDSQDTILMOAEKQNWESIKNLLNQTFSSILDOIQLKLQNNKAIKLPVRVY-IEEYIQOLSSQID-SENIGDFLTKYFKKINDNKNYKVICNGIVGNLNM 243  
123 WALVNSLKEAMVYHSGAKAMALTKDSQQHFOFKLHNRFRVMSQOQLQVEYDGHGVKQVHIFRFRFLRCQFVQKPIPFDDSGKHTLNTLNMIMRHTLHIFRILASLLQSLQICQOAP 241  
122 WALVNSLKEAMVYHSGAKAMALTKDSQQHFOFKLHNRFRVMSQOQLQVEYDGHGVKQVHIFRFRFLRCQFVQKPIPFDDSGKHTLNTLNMIMRHTLHIFRILASLLQSLQICQOAP 241  
122 WNFHSLKOCVFLSSNNVAAVSAKSKSDQDTLWSGVKADNLLVFPVYHSIFGKH-----LIRYPPRLILRFNEOVDVPTORPILDCGGRRLRECLQOIIPGVLCQOQSEIGITVOGVRVALNIP 243  
123 WNVNSLKEAMVYHSGAKAMALTKDSQQHFOFKLHNRFRVMSQOQLQVEYDGHGVKQVHIFRFRFLRCQFVQKPIPFDDSGKHTLNTLNMIMRHTLHIFRILASLLQSLQICQOAP 241  
24 RLSIGLGA-----EQ-----PRALIPRVY-TAQTWRLPVQSGSAGQCLSHALATLLQOL-TFFPALVOGIRPLITP 94  
125 ALVRGALKESLHIFDSQDTILMOAEKQNWESIKNLLNQTFSSILDOIQLKLQNNKAIKLPVRVY-IEEYIQOLSSQID-SENIGDFLTKYFKKINDNKNYKVICNGIVGNLNM 244  
125 ALVRGALKESLHIFDSQDTILMOAEKQNWESIKNLLNQTFSSILDOIQLKLQNNKAIKLPVRVY-IEEYIQOLSSQID-SENIGDFLTKYFKKINDNKNYKVICNGIVGNLNM 244  
123 ALVRGALKESLHIFDSQDTILMOAEKQNWESIKNLLNQTFSSILDOIQLKLQNNKAIKLPVRVY-IEEYIQOLSSQID-SENIGDFLTKYFKKINDNKNYKVICNGIVGNLNM 243  
123 WALVNSLKEAMVYHSGAKAMALTKDSQQHFOFKLHNRFRVMSQOQLQVEYDGHGVKQVHIFRFRFLRCQFVQKPIPFDDSGKHTLNTLNMIMRHTLHIFRILASLLQSLQICQOAP 241  
122 WALVNSLKEAMVYHSGAKAMALTKDSQQHFOFKLHNRFRVMSQOQLQVEYDGHGVKQVHIFRFRFLRCQFVQKPIPFDDSGKHTLNTLNMIMRHTLHIFRILASLLQSLQICQOAP 241  
122 WNFHSLKOCVFLSSNNVAAVSAKSKSDQDTLWSGVKADNLLVFPVYHSIFGKH-----LIRYPPRLILRFNEOVDVPTORPILDCGGRRLRECLQOIIPGVLCQOQSEIGITVOGVRVALNIP 243  
123 WNVNSLKEAMVYHSGAKAMALTKDSQQHFOFKLHNRFRVMSQOQLQVEYDGHGVKQVHIFRFRFLRCQFVQKPIPFDDSGKHTLNTLNMIMRHTLHIFRILASLLQSLQICQOAP 241  
24 RLSIGLGA-----EQ-----PRALIPRVY-TAQTWRLPVQSGSAGQCLSHALATLLQOL-TFFPALVOGIRPLITP 94  
125 ALVRGALKESLHIFDSQDTILMOAEKQNWESIKNLLNQTFSSILDOIQLKLQNNKAIKLPVRVY-IEEYIQOLSSQID-SENIGDFLTKYFKKINDNKNYKVICNGIVGNLNM 244  
125 ALVRGALKESLHIFDSQDTILMOAEKQNWESIKNLLNQTFSSILDOIQLKLQNNKAIKLPVRVY-IEEYIQOLSSQID-SENIGDFLTKYFKKINDNKNYKVICNGIVGNLNM 244  
123 ALVRGALKESLHIFDSQDTILMOAEKQNWESIKNLLNQTFSSILDOIQLKLQNNKAIKLPVRVY-IEEYIQOLSSQID-SENIGDFLTKYFKKINDNKNYKVICNGIVGNLNM 243  
123 WALVNSLKEAMVYHSGAKAMALTKDSQQHFOFKLHNRFRVMSQOQLQVEYDGHGVKQVHIFRFRFLRCQFVQKPIPFDDSGKHTLNTLNMIMRHTLHIFRILASLLQSLQICQOAP 241  
122 WALVNSLKEAMVYHSGAKAMALTKDSQQHFOFKLHNRFRVMSQOQLQVEYDGHGVKQVHIFRFRFLRCQFVQKPIPFDDSGKHTLNTLNMIMRHTLHIFRILASLLQSLQICQOAP 241  
122 WNFHSLKOCVFLSSNNVAAVSAKSKSDQDTLWSGVKADNLLVFPVYHSIFGKH-----LIRYPPRLILRFNEOVDVPTORPILDCGGRRLRECLQOIIPGVLCQOQSEIGITVOGVRVALNIP 243  
123 WNVNSLKEAMVYHSGAKAMALTKDSQQHFOFKLHNRFRVMSQOQLQVEYDGHGVKQVHIFRFRFLRCQFVQKPIPFDDSGKHTLNTLNMIMRHTLHIFRILASLLQSLQICQOAP 241  
24 RLSIGLGA-----EQ-----PRALIPRVY-TAQTWRLPVQSGSAGQCLSHALATLLQOL-TFFPALVOGIRPLITP 94  
125 ALVRGALKESLHIFDSQDTILMOAEKQNWESIKNLLNQTFSSILDOIQLKLQNNKAIKLPVRVY-IEEYIQOLSSQID-SENIGDFLTKYFKKINDNKNYKVICNGIVGNLNM 244  
125 ALVRGALKESLHIFDSQDTILMOAEKQNWESIKNLLNQTFSSILDOIQLKLQNNKAIKLPVRVY-IEEYIQOLSSQID-SENIGDFLTKYFKKINDNKNYKVICNGIVGNLNM 244  
123 ALVRGALKESLHIFDSQDTILMOAEKQNWESIKNLLNQTFSSILDOIQLKLQNNKAIKLPVRVY-IEEYIQOLSSQID-SENIGDFLTKYFKKINDNKNYKVICNGIVGNLNM 243  
123 WALVNSLKEAMVYHSGAKAMALTKDSQQHFOFKLHNRFRVMSQOQLQVEYDGHGVKQVHIFRFRFLRCQFVQKPIPFDDSGKHTLNTLNMIMRHTLHIFRILASLLQSLQICQOAP 241  
122 WALVNSLKEAMVYHSGAKAMALTKDSQQHFOFKLHNRFRVMSQOQLQVEYDGHGVKQVHIFRFRFLRCQFVQKPIPFDDSGKHTLNTLNMIMRHTLHIFRILASLLQSLQICQOAP 241  
122 WNFHSLKOCVFLSSNNVAAVSAKSKSDQDTLWSGVKADNLLVFPVYHSIFGKH-----LIRYPPRLILRFNEOVDVPTORPILDCGGRRLRECLQOIIPGVLCQOQSEIGITVOGVRVALNIP 243  
123 WNVNSLKEAMVYHSGAKAMALTKDSQQHFOFKLHNRFRVMSQOQLQVEYDGHGVKQVHIFRFRFLRCQFVQKPIPFDDSGKHTLNTLNMIMRHTLHIFRILASLLQSLQICQOAP 241  
24 RLSIGLGA-----EQ-----PRALIPRVY-TAQTWRLPVQSGSAGQCLSHALATLLQOL-TFFPALVOGIRPLITP 94  
125 ALVRGALKESLHIFDSQDTILMOAEKQNWESIKNLLNQTFSSILDOIQLKLQNNKAIKLPVRVY-IEEYIQOLSSQID-SENIGDFLTKYFKKINDNKNYKVICNGIVGNLNM 244  
125 ALVRGALKESLHIFDSQDTILMOAEKQNWESIKNLLNQTFSSILDOIQLKLQNNKAIKLPVRVY-IEEYIQOLSSQID-SENIGDFLTKYFKKINDNKNYKVICNGIVGNLNM 244  
123 ALVRGALKESLHIFDSQDTILMOAEKQNWESIKNLLNQTFSSILDOIQLKLQNNKAIKLPVRVY-IEEYIQOLSSQID-SENIGDFLTKYFKKINDNKNYKVICNGIVGNLNM 243  
123 WALVNSLKEAMVYHSGAKAMALTKDSQQHFOFKLHNRFRVMSQOQLQVEYDGHGVKQVHIFRFRFLRCQFVQKPIPFDDSGKHTLNTLNMIMRHTLHIFRILASLLQSLQICQOAP 241  
122 WALVNSLKEAMVYHSGAKAMALTKDSQQHFOFKLHNRFRVMSQOQLQVEYDGHGVKQVHIFRFRFLRCQFVQKPIPFDDSGKHTLNTLNMIMRHTLHIFRILASLLQSLQICQOAP 241  
122 WNFHSLKOCVFLSSNNVAAVSAKSKSDQDTLWSGV

|                                                        |     |                                                   |     |
|--------------------------------------------------------|-----|---------------------------------------------------|-----|
| Rhizaria_Amonia[seq_59]ATG5                            | 244 | M I W L V R H A T V A D C F L Y V V I V K K - - - | 265 |
| Rhizaria_Globobulimina[seq_62]ATG5                     | 247 | I M W L V R H A T V A D C F L Y V V I V K Y - - - | 268 |
| Rhizaria_Eucyrtidium[seq_61]ATG5                       | 197 | Q V L I R T A R N P D L F L H V I R R K K E E     | 221 |
| Rhizaria_Bigelowiella[seq_60]ATG5                      | 236 | F Y L A E N M C A D O F L Y I C L S L H T T E     | 260 |
| Rhizaria_Paulinella[seq_63]ATG5                        | 248 | L R W L G S Y F V H P D F W L Y V V V I V H S A S | 272 |
| Alveolata_Toxoplasma[AAQM03000026-2-330440-333361]ATG5 | 251 | L Y W L W K N A S C M D L F L H V V V L P P T V   | 275 |
| Alveolata_Plasmodium[ETW28760.1]ATG5                   | 251 | L Y W L A A N F S O F D H F L H I T I R I P P Y - | 274 |
| Alveolata_Plasmodium[ETW39978.1]ATG5                   | 251 | L Y W L A A N F S O F D H F L H I T I R I P P Y - | 274 |
| Alveolata_Plasmodium[KOB58748.1]ATG5                   | 251 | L Y W L A A N F S O F D H F L H I T I R I P P Y - | 274 |
| Alveolata_Plasmodium[KOB85177.1]ATG5                   | 251 | L Y W L A A N F S O F D H F L H I T I R I P P Y - | 274 |
| Alveolata_Vitrella[AOA6U4C230]ATG5                     | 248 | R W L A L Y G L R C C C L H I V V R L P R A L     | 272 |
| Alveolata_Chromera[AOA6U4V462]ATG5                     | 244 | I A G L I S S A L A P D G S V Y I V V R V P C H L | 268 |
| Alveolata_Karenia[AOA6T6A5D3]ATG5                      | 242 | L Y W L A L N G S Y L D L F V H L V A R V P B H L | 266 |
| Alveolata_Tetrahymena[seq_0]ATG5                       | 245 | L L F Y K Y F S Y D G F T Y L C I Q K - - - -     | 265 |
| Stramenopiles_Phytophthora[seq_67]ATG5                 | 241 | I V E L R N F A Y A D G F L Y V A L S S K S - -   | 263 |
| Stramenopiles_Peronospora[seq_65]ATG5                  | 224 | V R G E G K S F T L N D S I K A L L P Q L F T K E | 248 |
| Stramenopiles_Peronospora[seq_66]ATG5                  |     | -----                                             |     |
| Stramenopiles_Aureococcus[AOA6S9GGBQ]ATG5              | 225 | V V D A A P D V A D R R P F S H V V V K L S T A G | 249 |
| Stramenopiles_Aurantiochytrium[seq_64]ATG5             | 228 | V D L I E A L A H A D M F L Y I C L Y T D E T -   | 251 |
| Telonemia_SRR7371266[seq_68]ATG5                       | 232 | Q C E L V L R H P P D F L H M S L I T A I M G     | 256 |
| Centrohelida_Raineriophrys[seq_10]ATG5                 | 242 | N H N L S S O C P Q H F L H L R I H I H L T       | 266 |
| Centrohelida_Raineriophrys[seq_11]ATG5                 | 242 | L L W G D N L M S G D G F V Y V K V M T S T Q     | 266 |
| Centrohelida_Raphidiophrys[seq_12]ATG5                 | 242 | T Y P S H H N T N N N N N N N N N N N N N         | 266 |
| Centrohelida_Choanocystis[seq_9]ATG5                   | 244 | L A W L M N N A T S A D D F Y V I T V R M S T A   | 268 |
| Centrohelida_Acanthocystis[seq_8]ATG5                  | 247 | L A V I M D H C C G D F I Y V I I S I S A T A     | 271 |
| Haptophyta_Calcidiscus[seq_37]ATG5                     | 95  | L W L Y R W C C P D G - - - - - - - - - -         | 107 |
| Haptophyta_Isochrysis[AOA6T1HWS]ATG5                   |     | -----                                             |     |
| Haptophyta_Isochrysis[AOA6T1HN54]ATG5                  | 244 | I L P S G A V T V G B A L G L L P G T A E G G     | 268 |
| Haptophyta_Emiliana[AOA6L241]ATG5                      | 246 | S W L I E A S S P D G F L Y V V L M P G S G       | 270 |
| Haptophyta_Prymnesium[AOA6T0B7T7]ATG5                  | 248 | L W L I G A C S P D G F L Y Y V Y S C S P S       | 272 |
| Haptophyta_Pavlova[seq_38]ATG5                         | 245 | D W L C A A C A H P D G F L H V V L H A R A T     | 269 |
| Cryptista_Guillardia[XP_005835979.1]ATG5               | 249 | V L W L G O O L A G A D T F L Y I C V I P K S K D | 273 |
| Cryptista_Rhodomonas[AOA6U4PNF5]ATG5                   | 248 | V L W L G O O L A A C D G F L Y V S L V P T R A E | 272 |
| Cryptista_Goniomonas[seq_18]ATG5                       | 239 | I W L A S T I F G - - - - F T C R R G P V A P     | 259 |
| Cryptista_Goniomonas[AOA6T1QN56]ATG5                   | 246 | L W L A D N L A S I D N F L Y F V P S G S G G     | 270 |
| Cryptista_Palpatomonas[seq_19]ATG5                     | 236 | A E W L L Y A C N P D T S L N I A L R K R K - -   | 258 |
| Glaucophyta_Gleocochaete[AOA6T1G970]ATG5               | 173 | Q W L V E H F C P A D G F V T I A L A A N B K L   | 197 |
| Glaucophyta_Gleocochaete[seq_36]ATG5                   | 239 | Q A M M E M A H P D F L Y V V M I O I - - -       | 260 |
| Chlorophyta_Ostreococcus[OUS45109.1]ATG5               | 223 | L A K I E A L R H V D G F L Y L V H C G T S S     | 247 |
| Chlorophyta_Micromonas[seq_16]ATG5                     | 246 | E L I H A S L R G P R F S H L V F S R A K - -     | 268 |
| Chlorophyta_Lobosphaera[seq_14]ATG5                    | 248 | V A W L H S R F S Y A D H F L Y V V V I Q H T - - | 270 |
| Chlorophyta_Lobosphaera[seq_15]ATG5                    | 198 | V T S A D T D C P C P T A M P S G L A A V R       | 222 |
| Chlorophyta_Chlamydomonas[PNW73408.1]ATG5              | 248 | L G V L H A A M S P D L F L Y V V V R L D E E G   | 272 |
| Chlorophyta_Chlamydomonas[XP_001692662.1]ATG5          | 203 | L H C T Q L C A C S S W L G L R L L - - - -       | 222 |
| Chlorophyta_Arabidopsis[seq_13]ATG5                    | 246 | F S W V V N N L M N P E F V L H I S V L V K A R Q | 270 |
| Chlorophyta_Cryzela[seq_17]ATG5                        | 249 | F L V A V A N L N K N P C H L H I C V Y V E R K   | 270 |
| Chlorophyta_Marchantia[PTQ44619.1]ATG5                 | 247 | D W V A R N L C P S M F I H L G I C T W M S R     | 271 |
| Ancoracysta_Ancoracysta[seq_4]ATG5                     | 236 | Q V L C D T L G P D L F L Y I S V A Q R E A F     | 260 |
| Hemimastigophora_Spironema[seq_39]ATG5                 | 210 | L V E L L D C F S C P D H F V V Y T I R E D T T E | 234 |
| Ancyromonadida_Nutomonas[seq_5]ATG5                    | 224 | V G L W K I A M N V D T W L W M A F D H Q K       | 248 |
| Malawimonadida_Malawimonas[seq_47]ATG5                 | 240 | V A W L W R N O M S A D N F L Y I V V V - - - -   | 259 |
| Metamonada_Tritrichomonas[OHT07224.1]ATG5              | 219 | L E E V V P I L L G A D G F I Y I V L K - - - -   | 238 |
| Metamonada_Trichomonas[DS11397-4-91101-90688]ATG5      | 118 | K T L I P T L V P D G F L Y V V V - - - - -       | 136 |
| Metamonada_Trichomonas[XP_001292688.1]ATG5             |     | -----                                             |     |
| Metamonada_Monocercomonoides[seq_49]ATG5               | 176 | V K D E A G I S A D V S L S S E A K E E E         | 200 |
| Metamonada_Monocercomonoides[seq_50]ATG5               | 242 | L A S E R N F B E E E E D A N K O D E A E         | 266 |
| Metamonada_Monocercomonoides[seq_48]ATG5               | 162 | F D W M A K E E E K E E E K E S E E E E E E       | 186 |
| Metamonada_Monocercomonoides[seq_51]ATG5               | 247 | M L L D L N F C F P E L F L R C A O R S F A R S   | 271 |
| Discoba_Rhynchopus[seq_25]ATG5                         | 241 | L W L T E Y M A H P D G F L H I V V S T A D R D   | 265 |
| Discoba_Diplonema[seq_22]ATG5                          | 217 | M I L Y L H L L Q H T D E L L H I S V L W E S V S | 241 |
| Discoba_Diplonema[seq_21]ATG5                          | 242 | L W L A E Y M A H P D C F L H I T I E T S S - -   | 264 |
| Discoba_Trypanosoma[XP_011774026.1]ATG5                | 239 | V K L L E R F T S A D G R L Y V I F T V F - -     | 260 |
| Discoba_Euglenia[seq_23]ATG5                           | 242 | L R F V A K - G S P D L W I Y L V L I R E T D     | 265 |
| Discoba_Naegleria[XP_002680539.1]ATG5                  | 247 | M L V L F E N G A H P D G F L M C K - - - -       | 266 |
| Discoba_Percolomonas[seq_24]ATG5                       | 232 | K S C C E L F M A D C F L Y M I A Y L E E E -     | 255 |
| Discoba_Percolomonas[AOA6U0JY83]ATG5                   | 248 | L F D V E A F S P Q D L L Y I V V V I E A S E     | 272 |
| Discoba_Andalucia[seq_20]ATG5                          | 236 | R F L R D V G A Y P D L L I H C V N R D G C       | 260 |
| Fungi_Saccharomyces[seq_34]ATG5                        | 233 | L Y D L S K L R S F D G F L Y I T L V I K G G     | 257 |
| Fungi_Komagataella[seq_32]ATG5                         | 248 | L I D L S Y F A F S D G F V H I S V V F N O P K   | 272 |
| Fungi_Schizosaccharomyces[seq_35]ATG5                  | 225 | L D E L N R D F C Y I D G F L H I V L M K V - -   | 246 |
| Fungi_Claroideoglomus[seq_28]ATG5                      | 242 | L W A S Q N L C P D N F L H I V V L L E T - -     | 264 |
| Fungi_Gigaspora[seq_30]ATG5                            | 240 | I W A S Q N L C P D N F L H I V V L L S I - -     | 262 |
| Fungi_Catenaria[seq_27]ATG5                            | 234 | L A V V R H L V C V D G M Y L V V E R I L K       | 258 |
| Fungi_Piromyces[seq_33]ATG5                            | 240 | L W L G O Y L S Y P D N W L H I V I K Q I K E -   | 263 |
| Fungi_Gonapodytes[seq_31]ATG5                          | 246 | V W L G M N M T Y A D G F V H V V R G A - - -     | 267 |
| Fungi_Batrachochytrium[seq_26]ATG5                     | 227 | L W L R H A S Y S D G F L H F V F Y T D - -       | 248 |
| Fungi_Forticula[seq_29]ATG5                            | 238 | C L W L M V N M C A D M F V H V L R H I - - -     | 259 |
| Metazoa_Homo[Q9H1Y0]ATG5                               | 247 | Q V L S E H L S Y P D N F L H I S I I P O R T D   | 271 |
| Metazoa_Xenopus[seq_58]ATG5                            | 247 | Q V L S E H L S Y P D N F L H I S I I P O R T D   | 271 |
| Metazoa_Danio[seq_54]ATG5                              | 248 | Q V L S E H L S Y P D N F L H I S I I P A B S D   | 272 |
| Metazoa_Drosophila[seq_57]ATG5                         | 242 | Q V L S E H L S Y P D N F L H S I D Y Q D V -     | 265 |
| Metazoa_Daphnia[seq_55]ATG5                            | 243 | Q V I S E H L S Y P D N F L H L C I R Y S Q T -   | 266 |
| Metazoa_Caenorhabditis[seq_52]ATG5                     | 238 | I F A A K N L S Y P D N F I H V L L L V V G -     | 261 |
| Metazoa_Dicymela[seq_56]ATG5                           | 227 | Q V L M N M S F P D G F I H - - - - - - - -       | 242 |
| Metazoa_Corticium[seq_53]ATG5                          | 240 | L Q F L R E H F S Y P D N F L H I A I V T R - -   | 261 |
| Holozoa_Helgocela[seq_42]ATG5                          | 239 | Q V L C E H F V P D N F L H I T V A T S A Q       | 263 |
| Holozoa_Stephanocela[seq_46]ATG5                       | 242 | Q V L C E H O T Y P D N F L H L T V F S A A V     | 266 |
| Holozoa_Salpingocela[seq_44]ATG5                       | 237 | Q V L A A H L A P D N F C H V V V H K L D Q S     | 261 |
| Holozoa_Capsaspora[XP_004348117.1]ATG5                 | 243 | L W L G E H C C P D N F L H I C I L - S E L       | 266 |
| Holozoa_Ichthyophonus[seq_43]ATG5                      | 198 | Q V L S D N L S Y P D N F L H I V I S F T D       | 222 |
| Holozoa_Creolimax[seq_41]ATG5                          | 245 | Q V L R D C S S Y P D N F L H I V R T C O S S R   | 269 |
| Holozoa_Sphaerothecum[seq_45]ATG5                      | 243 | I W L S E N M S Y P D N F L H I C I L P P R Q I   | 267 |
| Holozoa_Coralochytrium[seq_40]ATG5                     | 229 | L A W L S K A S Y A D N F L Y I F V K - - - -     | 248 |
| Amoebozoa_Entamoeba[DS571153-6-30394-29480]ATG5        | 229 | L W L A L N L S H S O L F L H V I I R K T D E L   | 253 |
| Amoebozoa_Dictyostelium[seq_2]ATG5                     | 242 | A W L Y E H F G P D N F L Y I V L I D S Q N       | 266 |
| Amoebozoa_Vermamoeba[seq_3]ATG5                        | 239 | V W L A N N L A H P D N F V Y I S L V H O N K     | 263 |
| Amoebozoa_Acanthamoeba[seq_1]ATG5                      | 242 | I L W L G E N A H P D N F L Y V V V K E N - - -   | 263 |
| CRuMs_Mantamonas[seq_6]ATG5                            | 213 | R E R E G K G R T D L V L F F K M N S - - -       | 234 |
| CRuMs_Rigifilia[seq_7]ATG5                             | 238 | V A W L E N L A H P D N F L H I V L R P Q O L E   | 262 |



[illegible]





Rhizaria\_Amonites1seq\_50|ATG16  
Rhizaria\_Globobulimina1seq\_52|ATG16  
Rhizaria\_Globobulimina1seq\_51|ATG16  
Rhizaria\_Eucyrtidium1seq\_61|ATG16  
Rhizaria\_Bigelowella|A0A6U1DX27|ATG16  
Rhizaria\_Paulinella1seq\_53|ATG16  
Rhizaria\_Palaeomonas|A0M000005-2|13658-16585|ATG16  
Alveolata\_Plasmodium|XP\_001350893|ATG16  
Alveolata\_Vitellina|CEM27357|ATG16  
Alveolata\_Chromera1seq\_6|ATG16  
Alveolata\_Chromera|A0A0G4EZ71|ATG16  
Alveolata\_Oxyrhiza|A0A6V3VN06|ATG16  
Alveolata\_Karenia|A0A6T4VB16|ATG16  
Alveolata\_Tetrahymena1seq\_7|ATG16  
Stramenopiles\_Phytothorales1seq\_54|ATG16  
Stramenopiles\_Phytothorales1seq\_1|ATG16  
Stramenopiles\_Aureococcus|A0A6S9GLY8|ATG16  
Stramenopiles\_Aurantiochytrium1seq\_1|ATG16  
Telonemia\_SRR7371266|seq\_0|ATG16  
Telonemia\_SRR7371266|seq\_60|ATG16  
Centrohelidia\_Raineriophrys1seq\_16|ATG16  
Centrohelidia\_Raphidiophrys1seq\_17|ATG16  
Centrohelidia\_Choanocystis1seq\_15|ATG16  
Centrohelidia\_Acanthocystis1seq\_14|ATG16  
Cryptista\_Guillardia|A0A6U6DUJ1|ATG16  
Cryptista\_Rhodomonas\_31|ATG16  
Cryptista\_Rhodomonas|A0A6U4W9|ATG16  
Cryptista\_Goniomonas1seq\_21|ATG16  
Cryptista\_Palatomonas1seq\_22|ATG16  
Glaucophyta\_Gloeochaete|A0A6T0X249|ATG16  
Chlorophyta\_Ostreococcus|XP\_003082300\_2|ATG16  
Chlorophyta\_Lobomonas1seq\_19|ATG16  
Chlorophyta\_Lobosphaera1seq\_18|ATG16  
Chlorophyta\_Chlamydomonas1seq\_PNW83451|ATG16  
Chlorophyta\_Aradipops1seq|AB09394\_1|ATG16  
Chlorophyta\_Crya1seq\_31|ATG16  
Chlorophyta\_Marchantia|OAE30304\_1|ATG16  
Ancoracysta\_Ancoracysta1seq\_10|ATG16  
Hemistastophora\_Spironemalis1seq\_35|ATG16  
Ancoromonada1seq\_55|ATG16  
Malawimonadida\_Malawimonas1seq\_44|ATG16  
Metamonada\_Tritrichomonas|A0A1J4JQ14|ATG16  
Metamonada\_Tritrichomonas|A0A1J4K1G6|ATG16  
Metamonada\_Tritrichomonas|A0A1J4J3W9|ATG16  
Metamonada\_Tritrichomonas|OH707110\_1|ATG16  
Metamonada\_Tritrichomonas|XP\_011212-1-10691-108462|ATG16  
Metamonada\_Trichomonas|XP\_001318993|ATG16  
Metamonada\_Monocercomonoides1seq\_57|ATG16  
Discoba\_Rhynchopis1seq\_59|ATG16  
Discoba\_Diplonemal1seq\_24|ATG16  
Discoba\_Trypanosoma|T9297\_11\_vs\_1-5-1961-487-1959754|ATG16  
Discoba\_Euglenal1seq\_25|ATG16  
Discoba\_Naegleri1seq\_26|ATG16  
Discoba\_Percolonemal1seq\_A0A6U0M3Q1|ATG16  
Discoba\_Andiculis1seq\_23|ATG16  
Breviata\_Pyruis1seq\_11|ATG16  
Fungi\_Saccharomyces1seq\_34|ATG16  
Fungi\_Komagataella1seq\_32|ATG16  
Fungi\_Schizosaccharomyces|ENP.596308.1|ATG16  
Fungi\_Dactyloleoidem1seq\_5|ATG16  
Fungi\_Gigasporal1seq\_30|ATG16  
Fungi\_Catenari1seq\_29|ATG16  
Fungi\_Piromyces1seq\_33|ATG16  
Fungi\_Gonapodycel1seq\_31|ATG16  
Fungi\_Batrachochytrium1seq\_27|ATG16  
Fungi\_Batrachochytrium1seq\_28|ATG16  
Fungi\_Batrachochytrium|XP\_006675434\_1|ATG16  
Fungi\_Fonticula1seq\_56|ATG16  
Metazoa\_Homo|Q67605|ATG16L1  
Metazoa\_Homo|Q8NA44|ATG16L2  
Metazoa\_Xenopus|KAE8604610\_1|ATG16  
Metazoa\_Xenopus|A0A6B8QBR3|ATG16  
Metazoa\_Xenopus|CAJ82169\_1|ATG16  
Metazoa\_Xenopus|XP\_004919569|ATG16  
Metazoa\_Xenopus|XP\_004919571\_2|ATG16  
Metazoa\_Xenopus|XP\_004919572\_1|ATG16  
Metazoa\_Danio1seq\_47|ATG16  
Metazoa\_Drosophila1seq\_48|ATG16  
Metazoa\_Daphnia|EFX75688\_1|ATG16  
Metazoa\_Caenorhabditis1seq\_45|ATG16  
Metazoa\_Dicymal1seq\_58|ATG16  
Metazoa\_Corticium1seq\_46|ATG16  
Holozoa\_Helgocela1seq\_39|ATG16  
Holozoa\_Stephanocela1seq\_42|ATG16  
Holozoa\_Stephanocela1seq\_43|ATG16  
Holozoa\_Salpingoelma1seq\_41|ATG16  
Holozoa\_Capsasporal1seq\_36|ATG16  
Holozoa\_Ichthyophonus1seq\_40|ATG16  
Holozoa\_Creolimax1seq\_38|ATG16  
Holozoa\_Sphaerothecium1seq\_2|ATG16  
Holozoa\_Coralichthyrium1seq\_37|ATG16  
Amoebozoa\_Entamoeba|A0A5K1UAD5|ATG16  
Amoebozoa\_Entamoeba|IN43|ATG16  
Amoebozoa\_Dictyostelium1seq\_04|ATG16  
Amoebozoa\_Vermamoeba1seq\_08|ATG16  
Amoebozoa\_Acanthamoeba|XP\_003407936\_1|ATG16  
CRuMs\_Mantamonas1seq\_12|ATG16  
CRuMs\_Rizqiella1seq\_13|ATG16

[illegible]

Rhizaria\_Amonia[seq\_50]ATG16  
Rhizaria\_Globobulimina[seq\_52]ATG16  
Rhizaria\_Globobulimina[seq\_51]ATG16  
Rhizaria\_Eucyrtidium[seq\_61]ATG16  
Rhizaria\_Bigelowiella[A0A6U1DX27]ATG16  
Rhizaria\_Paulinella[seq\_53]ATG16  
Alveolata\_Tooplasma[AAQ03000005-2-13658-16585]ATG16  
Alveolata\_Plasmodium[XP\_001350993.1]ATG16  
Alveolata\_Vitrella[CEM27357.1]ATG16  
Alveolata\_Chromera[seq\_61]ATG16  
Alveolata\_Chromera[A0A0G4EZ71]ATG16  
Alveolata\_Oxvrrhis[A0A6V3VN06]ATG16  
Alveolata\_Karenia[A0A6T4VB16]ATG16  
Alveolata\_Tetrahymena[seq\_71]ATG16  
Stramenopiles\_Phytophthora[seq\_54]ATG16  
Stramenopiles\_Personospora[seq\_41]ATG16  
Stramenopiles\_Aureococcus[A0A6S9GYL8]ATG16  
Stramenopiles\_Aurantiochytrium[seq\_11]ATG16  
Telonemia\_SRR7371266[seq\_0]ATG16  
Telonemia\_SRR7371266[seq\_60]ATG16  
Centrohelidia\_Rainenophrys[seq\_16]ATG16  
Centrohelidia\_Raphidophrys[seq\_17]ATG16  
Centrohelidia\_Choanocystis[seq\_15]ATG16  
Centrohelidia\_Acanthocystis[seq\_14]ATG16  
Cryptista\_Guillardia[A0A6U6DUJ1]ATG16  
Cryptista\_Rhodomonas[seq\_31]ATG16  
Cryptista\_Rhodomonas[A0A6U4W919]ATG16  
Cryptista\_Goniomonas[seq\_21]ATG16  
Cryptista\_Palpitomonas[seq\_22]ATG16  
Glaucochyta\_Gloeocetea[A0A6TX0249]ATG16  
Chlorophyta\_Ostreococcus[XP\_00302300.2]ATG16  
Chlorophyta\_Micromonas[seq\_19]ATG16  
Chlorophyta\_Lobosphaera[seq\_18]ATG16  
Chlorophyta\_Chlamydomonas[PNNW3451.1]ATG16  
Chlorophyta\_Arabidopsis[BAB09394.1]ATG16  
Chlorophyta\_Oryza[seq\_20]ATG16  
Chlorophyta\_Marchantia[OE30304.1]ATG16  
Ancoracysta\_Ancoracysta[seq\_10]ATG16  
Hemistagophora\_Spironema[seq\_35]ATG16  
Ancoromonadida\_Nutomonas[seq\_55]ATG16  
Malawimonadida\_Malawimonas[seq\_44]ATG16  
Metamonada\_Tritrichomonas[A0A1J4J144]ATG16  
Metamonada\_Tritrichomonas[A0A1J4K1G6]ATG16  
Metamonada\_Tritrichomonas[A0A1J4J3W9]ATG16  
Metamonada\_Tritrichomonas[OH700110.1]ATG16  
Metamonada\_Trichomonas[DS113312-1-106981-108462]ATG16  
Metamonada\_Trichomonas[XP\_001318993]ATG16  
Metamonada\_Monoceromonoides[seq\_57]ATG16  
Discoba\_Rhynchopis[seq\_21]ATG16  
Discoba\_Diclenemoides[seq\_24]ATG16  
Discoba\_Trypanosoma[T927\_11\_v5.1-5-1961487-1959754]ATG16  
Discoba\_Euglenia[seq\_25]ATG16  
Discoba\_Naegleria[seq\_26]ATG16  
Discoba\_Percollomonas[A0A6U0M3Q1]ATG16  
Discoba\_Andalucia[seq\_23]ATG16  
Breviata\_Pygusul[seq\_11]ATG16  
Fungi\_Saccharomyces[seq\_34]ATG16  
Fungi\_Komagataella[seq\_32]ATG16  
Fungi\_Schizosaccharomyces[NP\_596308.1]ATG16  
Fungi\_Claridiales[seq\_51]ATG16  
Fungi\_Gigasporae[seq\_30]ATG16  
Fungi\_Catenaria[seq\_29]ATG16  
Fungi\_Piromyces[seq\_33]ATG16  
Fungi\_Gonapodya[seq\_31]ATG16  
Fungi\_Batrachochytrium[seq\_27]ATG16  
Fungi\_Batrachochytrium[seq\_28]ATG16  
Fungi\_Batrachochytrium[XP\_006675434.1]ATG16  
Fungi\_Forticul[seq\_56]ATG16  
Metazoa\_Homo[Q676U5]ATG16L1  
Metazoa\_Homo[Q8NA4A]ATG16L2  
Metazoa\_Xenopus[KAE8604610.1]ATG16  
Metazoa\_Xenopus[CAJ82169.1]ATG16  
Metazoa\_Xenopus[XP\_004919969.2]ATG16  
Metazoa\_Xenopus[XP\_004919971.2]ATG16  
Metazoa\_Xenopus[seq\_49]ATG16  
Metazoa\_Danio[seq\_47]ATG16  
Metazoa\_Drosophila[seq\_48]ATG16  
Metazoa\_Daphnia[EFX75688.1]ATG16  
Metazoa\_Caenorhabditis[seq\_45]ATG16  
Metazoa\_Dicymela[seq\_58]ATG16  
Metazoa\_Corticium[seq\_46]ATG16  
Holozoa\_Helgocael[seq\_39]ATG16  
Holozoa\_Stephanocael[seq\_43]ATG16  
Holozoa\_Stephanocael[seq\_42]ATG16  
Holozoa\_Salpingocea[seq\_41]ATG16  
Holozoa\_Capasporea[seq\_36]ATG16  
Holozoa\_Ichthyophonus[seq\_40]ATG16  
Holozoa\_Creolimax[seq\_38]ATG16  
Holozoa\_Sphaerothecum[seq\_21]ATG16  
Holozoa\_Carolinichytrium[seq\_37]ATG16  
Amoebozoa\_Entamoeba[A0A5K1UAD5]ATG16  
Amoebozoa\_Entamoeba[B1M4G3]ATG16  
Amoebozoa\_Dictyostelium[seq\_81]ATG16  
Amoebozoa\_Vermamoeba[seq\_91]ATG16  
Amoebozoa\_Acanthamoeba[XP\_004340796.1]ATG16  
CRuMs\_Mantamonas[seq\_12]ATG16  
CRuMs\_Rigifilia[seq\_13]ATG16

305 .....NRAPIVDLYGP..... 315  
363 L I F S G S H D R T I K L W D L E T A A C K Y T M A H S S I N D L T S P D E Y Y L A T A H D G C I R F W G K D R K E L F K L T E P O M O I N G I O F S P D G I Q I L T S G O K G I I I W D L R K Q O K L N E I F N K E Y K N T N I L T G 483  
363 L I F S G S H D R T I K L W D L E T A A C K Y T M A H S S I N D L T S P D E Y Y L A T A H D G C I R F W G K D R K E L F K L T E P O M O I N G I O F S P D G I Q I L T S G O K G I I I W D L R K Q O K L N E I F N K E Y K N T N I L T G 483  
191 T V T Y G S Y D R A K I W D L N K E I N T R I V M S S I N C L A I S D M S I V A T A H L S A V R F W S G D E L Y T H K ..... E L S S Q A Q V D F A R D Q T V L V N S I T S G I Q L D L R T F I L K K I S B ..... H T N T C S W A 306  
357 Q A Y T G S Y D R T I V I W D M T K R K S H I D G S A V N Y L S W A G N I L G A H L S R V L W S S G D E Y Y T H K I T R O A S I E F G D G H A V N S K O N T Q L I D I T T Y N S I K V F K D I T R S H M N N 477  
360 H V Y T G S H D R T V K I W D L S T G C O T K I M A S A O G C L T S I S V G C V L S A H I S H S V R M S M A T E L W R K O K L S Q Q V S V D W A S D G R T I L N S K S I L K L D V T R M A V S G S A B R K R N G N 490  
364 S W S C L D E T V L W D A R R S A D V K T S L D A A T M T S A S P D E W L A I S H O N S L V L N V A E K C E R V A L Q L T E A A G A V A D P S G R L A L C G O K Q K V V D I A M K E M T L H I E R Y N I V O A 484  
Alveolata\_Plasmodium[XP\_001350993.1]ATG16  
243 .....KELKKLYOEIT..... 254  
347 K A Y S A S A D K T I K I W N I H R S V Q V K T A H I S M I T C A S I H P S D C L V T G R D G H I K I W T L R G D D C Q O S M O A H E D E L V G T E Y S P D G E Y I V S C A K N S V H S N D M F R V R K O L G E P G G R S Y R K R 467  
257 L L F T A L D D R T Q L W D F N K G S P L H S L S V S K L T S A A V S R D F E T A V T G R N G T V M I L S L R G N K I I E I R D E H T Q E V T G V K I E D M S S F V T Q G E D N T V K W D L A Q R V E L S V P L D E W N F A V G H A 377  
327 L L F T A L D D R T Q L W D F N K G S P L H S L S V S K L T S A A V S R D F E T A V T G R N G T V M I L S L R G N K I I E I R D E H T Q E V T G V K I E D M S S F V T Q G E D N T V K W D L A Q R V E L S V P L D E W N F A V G H A 447  
327 K G S A G F A O R T I V K I W D L R G R N V R S I S C P Q V L H A S S E D G A F L A T C H O N G H A V M A N S E M G O M L G A V H D P A V G V H F A D G R C I A S F C G R S R V L L S D T M T S L R V M S G S M R P P P V T S 447  
279 K A F T A S M K T V R L W D L E K C O L L K S T P I S S P I T G A S V Q A S S C V V T V T G S G S I S V L D P P E R A R M O O P I V H V G O G I V G L R V P P G R S V L G A O E D T L C I L A L D T L R T H T L D S L G O L V S G S 398  
360 K V V S G S T D R S L K I W D I N K V S Q I K S I L C G S I M R A I D I F O S E P I V S G H D G S I R L S I D S N N Y N V G V F E N V G V K I N C O N Y I L A S S E G F T K L V V D L R K N V G S I T P N Q O F N N H F N 480  
329 E V I T G S S D R S L R W D V L R V R L Q V G V S S O R D I A A S G F V O P A S A P O D G A V R F M T T R C V O E L R L H T E C Q S V S F ..... G S E L L I N S R H T K L V I D P T Y B V L R E L H H K D C O C F P M G 447  
209 V L V T A A T D R F V K P V N R A S O T M P A P G C L A D L D P L S D D L V T G H G A L R W B A S P D V A L E I K D A H C A V A S A V A D G R T S O L A S L A K H T R L F V D A T S R L H A L S H D N R C G A A R C 328  
169 Y ..... A A G G R K I I W D V S S S N V R V D M S K C L A L D N E Q G T L L V S G H V B K G R L W D M T B E R A G V T A L H T N P L S V S F K L G - D I V T A A M N R L A I L D O R K L B E P R Y L S D R E F R A N Q W C 286  
116 H V F S T S T D R T V R W D V A R E Q L T N T I M C L S G C N D V R V ..... N D K V A T G H G O G M R L Y D S R O C K E A G V R - M O K P I T S L R F S Q D G F A L T S K O N T I K V C D V R T L N P L Y E L T H P N L S V S N I Q 233  
361 N A V T G S H D R T V K I W D L G T K C L O L T I G A S M I N D V A P P D G M H V S G H Y G S I R F N D P T K E E L A K L E - M A G H V T S V C Y T P C G T K L V S C R D S S L K I D I R M F G E L C T M K D D S Y R T L S N S 480  
360 R V V S G S C D R T I K O W L S R G Y C T R I L L C I S S N S V C P D R S G F M V A S G H F K S V K L W D V D R E V K O I E D L H T Q O V H F E P S G R H L I N G R O N V L K I D V R M M O T I N T M T H P E L Y V P L T Y S 470  
354 R V V S G S C D R T I K W D L N R G Y C T R I L L C I S S N S V S R D T B A M V A S G H F K T L R W D V D G T E I K V D D A S Q O V A H F A P D G H F I M S C S K S I K I D A Y T E T V O L G H K S H K L O I K W A 474  
347 R V V S G S C D R T I K O W L R G Y C T R I L L C I S S N S V A D A A G Y L V A S G H F K S V K L W D V S E K E Y K I E N L A A O I V A F D P S G R H L I L G E S T K L I T A D T Y E T V I G H R D L Q V A V N T 467  
Alveolata\_Plasmodium[XP\_001350993.1]ATG16  
355 Y A F S G G Y D M I K W D L H E L L V S K I T A G S S S C N A V T V S S V I V S V L N S I R L W D T I T S E F E H M T I G S Q P I T S I C P S M S D M N S R O S A L S D F K Y S C V R K F O H S T I R N G V M N N 477  
149 B L Y S G G Y D M I K W D V S L S E T L H S Y N C S S C D A T M S E G A V L M S V H L B A S L R W D L T R T G A F A H E V A G M T O P V S C H N E A N Q O V L N G R D O C L V D Y R K Y D C V R K H A B X N G V M N N 269  
360 Q V I S G S Y D R T I R W E L S K Y G I K T L F T S I S I N D L C S P D S S V L C S V H L D F H L R F W D F S G T V O H E V S - V H S H P I T S V S L Y P A N V Y V T L G R D D V L K L V D V T Y Q A V A R S D S F H H G T Y A 479  
359 R I V T A G A D R K M V Y L G K G N C V L L H P S T O N A L A I T T - D N O L I T G H F D G G L R W D L S G E V V M E K H T A A I T O E A S P D M T G V T G T G O D F V T V T D V R M E K K M A S M T S F K N T Y A F T 478  
359 R M V S G S Y D R S V K L W I A K G Y O V K M L C I S S N S V D S S I T I S G H V D G L R F D A S S A L E H I S D M T S O I G H L H V D G H V L A L S R O N T K L I D T R T Y A T M T F D E B F R V G T M N 479  
340 R A I S A S D R T L K I W D L V R G L A T T M L A T I A S H L S I G A T E R H A F S G H F D G S R W D L I A N Q V E K E N K - V H A G P I S I V A V S E N E V L L N S R O N K L K L V D V M H E V V R N S S K P F R V G T M S 459  
364 R A V S A S D R T I K W D L H K F O V A S I M A S A I A S E S S I S I S H F G A C R W D L O K R G S H E V K - E H A C H V S V L V A P K S H F M C A S R O N T K L V O L P E C Q O T K A T A R S S O W A 483  
220 R A V S A G N D R L K W D L R G Y C T R I V C A R T O N S R L R C T G D A M F C S G F D G T L R W D M S N P V H V A G L S G O I S V A V M G S G E T L C S R O N T K L V D M F E E R H T R A P F V G V T I W C 340  
364 L A V S I S G R V W S P D R K Y G N G - S V L G A A G A A A A G T D D V Y L R L Y A G A R I S D S M A V A N - I V D F A A A D A L W R N P S I A F I A A G N S S A K V L N V A A D T W A Y L R T G V T I G A A A 482  
323 H V F S T S T D R T V R W D V A R E Q L T N T I M C L S G C N D V R V ..... N D K V A T G H G O G M R L Y D S R O C K E A G V R - M O K P I T S L R F S Q D G F A L T S K O N T I K V C D V R T L N P L Y E L T H P N L S V S N I Q 233  
322 V L A S S N D H I K I W D L S G F O K S I M S G N A N S L A F I - D G V T L C S G H R G H L R W D I S A K C O S I F - A H - L D V S S V S R N R N F L I S G C O N V N I F D P R T M E V G C K F A M G N R V S W S G 438  
319 R A V A S Y D R T I K W D L G T G Y G V N T I V C Y S N S V C V T S D G A L I C S G H G O G L R F W D I S G K L A N E V A - A H G L G I S V S L S R T H T V L S G R A N I N F D V S L E I R A T R S R N F R A A T N W C 439  
355 H V M T G S S D R T I K W D L M T G Y C L O T V I G C I S C N S V A L S D N Q L M S G H F C T V R L T A S K E E V Q T L S N L T Q O V N V R F S P D G T Y L L A S R S T K L V D I T F O T Y L S H E K K N I M W S 475  
346 H V I T G G H D R V K I W D L N K Y G V T N L F T E N C I A C L S I D B L V T S G H M G N L R W D I T E K L L S E V A - G S S A V S S V L R N R N R I L S G G N V N D V F D T T L E I C G T R A S G N R L A S H N S 442  
156 T C F T G S D R T L K W D L K D F N K L Y I C M G S Y D L A L S D C G T I M S G H G L R F M S T I R T D - I O E G A P V D O I C R L R S I T R L L V L S R O N K M L I F D T M A S L P M T H S D F S V M C S W S 275  
364 R A V S A S D R T I K W D L H K F O V A S I M A S A I A S E S S I S I S H F G A C R W D L O K R G S H E V K - E H A C H V S V L V A P K S H F M C A S R O N T K L V O L P E C Q O T K A T A R S S O W A 483  
322 K Y S G S R D L L K L V D Y T K T R I N T F K K A T P R Y V I T L D S L E I T A H A D G H L W D I S N S O I G I - V K R D K V S O V I G I R S M T V S L S I D K T I S V S D Y R V N L G K N I A T T A - G I R S D 439  
290 O F I A C S N E R K I K Y D I D R L K L S L K A S T A P L Y T I L N K S Y L A S S A D G R V C L W D S E H T P I Q T I K - E N S S R I Q V L G I - N D S L I V S L M O C N L F I D K S G A K I I E K I L K L A - S V N S E 406  
319 R V V S C C R D T V L V D Y N K S T I S S F T S S I R Y S T V L - G S O I V T S H D G K L R W D F T H G A P I I K - V H K S A I Q V I G R O S T L V S L G T D K A I V S D W S G K I I G K V S I L K S - B L R S E 434  
299 Q L I S A S D R T V I F D I N K G S M S T I S I I A V A Y S C A T N S T P F A V G C N D G A I L V D T R E K K I A K I E K I S K O I S L I P S T A K R I V L S L G M D C V C E S I D G R V R I Q L S H L V V K N H A 419  
267 Q L L S A S D R T V I F D I N K L A C I T I I S S E Y S T P T A N N L V A G C F E K I R F I D P R K I V A N T I D - L K S G A V L S I I P S I T G D V I S L G L G M D C V C E S I D G R V R I Q L S H L V V K N H A 419  
314 K F V T C G R N S I L F D I Q R S A P N T I S S T P N S I P L O G E S L V T G H Y G G Y I R G Y L D S S Q H V F I K - B K Q P I Q V C G R O A S K I M S I S C K T I A S I D L K E T S V S W F N H R A - B L R S E 431  
298 T V S S T D K R I I W D I N K A E P O V S Y G C G Y A L S A T - H E T I Y S G T E G A I K W D R A S S S I G E I O N C H E S T I V L G S P D R Y L L V A R G S S S V A D F P M L T M C K W F S P M S T Q N T 417  
327 L L C S A S D R T I K W D L N K Y G V T N L F T E N C I A C L S I D B L V T S G H M G N L R W D I T E K L L S E V A - G S S A V S S V L R N R N R I L S G G N V N D V F D T T L E I C G T R A S G N R L A S H N S 442  
331 T L I C A N R T I R W D L N K Y G V T N L F T E N C I A C L S I D B L V T S G H M G N L R W D I T E K L L S E V A - G S S A V S S V L R N R N R I L S G G N V N D V F D T T L E I C G T R A S G N R L A S H N S 442  
331 N A V S A S D R T I R W D L Q S A T I O K L L V F S C C D L C V A - D S H L S A H Y S I C W D S G R N P D E K N V H P C G A C R V R V N - N C L V S L G C A G I S V R D T R M A L F R E R E D I S T S H L A 448  
367 V V Y T A A H D R T V W D L S G R C V K T A L C G S C N D L A V H P C S D I M C T A H L S B Q L K W D P T Y V T V V H S I E A D F A R Q V S V L T P S S S V L A S G R G G V L K I F D L T Y E A L H T G K D M V A S I N H Y 478  
361 K V Y T A A H D R T I K P V E L Q Y G T O E K I T O C S S N D V S E Y S R O T I A S A H F D S A V R W D M S K F L I S E I A R A O F S V S V S F C G D L L S N G O N L N I Y D L M Q V N T L K H D T K N T I A Y N 480  
356 R V V T G S H D R M I W D I S R G A L I K I V O R S T N D L E I S K P S N L I V S A H F N S I R I H O L S K C L V T L E K N H T Q O V S V N I S R D G K Y V L S M G R H S L R W D L N F K Q Y V Y F T N S A F K N Q L N M 476  
358 R A V S G S D R T I K W D L N K G F S I R T L C L S C N D V D F V G D N S V S A H F D G S V R F M D A S S E S V Y I E E L L E G P V S V O I S D D G Q L V L S N G R O N V L R L S D V M H S T L O A R T E S Y R N L N N W 478  
327 R V V T A S D R T V W ..... 340  
.....A..... 52  
52 .....A..... 53  
361 K V I T G S H D R T I K W D L O K Y G I R T I F F S C N D V R L D E G T I V S G H L N N R F W D V S G K I E L T G I L G O I S V S P D S G S K V L I N S R O N T K L V D L R T Y D V E Q T H A D B Y K T G A N M S 470  
363 V L S Y S G A D R T I K W D M A R K Y C A K L M A F A C M D V A I G S A A T L V S A H L O G K V R W D S S G G A G E V V A R B E G C V S K V - L D P S T I V L A R D N A I R I D L S Q T I W N S I H S S F F R I G - N T 480  
313 N I S C C O R T I K I W N I S G S C O T S I F H S C N D V L D M S G N V V T A H L D N S L I W D M H N K K L I O E I T I S S P V I S K T P E N E I L S L S R O N S K L I D I R M Y N T L F R D D N L R T F N N S Q 433  
359 R I I S G S H D R T I K W D M S G I C T R T A F I F S C N D V L D Q G S M A G L D N N V R I W D M S V N I R E I T G L S D R V T G V T V P O R T H L I T C R O N S L R L I D R T F O L V N S T S D K P R V S W S 479  
324 R I V S G S H D R T I K W D L V K G Y I R T L F L S C N D L A L D E G O I I S G H L N N V R I W D A T G N N I R E I T G I S G O V S E V S P N Q H E L T S R H T L O L L D V T Y T I I A T I A D G Y R V G M N N A 394  
257 .....N..... 257  
360 R I V S G S H D R T I K W D L V K G Y I R T L F L S C N D L A L D E G O I I S G H L N N V R I W D A T G N N I R E I T G I S G O V S E V S P N Q H E L T S R H T L O L L D V T Y T I I A T I ..... A B W A M A 475  
297 R A V S A S D R S I R W D M T G Y S Q V V I L A S M N D V L M S A T L I S A C S H S F S D P T S H R N V T I L N V A T O N S G L Y S P Y Q V L V A S R O N T K L I D R T K L A S M A T K A P A R S T S S Y T 417  
362 R I V S G S H D R T L K W D L R S K V G I K I V F A G S C N D I V C T - E C C V M S G H F D K K I R F W D I T E C I V R E L E - L - G K I A L D N P E R T Q L L S C R D L K V I D R T N A I K O T S A P O F K C S D W T 478  
362 Q A V T G S R D R T V E W D L G R A Y C S R I N V L S Y C N D V C G - D H I I I S G H N Q K I R F W D S G R G H Q V I P V - O G R V I S L N S H Q L L S C R D T K V I D R V S N I R O V F R A D G F K C S D W T 478  
362 R I V S G S H D R T L K W D L R S K V G I K I V F A G S C N D I V C T - E C C V M S G H F D K K I R F W D I T E C I V R E L E - L - G R I A L D N P E R T Q L L S C R D L K I I T O R A N A V Q O T F A P G F K C S D W T 478  
362 R I V S G S H D R T L K W D L R S K V G I K I V F A G S C N D I V C T - E C C V M S G H F D K K I R F W D I T E C I V R E L E - L - G R I A L D N P E R T Q L L S C R D L K I I T O R A N A V Q O T F A P G F K C S D W T 458  
362 R I V S G S H D R T L K W D L R S K V G I K I V F A G S C N D I V C T - E C C V M S G H F D K K I R F W D I T E C I V R E L E - L - G R I A L D N P E R T Q L L S C R D L K I I T O R A N A V Q O T F A P G F K C S D W T 478  
348 R A V T C L D R T I R E W D L Q K A A D I R R I V S Y S G S D V S G - D Y M I S G H P K K I R F W D S S E S C F R E V T - L E E K I S L F M D O C G O L L S C R D A L S L F D L S S N V R O V F R A D G F K C S D W T 464  
348 R A V T C L D R T I R E W D L Q K A A D I R R I V S Y S G S D V S G - D Y M I S G H P K K I R F W D S S E S C F R E V T - L E E K I S L F M D O C G O L L S C R D A L S L F D L S S N V R O V F R A D G F K C S D W T 464  
344 R I V S G S H D R T L K W D L R S K V G I K I V F A G S C N D I V C T - E C C V M S G H F D K K I R F W D I T E C I V R E L E - L - G R I A L D N P E R T Q L L S C R D L K I I T O R A N A V Q O T F A P G F K C S D W T 460  
359 R I V S G S Y D R T L K W D L R S K V G I K I V F A G S C N D I V C T - E C C V M S G H F D K K I R F W D I T E C I V R E L E - L - M R V S I D L N H R T E L L S C R D L K I I D R T N A V R O T F A P G F K C S D F T 475  
364 K V V T G S H D R T L K W D L R S I A C I E K I V A S G H L V I T D L S G I T I S G Y D K K I R F W D I T E A S Q A D V L L - M A K I S L S D L K C N Y L I C S V D R T K L L D R K N V I S T E N H E K I S C D F A 472  
327 .....N..... 327  
326 S A V S G S A D R V K I I W D I O N O R C S R S L F A S K V L D V A I N M S P L F A S G H F D K K L R F Y D G S T D P V R T V D - M - G G R I T S L D V I M S G C E L L V S T R O O T I S L I D R T F Q T V H C S A E N V R T S S D L S 444  
327 R V V S G - C R I I K L L D V R K S Q N I Y L F A G S T V I D L L A V - D S S V I S T H F D K S V R W D T R E K S A L S D C I L D O E K I T G A D I F S E S H V - I C S L D G R S L V N D R A N V T V M V G S A D D V D F V Y S 443  
354 R V V T G S H D R T L K W D L R S K V G I K I V F A G S C N D V S D A B A C I S G H F D K K I R F W D I T S D A S A N E I S - L - G K V I S L D S P O R T L L S S R O O T L K I D R M N Q V I G T R Y ..... 462  
355 T V T A S R D R T I K A F D I K R E V I K E N A L A D T O A L C A I A - D A Y O L V A H F B K T I K I R F E D O L G Y S E S S A H I I C A P I S N K V L A A Q H T R L E D L M H S T V O T E M H D D R L G S C 474  
359 N M S A S K D H I K W D I K R S K A S A L O D T G T W G ..... V K E F L - R V A S A L A E H E V R - D L V W R H T V I V T L E S C I I A N S F H T Y S ..... 447  
363 R V V T G S H D R T I K W D L R S K V G I K I V F A G S C N D I V C T - T A T W L V A H A K T L N R P W D T A D I N K L G I A T E N T T I I M A C S P D D V A L L A S H R N L R V D T L T H R V R G S V S A H A A T T 478  
349 R V V S A S O R T I K I W S L S R G V E R I I M I T G F D I V A V - D H R F F I C H F D K R L E F D S A L D R I A L S L P A R Q A L C L V D S H N S L I A T S N E V C V I D R I S L E K V K T W R S - D B V G G C G 467  
364 K V I S G S H D R T I K W D L A K G Y C I K I F F S C N D I I G S D T A L V S G H V N H I R F W D S T G D C S I T G I T G O I S L A V T R R V L V S R O N T M K L D V M L Q V N T L F H D S Y R N G V M N S 484  
358 T G F S S S D R T L K W D L K R G N I I H T F N P K S C H D V L I D T G I S T I S G Y A D G H L R V S G S K Q C S Q I V N V S T A I S L D L T N R T M I L T S G R O N S K M M D I M S N K V ..... 463  
11 K I T A S H D R T L K W D L O K Y C Y T R I M F G A S S N V V F T D S G A I S A S D G C V R F W D V A D C I Y O M K G T S A S V C N I V L T S R T Q L I T S K O N T K L I D R N F F V L S T F C H P N F S C L I T S 231  
35 R V V S A S H O R T I R W D L H R G O A S S V F M A T G R D I A I T D D R V I G G Y G K L R L Y D F A D S O M K V - L H M T A I G S D G R N R V E I G O K I L H V V D V N D O K L F E M S H P O T I S H L A 474  
312 K I M T G S H D R T L K W D I N K Y G L K T I F F S C N D I V S G H M G N L V L F D G C N T I R F W D I S C D I N K N I T S S V A D I I N V L G R F V S I G O K I L H V V D V N D O K L F E M S H P O T I S S S 431  
312 T V T G S T D R L R W D M A H S R O K L S I S V S G S L T M - R N Q A V T I S S I R F M N O K I R F W D V N V F E I A C S V D G A E Y L L N G O N T I M M O F F M R V O K F N D O N I N ..... 428  
363 R V V T G S H D R T I K W D L R S K V G I K I V F A G S C N D I V C T - T A T W L V A H A K T L N R P W D T A D I N K L G I A T E N T T I I M A C S P D D V A L L A S H R N L R V D T L T H R V R G S V S A H A A T T 478  
363 R V V T A S H O R T L K W D L S K Y C I R T L F O F S A N A V A L S Y D N S I A S H L S H L R I W D M N E P I R M D N L S Q O I S S P A D G R T V L I N S R O N T K L I D R T N E E V V T L K H D S Y R N G V N A 483  
331 K I T G S O R T V K W D L G K Y G V S P N A V S E S T R M L C S A H A D R R V R W D L T A D P V A I I D V O S K A S I S W S P A W E L V L T A P D N T A Q L D I T W O K S A H T ..... R G V L S 446  
357 R V V S G S H D R T I K W D L S G F O K S I T I A F S S V N D M A L N G P A T A F S G H F N H V R W D L T A D P C H M D E G S A O V S S I T I N T N T L L N C D N V R L D V R M M V N S E F K D Q A F I N S N S I 477



Rhizaria\_Ammonia[seq\_50]ATG16  
Rhizaria\_Globobulimina[seq\_52]ATG16  
Rhizaria\_Globobulimina[seq\_51]ATG16  
Rhizaria\_Eucyrtidium[seq\_61]ATG16  
Rhizaria\_Bigelowiella[AOA6U1DX27]ATG16  
Rhizaria\_Paulinella[seq\_53]ATG16  
Alveolata\_Toxoplasma[AAQM03000005-2-13658-16585]ATG16  
Alveolata\_Plasmodium[XP\_001350893.1]ATG16  
Alveolata\_Vitrella[CEM27357.1]ATG16  
Alveolata\_Chromera[seq\_61A]TG16  
Alveolata\_Chromera[AOA0G4EZ71]ATG16  
Alveolata\_Oxyrrhis[AOA6V3VN06]ATG16  
Alveolata\_Karenia[AOA6T4VB16]ATG16  
Alveolata\_Tetrahymena[seq\_71A]TG16  
Stramenopiles\_Phycopithorax[seq\_54A]ATG16  
Stramenopiles\_Personospora[seq\_4]ATG16  
Stramenopiles\_Gleococcyus[AOA6S9GYL8]ATG16  
Stramenopiles\_Aurantiochytrium[seq\_71A]TG16  
Telonemia\_SRR737126[seq\_0]ATG16  
Telonemia\_SRR737126[seq\_60]ATG16  
Centrohelida\_Rainenophrys[seq\_16]ATG16  
Centrohelida\_Raphidiophrys[seq\_17]ATG16  
Centrohelida\_Choanocystis[seq\_13]ATG16  
Centrohelida\_Acanthocystis[seq\_14]ATG16  
Cryptista\_Guillardia[AOA6U6DUJ1]ATG16  
Cryptista\_Rhodomonas[seq\_22]ATG16  
Cryptista\_Rhodomonas[AOA6U4W9]ATG16  
Cryptista\_Goniomonas[seq\_21]ATG16  
Cryptista\_Palptonomonas[seq\_22]ATG16  
Glaucoophyta\_Gleococcyus[AOA6T0X249]ATG16  
Chlorophyta\_Ostreococcus[XP\_00302300.2]ATG16  
Chlorophyta\_Micromonas[seq\_19]ATG16  
Chlorophyta\_Lobosphaera[seq\_18]ATG16  
Chlorophyta\_Chlamydomonas[PINW83451.1]ATG16  
Chlorophyta\_Arabidopsis[BAB09394.1]ATG16  
Chlorophyta\_Oryza[seq\_20]ATG16  
Chlorophyta\_Marchantia[OAE30304.1]ATG16  
Ancoracysta\_Ancoracysta[seq\_10]ATG16  
Hemimastigophora\_Spironema[seq\_35]ATG16  
Hemimastigophora\_Spironema[seq\_35]ATG16  
Malawimonadida\_Malawimonas[seq\_44]ATG16  
Metamonada\_Tritrichomonas[AOA1J4JQ14]ATG16  
Metamonada\_Tritrichomonas[AOA1J4JQ14]ATG16  
Metamonada\_Tritrichomonas[AOA1J4JQ14]ATG16  
Metamonada\_Tritrichomonas[AOA1J4JQ14]ATG16  
Metamonada\_Tritrichomonas[OH700110.1]ATG16  
Metamonada\_Tritrichomonas[D5113312-1-106981-108462]ATG16  
Metamonada\_Tritrichomonas[XP\_001318993]ATG16  
Metamonada\_Monocercomonoides[seq\_57]ATG16  
Discoba\_Rhynchopus[seq\_59]ATG16  
Discoba\_Diplonemias[seq\_44]ATG16  
Discoba\_Trypanosoma[Tb927\_11\_v5.1-1961487-1959754]ATG16  
Discoba\_Euglenas[seq\_25]ATG16  
Discoba\_Naegleria[seq\_26]ATG16  
Discoba\_Percomonas[AOA6U0M3Q1]ATG16  
Discoba\_Aldicula[seq\_23]ATG16  
Breviata\_Pygus[seq\_11]ATG16  
Fungi\_Saccharomyces[seq\_34]ATG16  
Fungi\_Komagataella[seq\_32]ATG16  
Fungi\_Schizosaccharomyces[MP\_596308.1]ATG16  
Fungi\_Claridoglossum[seq\_5]ATG16  
Fungi\_Gigasporas[seq\_30]ATG16  
Fungi\_Catenaria[seq\_29]ATG16  
Fungi\_Piromyces[seq\_33]ATG16  
Fungi\_Gonapodydse[seq\_31]ATG16  
Fungi\_Batrachochytrium[seq\_27]ATG16  
Fungi\_Batrachochytrium[seq\_28]ATG16  
Fungi\_Batrachochytrium[XP\_006675434.1]ATG16  
Fungi\_Forticulus[seq\_56]ATG16  
Metazoa\_Homo[Q676U5]ATG16L1  
Metazoa\_Homo[Q8NAA4]ATG16L2  
Metazoa\_Xenopus[KA8604610.1]ATG16  
Metazoa\_Xenopus[AOA6I8QBR3]ATG16  
Metazoa\_Xenopus[CAJ82169.1]ATG16  
Metazoa\_Xenopus[XP\_004919969.2]ATG16  
Metazoa\_Xenopus[XP\_004919971.2]ATG16  
Metazoa\_Xenopus[seq\_49]ATG16  
Metazoa\_Danio[seq\_47]ATG16  
Metazoa\_Drosophila[seq\_48]ATG16  
Metazoa\_Daphnia[EFX75688.1]ATG16  
Metazoa\_Caenorhabditis[seq\_45]ATG16  
Metazoa\_Dicymela[seq\_58]ATG16  
Metazoa\_Corticium[seq\_46]ATG16  
Holozoa\_Helgocaela[seq\_39]ATG16  
Holozoa\_Stephanocaela[seq\_42]ATG16  
Holozoa\_Stephanocaela[seq\_43]ATG16  
Holozoa\_Salpinoecaela[seq\_41]ATG16  
Holozoa\_Capsasporas[seq\_36]ATG16  
Holozoa\_Ichthyophonus[seq\_40]ATG16  
Holozoa\_Creolimax[seq\_38]ATG16  
Holozoa\_Sphaerothecum[seq\_2]ATG16  
Holozoa\_Coralochytrium[seq\_37]ATG16  
Amoebozoa\_Entamoeba[AOA5U1UAD5]ATG16  
Amoebozoa\_Entamoeba[PINW83451.1]ATG16  
Amoebozoa\_Dictyostelium[seq\_5]ATG16  
Amoebozoa\_Vermamoeba[seq\_9]ATG16  
Amoebozoa\_Acanthamoeba[XP\_004340796.1]ATG16  
CRuMs\_Mantamonas[seq\_12]ATG16  
CRuMs\_Rigifolia[seq\_13]ATG16

316-----LNFNITPPOLKSKMWOAHSSDVCALLHFDOTGKKLIS-----G  
484KPCYSPDGOVITIGGSSKYSLF IWKTKTSKLOHTLT-EH TSQISKV IWHGRG-GVASSDRSGVMAMWC  
484KPCYSPDGOVITIGGSSKYSLF IWKTKTSKLOHTLT-EH TSQISKV IWHGRG-GVASSDRSGVMAMWC  
307IAOFADGRVCVAGSTNOE VV IWDCKTGKVEKRFY-EHES I VFWWKE-----MLATSDRKGNK I K VFS  
478NATFSDGRKVVVAGSSNSELFWSSVKTEKLEKRLKRLNANITCWKISPNKHWACDNAGYVVLWD  
481IAVFPDGRPLVVAAGSASBELFWOTSSKLLTTTIAADAAHILSLDINBNKQI IATQTGMLTFFI  
485BVEBBDGAFVAAA-AGPHVYKMTIRKCGDDVLLR-SQMTDVTCLSWQLHR-GLVCGGKDSVMWLA  
255-----NKQKKYIL-----FKNNOFYNNLYF  
468AVVMSPGSAWIVSPMGDGLVFWNALSGOYATRKVPSEVOVTSLTWRF-G-KLITAHRRSGIVFWT  
378CAD IAPDGLLVIPHKEGIL-CYNRLKKKEESSIS-LR-EMPLALEWTFPG--VVS GSKEGRLTFWT  
448CAD IAPDGLLVIPHKEGIL-CYNRLKKKEESSIS-LR-EMPLALEWTFPG--VVS GSKEGRLTFWT  
448VPVFPSPDAS IAVVC-CGRS IHOWEAISGDAHKPFE--LSTVLALSWSL--ELVAAQDGHV-FWK  
399AFAFSSDSAHV IARGAN-SIGOWNASTGACVCLHE-EQOQPI-SVOWDFH--MALSIHODGHAAALWS  
481KCCFSPDGV I IAGSSDSS IIMFNFKDGTGKSVLKNKPSV I VANDH I NVGSNLVS GDSRNL I IWN  
448IASLSPDGRVALAGASBLF IWSARTKLERQKPGHAAVACWWRPDCGVASCDKNGVVVLWE  
256KCMSPDGGVVAAGSADGSQV IWSVANAK I VSTLK-ENTSPVLSCAVSNLKKPLATSDKNGN I C IWS  
329KLAYSFGCTVVAAPSSSTGDALVFTDTTGLLAALLABLNTPPVAAVAVSLARTOLATVDKAGALALWD  
287KACVSPGALLAAAGSKTGLSLF IWDNGLSLOR IYSEQ-AH AOP ITCVAVSTPSQOLASVDSSGAI VOWR  
418LALSPDGK YCS TGS TSCVYVWECNAGRVVSTLN-SHAGHSNVAVVSPQKGLAA ISTDKKLVMF  
481KAAVSPNGRVVAAAGHNGSVH IWDLTSLR IAKRLYDAITET I ICSGWSNGQDLAVSDRTGVVCCVS  
471KACLSPDANVCA I GNDGNV VVFDSTTAKLE I I I LKGNHNSY I SSCTVGA I GSC IAI I DKNGMVAWV  
475KCMSPDGRVVAAGHNDGNVFLNVASGEIE I I LKGNHNSY I TACAVSMVQSTLAI I DKNHGRVVMW  
468KACFSPDGNV VVVGQTVGVFVDAHTGHE T V L-KHEFVVSQVSNVSGVVA I I DKNGR I VFW  
264-----L  
476KATSPDGKFLAAGGSDSGIFWEAEENLVSQIRNVRSVAVAGSWASN-DOLASIEKEHOMV IWE  
270KATSPDGKFLVVAAGGCGDSIT I I WNAETTE I VDTLRGHHKSPVVSQWGN-DLFASAEKEHRLM IWE  
216-----KG-----GGEEEDVE  
480KAT I SPDGOV I IAGSSSGSVH I WEMOSAKEVAVLA-GHKGPVSCSGV I AN-DOLASCDKDRK I I IWE  
479GCGFSPNGAV I IACGGANGNVYAFDVKKSSCAVVGQGGKGMVTAALVTDGENVVTS GSKDKS I VFW  
479KCMSPDNSVVAAGSTG I V I V IWSA I NGKLKATLRGCTHGVVCGAWSSRG-QLAS I SKDRVALVW  
460NFCALPDCG I I IAGGSDGGLF IWRVQDGRMLTTLH-GDAVAVSGVSSSG-MLASADKNBVLCLWE  
484NFCVSPGSGSVVAGSADGVFWSVHDSITTLER-ADAAVATEH I GORE-LATADKNB I AVLVA  
341TACMSPDERHVAAGSTDGTVFWELEKGVATTLEK I PASG I LAISWSFGTPLVSSDTKLLT I FW  
483AAFFPSGMLLASGQOAAVLV IYDYD IATVERVVT-AHSLALLBOWAFSRTRPAPRKRRS-IQVL  
443KCLSPDDBVVAAGSADGSVHWSLSKGN I V I LK-EQTS I I LCGSWSG I GKL I ASADKNGYV I WT  
440PCCLSPDENS I IAGANDGSV IWSRLKDGVT I LO-GHSSSVVS I SWGGLG-PLATADKH-H I Y IWT  
439KCLSPDNENVAVAGSADGAVVWSRKNNEGSVLKGGTYPVLACAVSGVKKPLATADKSGR I C IWE  
476KACVSPNGOVI IAGSADG I V I WNTKKGKFEKALTKGKSAV I AGAVSPLGDOFVS GSKDKS I V IWE  
477KAAFSPDARVAL I GGLGR I VWDNTNTRHEAV I SRDPSMS I SEVGNPNSSQVVASAHKDKV I FW  
270KACVSPDARVAL I IAGGANSTV I WDRSSAKV I KQLG-GR I R I NAWAVSGK V I SADKN I V IWE  
474KACVSPDARVALVAGSADGSVH I WDRSSAKV I KQLG-GR I R I NAWAVSGK V I SADKN I V IWE  
440KVRMLKNRNLV I GGSN I YG I S I DSKOTDNFN-CBDNY I VALAVK-DONKMI I DKNBVL I WT  
477MKMMLKDEMDVL I GGGNGS I FEFSSQTFKQKSELT-SHK I PL I LAAS-SGNSLASGDNQYV I WT  
435HQMMLNDSDA I I GSTDGS I YN I DLENFKFNKSG-GR I TPVFCVAVKQNLGTMA I DKSNGN I WT  
420KLSASPCGGFVVAAGSDGDTVL I FDMQENK I VYENK-HNKPVLCGS I AFAY-NML I TADTNHTLAWT  
476KLSASPCGGFVVAAGSDGDTVL I FDMQENK I VYENK-HNKPVLCGS I AFAY-NML I TADTNHTLAWT  
476KLSASPCGGFVVAAGSDGDTVL I FDMQENK I VYENK-HNKPVLCGS I AFAY-NML I TADTNHTLAWT  
432 I IOMAMVDDA I I GSTTGD I YE I DLSNFKLRGTSK-A I DHPVYCVAASTQYGLLATGDRDGVV I FW  
418TSSVPT I RKFVCCVSGKNGM I GDI I TON I MF I FTR I EGRN I I G I AWSNDR I T I V I-----A  
446KLS I SPDCS I V I G I I D I A I V I WDT I L I S I K I L A I S I G I A I D I S I H I V I A I D I R I A I W I  
451KACLSPDGRV I VAGSADG I VYVNE I O I YD I T I K I S I R I V I T I-----I S E I V I C I V I A I D I S I G I A I D I S I H I V I A I D I R I A I W I  
449 I I A I L S I P S I G R I C I A I V I T I S I R I S I L I V I D I L I D I E R I V I A I E A A I O E H V I S I V A I A I O R I E V I A I T I S I N I D I K I R I V I W I  
479KACVSPDGK VVAAGSSSTQCLCWMG-GR I V I A I R I K I E I G I V I T I S I G I A I D I S I H I V I A I D I R I A I W I  
481KACFSPCGE I VAGSADG I T I G I K I F I W I S I L T I P I T I K I L V I N I G I S S I I T I G I T I W I I D I S I G I A I D I S I H I V I A I D I R I A I W I  
477KAVFSPRGE I V I A I G S S N G I F W I D I L G G L Y Q I H I K A I K D I S I G V S W R D D G S I I A S C D R K I L V I F Q  
478KATFSPHSR I VVAAGSSSGLFWNTASGL I E C S W S-GH K K S I S C G A W I H I M K F V I L I S S L D G I V F W  
-----M  
140-----GK  
177-----GR-----GRN  
139-----KG-----NA  
54-----ELSEKSAAEK I V  
482KCFSPDGRVVAAGSLDST I F W I N I O K S I L E K T A K-EH N A L V C G V S I S P G G G V F S A D K D R T V I C I W R  
471MTLS I PGGG F V A A G A V D S V F G W D R T K E Q T I-VTGG I Q T V N E V S I N P Y D S O M Y I D K S I G L S I W R  
434NACYS I G D G K V A I C G S N G S I Y I F N T F T N K K E V L K-QSPT I I M K I W D P T G K S I Y S E F K N N I I N I W I  
480KCLSPDGRV I VAGSADG I V I V W R A D A T I V E V L L R-AH N A V M S I G S P L G G Y M I A D L D K N V A W I  
395KCFSPDGS I I S S G A D G T V F F W D I A S K K I M V O S N K-EH K S A V C G V W I H P G G S A S A S D K D K C V W O N  
258-----M  
476KCFSPDGS I I S S G A D G T V F F W D I A S K K I M V O S N K-EH K S A V C G V W I H P G G S A S A S D K D K C V W O N  
418KVLSPDGS KAAAPASAKGVFWVDLSNEN I I S M S S D P L F S I G S P L S Q I I A G S K S G R L H I W A  
479KVLSPDGS VVAAGSAGSLY I W S V L T G K V E K V L S K O S S I N A V A V S P S G S H V V S V D K E C K A V I Y  
479KAVFSPDRSVALAGSCDGLY I W D V D T G K L E S R L O G P I C A A V N A V A V C Y S G S H M V S V D Q G R V L V W  
479KVLSPDGS VVAAGSAGSLY I W S V L T G K V E K V L S K O S S I N A V A V S P S G S H V V S V D K E C K A V I Y  
459KVLSPDGS VVAAGSAGSLY I W S V L T G K V E K V L S K O S S I N A V A V S P S G S H V V S V D K E C K A V I Y  
479KVLSPDGS VVAAGSAGSLY I W S V L T G K V E K V L S K O S S I N A V A V S P S G S H V V S V D K E C K A V I Y  
465KVLSPDGS I TLAGSADG I T I F I W N T R I G L L E R S I N B O R A S V N A I T W S M S G D Y V S V D R K M A V V W  
465KVLSPDGS I TLAGSADG I T I F I W N T R I G L L E R S I N B O R A S V N A I T W S M S G D Y V S V D R K M A V V W  
461KVLSPDGS VVAAGSAGSLY I W S V L T G K V E K V L S K O S S I N A V A V S P S G S H V V S V D K E C K A V I Y  
476KVLSPDGS VVAAGSADG I V L W N I T G K L E K T I D K G S S A I N S V S L S G A F V A S V E K S A V L W M  
473KASFNSGLK I A C S A D G A I V I W N V N-GFLEATLK-GSTAVN A V S I S E N N N M L A S V E K N K R C T I Y S  
328-----PDE-----IFLR  
445KVLSPDGS VVAAGSAGSLY I W N R N S T K L E K O L C S N E N A I F S L S W N P T G Y G L L S S K O K F V I L W K  
444KVRVSPCGOFLASGSKDS I Y W D T N T A E L V S K W E P N S S G V S S V M S P V S G L I S T Y L N G D V M W H  
463-CV I D D I-----MKGR I D K O I D E-----QTHGOTSNNR  
475KCFSPNAAV VVCGSVS I A V V I W A K D G T I E K V L T D G T R D V T A C A W K N S E M L E V S K D K H F V I W  
448KCM-----BQLHKAS I A W F S F L H S G R N L A C S I T D V L H F A P Q O D R H I M K R S T A I L L W  
479KAVFSPDR I M C-----GSCVWL T M D S V-----GLQV I L A S L I F I S T N S E-SVVC  
468KAVFSPCQVVA I G L A S G I L L W H I A K G E V E K R I S P C H S N A V T S L W S H D--H L I S V A K D I R L W A  
485KACFSPDGRVVAAGSADG I V L W N I T T G K M E K T F K-EH P N N G N A V A W I A G H Q V I S C D K D K N V V I Y  
464-----VASYR-----  
-----  
232KSVSCDSKFLAAGSSKDG I F W N L S G G A L L R O L S S L H S P V N S V O S I L K N E I L A C Y D K D T L I W V  
475KTFSPDGRFVA I G H D G N I V F N A L N G L D S I I K T P H A G E I M S I K W N D G D T F V L B K K-EH I H W  
432KCCSPDGK V I IAGSSNEVFOND I TOSKLE I V L K P P K A G C V A S I N P V O S Q I V S G H A N K I V I W N  
429K I S V A B K S I M V S V D G A V V W N L T T S F A C C V Y G G Y G S G C O M P L S S Q L I S G Y-BRNV I W D  
484KASVSPDGRV I A S G I D S I C I W D A T N G I K V K L T K V I G S S V C C S S P L A N I F I S A D K D K N I O W E  
484KACFSPDGOVVAAGS I D G L V I W E T T T G K L S I L K K G K T T V A V A W I H N G H O I A S C D R N G A V L W E  
447KACFSDAGNFVAAGSTTGCVFWNNTHTAALAH I T E G H A G V S S C T V G A R G K P L V T G S D A S L W S  
226-----D-----OFLMLL  
478KACLSPD I A H V A S G G M D G R I F W N V H S R K V S V L O-SHKCPE-ALRW I GDS--LEKKT K S G S K I A V

352  
548  
548  
369  
544  
547  
548  
274  
532  
439  
509  
508  
460  
547  
514  
321  
395  
352  
299  
547  
537  
540  
547  
264  
541  
335  
225  
544  
545  
545  
524  
547  
407  
547  
508  
503  
505  
542  
533  
541  
540  
504  
471  
500  
483  
470  
497  
474  
514  
514  
515  
544  
546  
543  
544  
142  
181  
143  
163  
547  
536  
499  
545  
258  
460  
541  
484  
545  
545  
545  
525  
545  
531  
531  
527  
542  
537  
334  
511  
510  
489  
541  
507  
526  
532  
550  
550  
298  
540  
497  
494  
550  
550  
513  
232  
540

Rhizaria\_Amonniae|seq\_107|ATG3  
Rhizaria\_Globobulimina|seq\_110|ATG3  
Rhizaria\_Globobulimina|seq\_109|ATG3  
Rhizaria\_Eucyrtid|seq\_108|ATG3  
Rhizaria\_Bigelowiella|AOA677HA05|ATG3  
Rhizaria\_Paulinella|AOA676VJ01|ATG3  
Rhizaria\_Toxoplasm|EPPR60315\_1|ATG3  
Alveolata\_Plasmodium|EUR72290\_1|ATG3  
Alveolata\_Plasmodium|ETW36828\_1|ATG3  
Alveolata\_Plasmodium|ETW42986\_1|ATG3  
Alveolata\_Vitrella|seq\_3|ATG3  
Alveolata\_Chromera|AOA604FRI0|ATG3  
Alveolata\_Oxyrrhis|AOA6V4C0S8|ATG3  
Alveolata\_Oxyrrhis|AOA6V5V0L1|ATG3  
Alveolata\_Karmania|AOA6T5FGZ0|ATG3  
Alveolata\_Tetrahymena|seq\_OIATG3  
Alveolata\_Tetrahymena|seq\_1|ATG3  
Stramenopiles\_Phytophthora|seq\_118|ATG3  
Stramenopiles\_Phytophthora|KAF403916\_1|ATG3  
Stramenopiles\_Perosporas|seq\_15|ATG3  
Stramenopiles\_Perosporas|seq\_117|ATG3  
Stramenopiles\_Aureococcus|seq\_14|ATG3  
Stramenopiles\_Aurantococcus|seq\_113|ATG3  
Telonemia\_SRR371266|seq\_129|ATG3  
Telonemia\_SRR371266|seq\_119|ATG3  
Centrohelida\_Raineriophrys|seq\_25|ATG3  
Centrohelida\_Raineriophrys|seq\_26|ATG3  
Centrohelida\_Raphidiophrys|seq\_23|ATG3  
Centrohelida\_Chaoanocyttis|seq\_23|ATG3  
Centrohelida\_Chaoanocyttis|seq\_22|ATG3  
Centrohelida\_Acanthocystis|seq\_41|ATG3  
Haptophyta\_Calcidiscus|AOA6USNW81|ATG3  
Haptophyta\_Scythosphaera|seq\_74|ATG3  
Haptophyta\_Isocyrtis|AOA6UQ08B7|ATG3  
Haptophyta\_Emiliana|AOA6S9UP68|ATG3  
Haptophyta\_Prymnesium|seq\_73|ATG3  
Haptophyta\_Pavlova|AOA616TAPQ0|ATG3  
Cryptista\_Guillardia|AOA6UDC0J3|ATG3  
Cryptista\_Rhodonas|seq\_42|ATG3  
Cryptista\_Comononas|seq\_39|ATG3  
Cryptista\_Palptonomas|seq\_41|ATG3  
Glaucophyta\_Gloeocheete|AOA6702I63|ATG3  
Glaucophyta\_Gloeocheete|seq\_69|ATG3  
Chlorophyta\_Ostreococcus|XP\_022839285\_1|ATG3  
Chlorophyta\_Micromonas|seq\_36|ATG3  
Chlorophyta\_Lobosphaeroides|seq\_32|ATG3  
Chlorophyta\_Chlorella|seq\_31|ATG3  
Chlorophyta\_Arabidopsis|BAB0895\_1|ATG3  
Chlorophyta\_Oryzal|EEC67434\_1|ATG3  
Chlorophyta\_Oryza|XP\_025879457\_1|ATG3  
Chlorophyta\_Marchantiales|seq\_35|ATG3  
Ancoracysta\_Ancoracysta|seq\_8|ATG3  
Ancoracysta\_Ancoracysta|seq\_10|ATG3  
Ancoracysta\_Ancoracysta|seq\_12|ATG3  
Melaiomonadida\_Melaiomonas|seq\_91|ATG3  
Trichomonada\_Trichomonas|XP\_02992361\_1|ATG3  
Metamonada\_Trichomonas|S113238-4-17545-16739|ATG3  
Metamonada\_Monoceromonoides|seq\_95|ATG3  
Metamonada\_Monoceromonoides|seq\_93|ATG3  
Metamonada\_Monoceromonoides|seq\_94|ATG3  
Discoba\_Rhynchopus|seq\_53|ATG3  
Discoba\_Rhynchopus|seq\_52|ATG3  
Discoba\_Diplonemal|seq\_47|ATG3  
Discoba\_Diplonemal|seq\_46|ATG3  
Discoba\_Trypanosoma|XP\_01177640\_1|ATG3  
Discoba\_Euglenia|seq\_48|ATG3  
Discoba\_Naegleria|XP\_002674391\_1|ATG3  
Discoba\_Percolomonas|seq\_51|ATG3  
Discoba\_Percolomonas|AOA6U0UX23|ATG3  
Discoba\_Andaliacae|seq\_43|ATG3  
Breviata\_Pygusil|seq\_13|ATG3  
Fungi\_Saccharomyces|seq\_11|ATG3  
Fungi\_Komagataella|seq\_63|ATG3  
Fungi\_Schizosaccharomyces|seq\_67|ATG3  
Fungi\_Claroidoelomus|seq\_58|ATG3  
Fungi\_Gigasporae|seq\_60|ATG3  
Fungi\_Catenulales|seq\_56|ATG3  
Fungi\_Pirromyces|seq\_65|ATG3  
Fungi\_Gonapodytes|seq\_62|ATG3  
Fungi\_Gonapodytes|XP\_01736114|ATG3  
Fungi\_Batrachochytrium|seq\_55|ATG3  
Fungi\_Fonticulae|seq\_59|ATG3  
Metazoa\_Homo|Q9N762|ATG3  
Metazoa\_Xenopus|seq\_106|ATG3  
Metazoa\_Danio|seq\_102|ATG3  
Metazoa\_Drosophila|seq\_105|ATG3  
Metazoa\_Daphnia|seq\_103|ATG3  
Metazoa\_Caenorhabditis|seq\_97|ATG3  
Metazoa\_Dicelymae|seq\_104|ATG3  
Metazoa\_Corticium|seq\_100|ATG3  
Metazoa\_Corticium|seq\_101|ATG3  
Holozoa\_Helgocetes|seq\_81|ATG3  
Holozoa\_Staphanocetes|seq\_88|ATG3  
Holozoa\_Salpingoecetes|seq\_85|ATG3  
Holozoa\_Casparosetes|seq\_75|ATG3  
Holozoa\_Ichthyophonus|seq\_78|ATG3  
Holozoa\_Creolima|seq\_79|ATG3  
Holozoa\_Sphaerothecum|seq\_87|ATG3  
Holozoa\_Coralochytrium|seq\_77|ATG3  
Amoebozoa\_Entamoeba|DS5711-9-30822-31628|ATG3  
Amoebozoa\_Dictyostelium|seq\_41|ATG3  
Amoebozoa\_Vermamoeba|seq\_8D|ATG3  
Amoebozoa\_Acanthamoeba|AC43782\_1|ATG3  
CRuMs\_Mantamonas|seq\_16|ATG3  
CRuMs\_Riiofilas|seq\_18|ATG3

[illegible]



[illegible]





Uncolored

1

2

3

4

5

6

7

8

9

10

11

12

13

14

15

16

17

18

19

20

21

22

23

24

25

26

27

28

29

30

31

32

33

34

35

36

37

38

39

40

41

42

43

44

45

46

47

48

49

50

51

52

53

54

55

56

57

58

59

60

61

62

63

64

65

66

67

68

69

70

71

72

73

74

75

76

77

78

79

80

81

82

83

84

85

86

87

88

89

90

91

92

93

94

95

96

97

98

99

100

101

102

103

104

105

106

107

108

109

110

111

112

113

114

115

116

117

118

119

120

121

122

123

124

125

126

127

128

129

130

131

132

133

134

135

136

137

138

139

140

141

142

143

144

145

146

147

148

149

150

151

152

153

154

155

156

157

158

159

160

161

162

163

164

165

166

167

168

169

170

171

172

173

174

175

176

177

178

179

180

181

182

183

184

185

186

187

188

189

190

191

192

193

194

195

196

197

198

199

200

201

202

203

204

205

206

207

208

209

210

211

212

213

214

215

216

217

218

219

220

221

222

223

224

225

226

227

228

229

230

231

232

233

234

235

236

237

238

239

240

241

242

243

244

245

246

247

248

249

250

251

252

253

254

255

256

257

258

259

260

261

262

263

264

265

266

267

268

269

270

271

272

273

274

275

276

277

278

279

280

281

282

283

284

285

286

287

288

289

290

291

292

293

294

295

296

297

298

299

300

301

302

303

304

305

306

307

308

309

310

311

312

313

314

315

316

317

318

319

320

321

322

323

324

325

326

327

328

329

330

331

332

333

334

335

336

337

338

339

340

341

342

343

344

345

346

347

348

349

350

351

352

353

354

355

356

357

358

359

360

361

362

363

364

365

366

367

368

369

370

371

372

373

374

375

376

377

378

379

380

381

382

383

384

385

386

387

388

389

390

391

392

393

394

395

396

397

398

399

400

401

402

403

404

405

406

407

408

409

410

411

412

413

414

415

416

417

418

419

420

421

422

423

424

425

426

427

428

429

430

431

432

433

434

435

436

437

438

439

440

441

442

443

444

445

446

447

448

449

450

451

452

453

454

455

456

457

458

459

460

461

462

463

464

465

466

467

468

469

470

471

472

473

474

475

476

477

478

479

480

481

482

483

484

485

486

487

488

489

490

491

492

493

494

495

496

497

498

499

500

501

502

503

504

505

506

507

508

509

510

511

512

513

514

515

516

517

518

519

520

521

522

523

524

52

Rhizaria\_Amonimnialseq\_90ATG4  
Rhizaria\_Globobuliminialseq\_93ATG4  
Rhizaria\_Eucyrtidialseq\_52ATG4  
Rhizaria\_Bigelowiellalseq\_91ATG4  
Rhizaria\_BigelowiellaOA61T52T90ATG4  
Rhizaria\_BigelowiellaOA61U1E37TATG4  
Rhizaria\_Paulinellalseq\_95ATG4  
Rhizaria\_Paulinellalseq\_94ATG4  
Alveolata\_Toxoplasmalesseq\_16ATG4  
Alveolata\_PlasmodiumFUR64051\_1ATG4  
Alveolata\_PlasmodiumXP\_00134834.1ATG4  
Alveolata\_VitrellaCEM25538\_1ATG4  
Alveolata\_OxyrrhisCEM2060\_1ATG4  
Alveolata\_ChromeraOA09G4JMT1ATG4  
Alveolata\_OxyrrhisOA6V4Q0L0AT4  
Alveolata\_KarenialOA6ATL4C07ATG4  
Alveolata\_KarenialOA6T58X9ATG4  
Alveolata\_Tetrahymenalseq\_001026038.2ATG4  
Alveolata\_Tetrahymenalseq\_3ATG4  
Alveolata\_Tetrahymenalseq\_1ATG4  
Alveolata\_Tetrahymenalseq\_0ATG4  
Stramenopiles\_Phytophthora102005171\_1ATG4  
Stramenopiles\_PhytophthoraAF4153498\_1ATG4  
Stramenopiles\_Percnosporelseq\_94ATG4  
Stramenopiles\_AureococcusXP\_009038807.1ATG4  
Stramenopiles\_Auraculacanthalseq\_95ATG4  
Telonemia\_SRR731266seq\_99ATG4  
Centrohelida\_Raineriophryalseq\_20ATG4  
Centrohelida\_Raineriophryalseq\_21ATG4  
Centrohelida\_Raphidophryalseq\_22ATG4  
Centrohelida\_Chaococystisseq\_18ATG4  
Centrohelida\_Chaococystisseq\_19ATG4  
Centrohelida\_Chaococystisseq\_17ATG4  
Centrohelida\_Chaococystisseq\_19ATG4  
Centrohelida\_Acanthocystisseq\_1ATG4  
Centrohelida\_Acanthocystisseq\_15ATG4  
Haptophyta\_Calcidiscusseq\_51ATG4  
Haptophyta\_Calcidiscusseq\_50ATG4  
Haptophyta\_Scyphosphaeralseq\_55ATG4  
Haptophyta\_Scyphosphaeralseq\_54ATG4  
Haptophyta\_PavlovaXP\_0057112ATG4  
Haptophyta\_IsochrysalOA06T7QWJ3ATG4  
Haptophyta\_IsochrysalOA06T7QWJ3ATG4  
Haptophyta\_IsochrysalOA06T1G2W11ATG4  
Haptophyta\_EmlinalXP\_005781094.1ATG4  
Haptophyta\_Phyllisiamusseq\_53ATG4  
Haptophyta\_Pavlova1seq\_52ATG4  
Haptophyta\_PavlovaOA06T5Y923ATG4  
Cryptista\_Guillardialseq\_28ATG4  
Cryptista\_Guillardialseq\_27ATG4  
Cryptista\_RhodomonasOA06T719ATG4  
Cryptista\_RhodomonasOA06J4XJ2ATG4  
Cryptista\_GoniomonasOA06T2FN80ATG4  
Cryptista\_GoniomonasOA06T1ZEB6ATG4  
Cryptista\_Paltoniomonasseq\_29ATG4  
Cryptista\_GloeocystisXP\_0046185-534018-33167ATG4  
Chlorophyta\_OstreococcusOUS48866\_1ATG4  
Chlorophyta\_OstreococcusXP\_022838668.1ATG4  
Chlorophyta\_Micromonasseq\_26ATG4  
Chlorophyta\_Lobosphaeralseq\_25ATG4  
Chlorophyta\_ChlamydomonadXP\_001691049.1ATG4  
Chlorophyta\_ChlamydomonadXP\_001691049.1ATG4  
Chlorophyta\_Arabidopsialseq\_23ATG4  
Chlorophyta\_Arabidopsialseq\_24ATG4  
Chlorophyta\_OryzalAR88722\_1ATG4  
Chlorophyta\_OryzalECC75888\_1ATG4  
Chlorophyta\_OryzalCAJ86292\_1ATG4  
Chlorophyta\_MarchantiaOAE22546\_1ATG4  
Ancoracysta\_Ancoracystalseq\_8ATG4  
Hemiasysophora\_Synalga1seq\_58ATG4  
Ancyromnadiida\_Natomonasseq\_9ATG4  
Malawimonadida\_Malawimonasseq\_70ATG4  
Malawimonadida\_Malawimonasseq\_69ATG4  
Metamonada\_TritrichomonasOHT08429\_1ATG4  
Metamonada\_TritrichomonasOHT08429\_1ATG4  
Metamonada\_TritrichomonasOHT06355\_1ATG4  
Metamonada\_Tritrichomonasseq\_75ATG4  
Metamonada\_Tritrichomonasseq\_74ATG4  
Metamonada\_TrichomonasDS113262-2-111053-111978ATG4  
Metamonada\_TrichomonasOHT09381ATG4  
Metamonada\_TrichomonasDS113332-3-111930-112781ATG4  
Metamonada\_TrichomonasDS114140-5-2886-1912ATG4  
Metamonada\_TrichomonasDS114357-4-5429-4539ATG4  
Metamonada\_Noncercomonoidesseq\_71ATG4  
Metamonada\_Noncercomonoidesseq\_73ATG4  
Metamonada\_Noncercomonoidesseq\_72ATG4  
Discoba\_Rhynchopisseq\_38ATG4  
Discoba\_Rhynchopisseq\_37ATG4  
Discoba\_Rhynchopisseq\_36ATG4  
Discoba\_Diplonemalseq\_33ATG4  
Discoba\_Diplonemalseq\_32ATG4  
Discoba\_Diplonemalseq\_31ATG4  
Discoba\_TrypanosomalT9227\_11-5-471102-570116ATG4  
Discoba\_TrypanosomalT9227\_11-5-471102-570116ATG4  
Discoba\_Euglenalseq\_35ATG4  
Discoba\_Naegeliaseq\_36ATG4  
Discoba\_PercolomonasOA04UHB63ATG4  
Discoba\_PercolomonasOA04UHB63ATG4  
Discoba\_Andacualiseq\_30ATG4  
Breviata\_Pyruvalseq\_11ATG4  
Breviata\_Pyruvalseq\_10ATG4  
Fungi\_Saccharomycesseq\_48ATG4  
Fungi\_Komagataalseq\_47ATG4  
Fungi\_Schizosaccharomycesseq\_49ATG4  
Fungi\_Claridoeaolomusseq\_43ATG4  
Fungi\_Claridoeaolomusseq\_44ATG4  
Fungi\_GasparalR102035\_1ATG4  
Fungi\_Gasparalseq\_45ATG4  
Fungi\_Catenarialseq\_41ATG4  
Fungi\_Catenarialseq\_41ATG4  
Fungi\_PromycesORX60991\_1ATG4  
Fungi\_GonapodyxKVS18344\_1ATG4  
Fungi\_Batrachochytriumseq\_40ATG4  
Fungi\_Fonticulaeq\_45ATG4  
Fungi\_FonticulaXP\_009494799.1ATG4  
Metazoa\_HomoINP\_116241.2ATC4C  
Metazoa\_HomoXP\_008722990.1ATG4  
Metazoa\_HomoINP\_443168.2ATG4A  
Metazoa\_HomoINP\_037457.3ATG4B  
Metazoa\_Xenopusseq\_89ATG4  
Metazoa\_Xenopusseq\_87ATG4  
Metazoa\_XenopusXP\_01282605.1ATG4  
Metazoa\_Danioseq\_82ATG4  
Metazoa\_DanioXP\_01232507.1ATG4  
Metazoa\_DanioXP\_01720992.1ATG4  
Metazoa\_Danioseq\_83ATG4  
Metazoa\_DanioOA04R4IXG1ATG4  
Metazoa\_DanioXP\_00516990.1ATG4  
Metazoa\_Drosophilalseq\_83ATG4  
Metazoa\_Drosophilalseq\_85AT411ATG4  
Metazoa\_DaphniaEPFX2987.1ATG4  
Metazoa\_Caenorhabditisseq\_77ATG4  
Metazoa\_Caenorhabditisseq\_76ATG4  
Metazoa\_Dicelymaleq\_84ATG4  
Metazoa\_Corticuliseq\_79ATG4  
Metazoa\_Corticuliseq\_81ATG4  
Metazoa\_Corticuliseq\_80ATG4  
Metazoa\_Corticuliseq\_78ATG4  
Crustacea\_Helgocarpalseq\_63ATG4  
Holozoa\_Helgocarpalseq\_63ATG4  
Holozoa\_Stephanocarpalseq\_68ATG4  
Holozoa\_Stephanocarpalseq\_67ATG4  
Holozoa\_Salpincarpalseq\_65ATG4  
Holozoa\_Capsasporelseq\_58ATG4  
Holozoa\_Capsasporelseq\_57ATG4  
Holozoa\_Ichthyophonulseq\_64ATG4  
Holozoa\_Cremonalseq\_61ATG4  
Holozoa\_Cremonalseq\_60ATG4  
Holozoa\_Sphaerotherculiseq\_66ATG4  
Holozoa\_Caractochytriumseq\_59ATG4  
Amoebozoa\_EntamoebaDS571181-3-61809-62867ATG4  
Amoebozoa\_EntamoebaXP\_653798.2ATG4  
Amoebozoa\_EntamoebaXP\_653798.2ATG4  
Amoebozoa\_EntamoebaDS571322-3-5886-6992ATG4  
Amoebozoa\_EntamoebaDS571161-4-22406-21408ATG4  
Amoebozoa\_Dicystelluliseq\_51ATG4  
Amoebozoa\_Dicystelluliseq\_49ATG4  
Amoebozoa\_Vermamoebalseq\_41ATG4  
Amoebozoa\_Vermamoebalseq\_40ATG4  
Amoebozoa\_AcanthamoebaXP\_004334148.1ATG4  
Amoebozoa\_AcanthamoebaXP\_004334121.1ATG4  
Crulle\_Martamonas1seq\_73ATG4  
Crulle\_Raffinialseq\_13ATG4

1  
2  
3  
4  
5  
6  
7  
8  
9  
10  
11  
12  
13  
14  
15  
16  
17  
18  
19  
20  
21  
22  
23  
24  
25  
26  
27  
28  
29  
30  
31  
32  
33  
34  
35  
36  
37  
38  
39  
40  
41  
42  
43  
44  
45  
46  
47  
48  
49  
50  
51  
52  
53  
54  
55  
56  
57  
58  
59  
60  
61  
62  
63  
64  
65  
66  
67  
68  
69  
70  
71  
72  
73  
74  
75  
76  
77  
78  
79  
80  
81  
82  
83  
84  
85  
86  
87  
88  
89  
90  
91  
92  
93  
94  
95  
96  
97  
98  
99  
100  
101  
102  
103  
104  
105  
106  
107  
108  
109  
110  
111  
112  
113  
114  
115  
116  
117  
118  
119  
120  
121  
122  
123  
124  
125  
126  
127  
128  
129  
130  
131  
132  
133  
134  
135  
136  
137  
138  
139  
140  
141  
142  
143  
144  
145  
146  
147  
148  
149  
150  
151  
152  
153  
154  
155  
156  
157  
158  
159  
160  
161  
162  
163  
164  
165  
166  
167  
168  
169  
170  
171  
172  
173  
174  
175  
176  
177  
178  
179  
180  
181  
182  
183  
184  
185  
186  
187  
188  
189  
190  
191  
192  
193  
194  
195  
196  
197  
198  
199  
200  
201  
202  
203  
204  
205  
206  
207  
208  
209  
210  
211  
212  
213  
214  
215  
216  
217  
218  
219  
220  
221  
222  
223  
224  
225  
226  
227  
228  
229  
230  
231  
232  
233  
234  
235  
236  
237  
238  
239  
240  
241  
242  
243  
244  
245  
246  
247  
248  
249  
250  
251  
252  
253  
254  
255  
256  
257  
258  
259  
260  
261  
262  
263  
264  
265  
266  
267  
268  
269  
270  
271  
272  
273  
274  
275  
276  
277  
278  
279  
280  
281  
282  
283  
284  
285  
286  
287  
288  
289  
290  
291  
292  
293  
294  
295  
296  
297  
298  
299  
300  
301  
302  
303  
304  
305  
306  
307  
308  
309  
310  
311  
312  
313  
314  
315  
316  
317  
318  
319  
320  
321  
322  
323  
324  
325  
326  
327  
328  
329  
330  
331  
332  
333  
334  
335  
336  
337  
338  
339  
340  
341  
342  
343  
344  
345  
346  
347  
348  
349  
350  
351  
352  
353  
354  
355  
356  
357  
358  
359  
360  
361  
362  
363  
364  
365  
366  
367  
368  
369  
370  
371  
372  
373  
374  
375  
376  
377  
378  
379  
380  
381  
382  
383  
384  
385  
386  
387  
388  
389  
390  
391  
392  
393  
394  
395  
396  
397  
398  
399  
400  
401  
402  
403  
404  
405  
406  
407  
408  
409  
410  
411  
412  
413  
414  
415  
416  
417  
418  
419  
420  
421  
422  
423  
424  
425  
426  
427  
428  
429  
430  
431  
432  
433  
434  
435  
436  
437  
438  
439  
440  
441  
442  
443  
444  
445  
446  
447  
448  
449  
450  
451  
452  
453  
454  
455  
456  
457  
458  
459  
460  
461  
462  
463  
464  
465  
466  
467  
468  
469  
470  
471  
472  
473  
474  
475  
476  
477  
478  
479  
480  
481  
482  
483  
484  
485  
486  
487  
488  
489  
490  
491  
492  
493  
494  
495  
496  
497  
498  
499  
500  
501  
502  
503  
504  
505  
506  
507  
508  
509  
510  
511  
512  
513  
514  
515  
516  
517  
518  
519  
520  
521  
522  
523  
524  
525  
526  
527  
528  
529  
530  
531  
532  
533  
534  
535  
536  
537  
538  
539  
540  
541  
542  
543  
544  
545  
546  
547  
548  
549  
550  
551  
552  
553  
554  
555  
556  
557  
558  
559  
560  
561  
562  
563  
564  
565  
566  
567  
568  
569  
570  
571  
572  
573  
574  
575  
576  
577  
578  
579  
580  
581  
582  
583  
584  
585  
586  
587  
588  
589  
590  
591  
592  
593  
594  
595  
596  
597  
598  
599  
600  
601  
602  
603  
604  
605  
606  
607  
608  
609  
610  
611  
612  
613  
614  
615  
616  
617  
618  
619  
620  
621  
622  
623  
624  
625  
626  
627  
628  
629  
630  
631  
632  
633  
634  
635  
636  
637  
638  
639  
640  
641  
642  
643  
644  
645  
646  
647  
648  
649  
650  
651  
652  
653  
654  
655  
656  
657  
658  
659  
660  
661  
662  
663  
664  
665  
666  
667  
668  
669  
670  
671  
672  
673  
674  
675  
676  
677  
678  
679  
680  
681  
682  
683  
684  
685  
686  
687  
688  
689  
690  
691  
692  
693  
694  
695  
696  
697  
698  
699  
700  
701  
702  
703  
704  
705  
706  
707  
708  
709  
710  
711  
712  
713  
714  
715  
716  
717  
718  
719  
720  
721  
722  
723  
724  
725  
726  
727  
728  
729  
730  
731  
732  
733  
734  
735  
736  
737  
738  
739  
740  
741  
742  
743  
744  
745  
746  
747  
748  
749  
750  
751  
752  
753  
754  
755  
756  
757  
758  
759  
760  
761  
762  
763  
764  
765  
766  
767  
768  
769  
770  
771  
772  
773  
774  
775  
776  
777  
778  
779  
780  
781  
782  
783  
784  
785  
786  
787  
788  
789  
790  
791  
792  
793  
794  
795  
796  
797  
798  
799  
800  
801  
802  
803  
804  
805  
806  
807  
808  
809  
810  
811  
812  
813  
814  
815  
816  
817  
818  
819  
820  
821  
822  
823  
824  
825  
826  
827  
828  
829  
830  
831  
832  
833  
834  
835  
836  
837  
838  
839  
840  
84



[illegible]







**Data S1.** Multiple sequence alignment of ATG7 (**A**), ATG10 (**B**), ATG12 (**C**), ATG5 (**D**), ATG16 (**E**), ATG3 (**F**), ATG8 (**G**), and ATG4 (**H**) homologs identified in this study. Columns with more than 50% gaps are removed. For ATG8 and ATG12, columns with many gaps are removed manually. Sequences with “?” in Figure 2 are included.
